# Supplementary material for: On the tear proteome of the house mouse (Mus musculus musculus) in relation to chemical signalling
Source: PeerJ. 2017 Jul 7;5:e3541. doi: 10.7717/peerj.3541 (PMC5502090; doi:10.7717/peerj.3541)
Supplement: Data S1 — Original data from LC-MS/MS (i.e. log2 transformed peak areas, and lipocalin peptides) and from the RNAseq-based analysis (i.e. Count table, DESeq p-values) also including the list of unique peptides for MUP and OBP analyses with LC-MS/MS. [file peerj-05-3541-s001.xls]

## Sheet: mRNASEQ CountTable
GENE SYMBOLS	Female1	Female2	Female3	Female4	Male1	Male2	Male3	Male4	baseMean	baseMeanMALES	baseMeanFEMALES	foldChange	log2FoldChange	pval	padj
Scgb2b7	0	3	0	1	1046	190	494	1379	372.922	745.156	0.687746	0.000922956	-10.0814	3.12235e-18	6.93163e-16
Scgb1b20	0	0	0	0	102	17	42	117	33.0231	66.0462	0	0	#NAME?	2.74539e-14	3.04739e-12
Spt1	1546	1840	1316	1968	151	59	130	116	734.227	123.253	1345.2	10.9142	3.44813	5.00498e-08	3.70369e-06
Obp7	172	359	259	219	9	7	41	13	114.016	20.4449	207.587	10.1535	3.34391	1.58097e-07	8.77441e-06
Scgb1b3	11	19	14	19	202	199	152	456	152.285	291.991	12.5784	0.0430781	-4.5369	8.36452e-07	3.71385e-05
Scgb1b7	0	2	0	0	122	18	130	328	72.1506	143.937	0.36469	0.00253368	-8.62455	1.64789e-06	6.09718e-05
Esp18	0	19	0	0	44	22	21	62	21.7024	39.9403	3.46455	0.0867433	-3.5271	3.7286e-06	0.00011825
9530002B09Rik	0	0	0	0	0	19	82	83	26.6938	53.3876	0	0	#NAME?	7.33029e-06	0.000203416
Scgb2b3	5	18	0	0	150	190	118	219	109.363	214.2	4.5261	0.0211302	-5.56455	1.02261e-05	0.000252244
Esp16	9	68	7	32	122	64	66	217	72.9457	124.898	20.9931	0.168082	-2.57277	0.00018907	0.00419736
Obp5	757	772	863	1189	64	83	251	181	448.143	171.573	724.713	4.22393	2.07859	0.000226394	0.00456905
Scgb2b1	4	11	5	17	0	0	0	1	3.47128	0.226782	6.71578	29.6134	4.88818	0.000857427	0.0158624
Mup4	0	0	0	2	25	32	13	23	15.566	30.8506	0.281424	0.00912214	-6.77641	0.000944444	0.0161282
Esp24	0	0	0	0	3	3	0	7	1.87278	3.74556	0	0	#NAME?	0.0076203	0.120836
Cyp4a12b	0	0	0	1	5	5	2	4	2.61772	5.09474	0.140712	0.0276191	-5.17819	0.00878208	0.129975
Obp8	12	10	16	28	0	2	6	3	8.26149	3.54139	12.9816	3.66568	1.87408	0.00986718	0.136907
RP23-421B1.4	1	2	0	0	7	2	4	6	2.73479	4.85611	0.613468	0.126329	-2.98474	0.0142626	0.186253
Scgb1b28-ps	0	0	0	0	3	0	5	2	1.2278	2.4556	0	0	#NAME?	0.0242459	0.287869
Nop10	0	0	0	1	3	1	1	7	1.54649	2.95228	0.140712	0.0476621	-4.39101	0.0246375	0.287869
Esp1	3	1	1	5	12	5	11	3	5.32423	8.75166	1.89679	0.216735	-2.20599	0.0280504	0.311359
Scgb2b20	0	0	0	0	3	0	2	10	1.69184	3.38367	0	0	#NAME?	0.0316653	0.334747
Hba	3	1	2	11	0	0	1	0	1.65051	0.295394	3.00562	10.175	3.34695	0.0408419	0.410008
Pigr	4	0	4	4	4	11	9	14	7.56876	12.5213	2.61618	0.208938	-2.25885	0.0424783	0.410008
Rpl17	2	0	3	1	12	2	1	5	3.0251	4.61827	1.43193	0.310059	-1.68939	0.0525781	0.476566
Atp5j	1	0	0	2	6	2	4	2	2.15208	3.77396	0.530202	0.14049	-2.83147	0.0536673	0.476566
Gm5097	5	0	0	0	8	4	23	2	6.03453	10.8252	1.24389	0.114907	-3.12146	0.0633448	0.540867
Bpifa2	34	1	1	1136	0	0	0	2	84.6038	0.453563	168.754	372.063	8.5394	0.0720567	0.592466
Smr3a	16	0	1	175	0	1	0	0	14.707	0.544341	28.8696	53.0358	5.7289	0.0763838	0.59803
Dcpp1	4	2	0	425	0	0	0	0	30.5812	0	61.1623	Inf	Inf	0.078121	0.59803
Eif1	0	0	1	1	4	2	4	0	1.68781	2.97035	0.405267	0.136437	-2.87369	0.0927767	0.686547
Wfdc12	39	33	20	49	23	8	12	6	20.5957	13.2857	27.9057	2.10044	1.07069	0.0980434	0.702118
Esp15	86	254	56	200	312	145	227	175	175.473	240.278	110.668	0.460583	-1.11847	0.111504	0.773562
Dpp10	0	0	1	0	7	3	0	0	1.56137	2.85819	0.264555	0.0925604	-3.43346	0.120909	0.813386
Lcn11	695	1008	604	784	382	92	298	504	473.039	319.264	626.814	1.96331	0.973289	0.135962	0.884897
Plet1	1	1	0	8	0	0	0	0	0.778409	0	1.55682	Inf	Inf	0.139511	0.884897
Lpo	44	17	27	33	11	14	11	12	20.6747	15.5167	25.8326	1.66482	0.735366	0.15908	0.964128
Agr2	6	4	6	9	18	7	5	11	8.00408	10.9324	5.07579	0.464289	-1.1069	0.160688	0.964128
Hint1	1	2	0	0	5	0	3	2	1.41416	2.21486	0.613468	0.276978	-1.85216	0.167421	0.978093
mt-Nd5	8	2	6	14	1	4	2	2	4.65448	3.39674	5.91221	1.74056	0.799548	0.172855	0.983946
Calr	3	0	1	2	4	1	6	3	2.49473	3.69714	1.29231	0.349544	-1.51645	0.182737	0.99152
Rpl31	0	2	2	2	6	2	1	5	2.37167	3.56812	1.17522	0.329367	-1.60223	0.183688	0.99152
Ifitm3	1	0	0	1	4	0	3	1	1.10127	1.81306	0.38949	0.214825	-2.21876	0.187585	0.99152
Ssr4	0	0	2	0	5	0	3	0	1.1452	1.7613	0.52911	0.300409	-1.735	0.202963	1
Hsp90ab1	0	0	0	3	4	1	2	2	1.35546	2.28879	0.422135	0.184436	-2.4388	0.217037	1
Gm13340	4	2	2	9	2	1	0	1	2.13824	1.12117	3.15532	2.81431	1.49278	0.21887	1
Iglc1	0	1	5	3	5	1	4	7	3.05788	4.1885	1.92726	0.46013	-1.11989	0.225649	1
Zfp664	5	0	5	0	0	0	1	0	1.43103	0.295394	2.56667	8.68897	3.11919	0.2308	1
RP23-340H19.3	0	0	0	2	4	3	1	0	1.45497	2.62851	0.281424	0.107066	-3.22343	0.236933	1
Rpl23a	2	4	5	8	4	0	0	1	2.30114	0.926876	3.67541	3.96537	1.98746	0.243272	1
Rpl15	2	5	3	8	2	0	3	0	2.28243	1.23623	3.32864	2.69258	1.42899	0.27283	1
Eif3a	1	0	0	2	1	2	4	1	1.60113	2.67206	0.530202	0.198424	-2.33334	0.273379	1
Taldo1	0	1	0	2	0	1	3	4	1.40071	2.33765	0.463768	0.198391	-2.33358	0.278627	1
Rplp2	0	1	2	0	4	1	1	2	1.35242	1.99339	0.711455	0.356907	-1.48638	0.2801	1
P4hb	6	1	4	6	6	3	11	5	5.32195	7.0664	3.57751	0.50627	-0.982022	0.298692	1
Eif3c	1	5	3	5	1	2	1	0	2.10841	1.5591	2.65773	1.70465	0.76948	0.322368	1
Rps23	6	8	8	11	22	3	13	4	8.42324	10.2308	6.6157	0.646646	-0.628951	0.327954	1
Obp1	11	27	18	23	19	4	7	6	12.2947	8.93126	15.6582	1.75319	0.809986	0.328258	1
Sval2	154	329	153	267	193	36	59	167	142.513	108.677	176.35	1.62271	0.698403	0.337366	1
Nedd4	3	0	1	1	1	0	5	4	1.85536	2.55912	1.1516	0.45	-1.152	0.338624	1
Ndufa3	1	0	0	8	0	1	0	0	0.959407	0.544341	1.37447	2.52502	1.3363	0.340968	1
Rps13	0	5	3	4	1	0	1	1	1.48272	0.697199	2.26824	3.25336	1.70193	0.341166	1
Lcmt1	6	5	5	7	8	1	18	7	6.78062	8.84908	4.71215	0.532502	-0.909142	0.342447	1
Gm12886	0	31	17	68	26	5	3	14	15.526	11.3334	19.7185	1.73985	0.798966	0.343907	1
Scgb2a2	5397	12040	5326	8740	13860	3160	5906	11260	7310.51	8444.1	6176.93	0.731508	-0.451054	0.344336	1
Rpl37	1	5	8	4	2	0	2	2	2.61709	1.3944	3.83979	2.75373	1.46139	0.345928	1
Fkbp11	0	0	2	2	1	1	7	1	1.91222	3.0139	0.810534	0.268932	-1.89469	0.348273	1
Scgb1b24	37	38	27	44	53	17	39	56	36.1092	42.7502	29.4682	0.689312	-0.536771	0.349462	1
Atp5l	3	5	8	8	4	1	1	3	3.56018	2.22017	4.90019	2.20712	1.14217	0.353562	1
Rps6	2	1	1	3	7	1	3	1	2.12453	2.88247	1.36659	0.474105	-1.07672	0.35404	1
Nme1	3	0	0	2	4	0	5	1	1.7158	2.40384	1.02776	0.427548	-1.22584	0.35649	1
Tmed3	1	0	0	2	1	2	2	2	1.41913	2.30806	0.530202	0.229718	-2.12206	0.362053	1
Ubb	1	5	0	2	8	2	2	1	2.37418	3.30644	1.44193	0.436096	-1.19728	0.364538	1
Pglyrp1	0	2	3	4	15	0	2	1	2.58206	3.44292	1.7212	0.499925	-1.00022	0.366275	1
Atox1	0	1	1	1	3	0	5	0	1.29482	2.00204	0.587612	0.293507	-1.76854	0.378541	1
Hbb-bs	0	3	4	2	1	0	0	1	1.14424	0.401805	1.88668	4.6955	2.23128	0.382384	1
Lcrn	1390	4632	1021	2125	2816	642	1770	4565	2079.99	2400.44	1759.55	0.733011	-0.448094	0.385133	1
Rps26	4	3	4	2	1	0	1	2	1.90289	0.92398	2.88179	3.11889	1.64103	0.386233	1
Ndufa6	6	8	1	2	1	1	1	3	2.59626	1.6951	3.49741	2.06324	1.04491	0.387039	1
Serp1	0	0	1	3	4	2	0	2	1.46451	2.24234	0.68669	0.306238	-1.70727	0.388887	1
Ndufa11	3	6	3	7	2	1	3	1	2.8132	2.00735	3.61905	1.8029	0.850319	0.394499	1
1700028K03Rik	1	0	0	3	1	0	9	2	1.97902	3.28713	0.670914	0.204103	-2.29263	0.407455	1
Cnpy2	0	1	0	3	1	1	0	6	1.34227	2.08005	0.60448	0.290608	-1.78285	0.417182	1
Cox7b	2	1	3	1	4	0	5	2	2.12245	2.63063	1.61428	0.613648	-0.704516	0.427224	1
Sec62	2	4	2	0	4	3	4	1	2.74876	3.74147	1.75605	0.469346	-1.09128	0.43884	1
Rps3a1	3	1	2	3	7	2	2	2	2.61906	3.3582	1.87993	0.559802	-0.837011	0.441738	1
Rpl32	12	21	15	27	39	4	15	22	16.5028	18.4234	14.5821	0.791501	-0.337337	0.44333	1
Ndufa5	2	7	1	0	2	1	0	0	1.46646	0.894388	2.03853	2.27924	1.18855	0.452338	1
Scgb1b27	19	29	24	49	41	14	15	56	27.5932	31.9274	23.259	0.728496	-0.457007	0.458212	1
Sval2	174	250	110	217	159	38	72	147	125.814	103.119	148.509	1.44017	0.526243	0.461649	1
Uba52	4	1	0	3	2	0	0	0	0.97482	0.350047	1.59959	4.56965	2.19209	0.477228	1
Scgb2b24	1278	1695	999	1747	2259	488	771	2118	1253.11	1369.09	1137.13	0.830572	-0.267822	0.482523	1
Rpl35	11	11	5	21	23	4	9	15	10.6416	12.2632	9.02008	0.735542	-0.44312	0.491114	1
Apobec3	0	4	1	9	2	0	1	2	1.67967	1.099	2.26034	2.05672	1.04034	0.49491	1
Gng5	0	1	2	2	5	0	1	2	1.30848	1.62407	0.992878	0.61135	-0.709929	0.502338	1
Krt18	2	0	0	3	2	0	4	2	1.45244	1.98518	0.919692	0.463278	-1.11005	0.502729	1
Rps12-ps3	1	0	1	3	3	1	2	2	1.52462	2.11376	0.935469	0.442561	-1.17605	0.502947	1
Rps29	0	3	1	1	1	2	1	4	1.70926	2.46623	0.952301	0.386137	-1.37282	0.503571	1
mt-Nd2	6	2	1	2	0	1	2	1	1.88262	1.36191	2.40334	1.76468	0.819409	0.50549	1
Eef2	1	0	2	3	3	0	2	4	1.6115	2.02298	1.20002	0.593195	-0.753422	0.507704	1
Bglap3	25	142	41	162	190	19	0	201	77.4673	89.18	65.7545	0.737323	-0.439632	0.508393	1
mt-Nd1	4	3	1	16	2	0	1	7	3.1455	2.23291	4.05809	1.8174	0.861875	0.512872	1
mt-Cytb	3	3	2	4	6	0	4	5	2.87548	3.36562	2.38533	0.708733	-0.496687	0.515123	1
Ndufc1	0	3	4	1	4	0	4	3	2.15399	2.56201	1.74597	0.681482	-0.553252	0.515307	1
Esp6	311	505	381	473	678	138	314	489	367.121	397.435	336.806	0.847451	-0.238799	0.516299	1
Uqcrh	1	0	2	0	7	0	0	0	1.00153	1.22516	0.777888	0.634926	-0.65534	0.518209	1
Nupr1	10	16	9	25	10	4	14	4	10.1372	8.97024	11.3041	1.26018	0.333627	0.52575	1
Rpl4	2	1	3	12	3	4	8	6	4.79419	6.42627	3.16211	0.492059	-1.0231	0.526925	1
Gm12873	12	13	13	26	31	6	5	23	13.9191	15.3847	12.4535	0.809475	-0.304942	0.527954	1
Rps17	1	6	2	2	0	0	3	1	1.63317	1.11296	2.15338	1.93482	0.952199	0.53108	1
Uqcrb	1	9	7	10	10	0	1	2	3.82404	2.49919	5.14888	2.06022	1.0428	0.563227	1
Rps24	2	5	4	10	3	2	3	2	3.41406	2.9535	3.87462	1.31188	0.39163	0.567715	1
Rps19	5	13	14	14	20	6	15	6	10.9231	12.5581	9.28811	0.73961	-0.435163	0.56825	1
mt	1	3	1	9	2	2	2	0	2.17815	2.02952	2.32677	1.14647	0.197195	0.574761	1
Rfc1	0	8	1	0	2	0	0	0	1.03668	0.350047	1.72331	4.92309	2.29956	0.58082	1
Igha	10	13	11	20	9	3	24	18	12.4812	14.3797	10.5826	0.735938	-0.442343	0.581365	1
Rps7	6	4	6	1	3	0	4	1	2.94176	1.93343	3.95009	2.04305	1.03073	0.588388	1
Rpl26	1	2	2	6	5	0	3	5	2.44103	2.89521	1.98685	0.686255	-0.543184	0.589728	1
Rplp1	3	6	1	3	7	2	2	4	3.16943	3.81176	2.52709	0.662973	-0.592978	0.591129	1
Mucl1	39	8	2	7	1	1	17	3	9.54831	6.4214	12.6752	1.9739	0.98105	0.594848	1
Rps14	11	19	10	33	16	1	12	12	11.5505	9.61082	13.4902	1.40364	0.489175	0.599392	1
Pabpc1	1	0	2	3	6	0	2	0	1.42048	1.64093	1.20002	0.731308	-0.451449	0.61294	1
Hsp90b1	0	0	1	4	3	1	2	1	1.35719	1.88698	0.827402	0.438479	-1.18942	0.620076	1
Gm6086	0	1	1	3	3	1	3	0	1.41231	1.95559	0.869035	0.444385	-1.17012	0.621081	1
Xbp1	4	1	1	0	2	2	1	3	1.92824	2.41447	1.44201	0.597239	-0.74362	0.623988	1
Sub1	0	0	0	4	5	1	0	0	0.991153	1.41946	0.562847	0.396522	-1.33453	0.624382	1
Trp53inp2	0	1	1	2	0	1	4	1	1.34051	1.9527	0.728323	0.372983	-1.42282	0.624682	1
Gm10116	2	1	0	1	0	2	3	1	1.51113	2.20164	0.820613	0.372728	-1.42381	0.62641	1
Hp	8	3	10	19	4	8	16	12	10.1794	12.5025	7.85634	0.628381	-0.670288	0.629529	1
Gm13339	3	1	3	8	1	0	1	5	2.22618	1.60433	2.84804	1.77523	0.828003	0.640082	1
Scgb2b26	3	8	4	12	12	3	3	9	5.80619	6.66052	4.95185	0.743464	-0.427666	0.642516	1
Rps20	3	9	5	8	7	0	3	3	3.8138	2.79169	4.83591	1.73225	0.792648	0.643137	1
Ndufa2	0	0	0	5	5	2	0	0	1.33368	1.9638	0.703559	0.358264	-1.4809	0.661116	1
Rpl8	4	1	4	13	2	4	3	3	4.07943	4.09394	4.06493	0.992915	-0.0102577	0.674834	1
Wdr31	6	0	2	6	0	1	4	2	2.52276	2.17948	2.86605	1.31502	0.395081	0.679737	1
Ndufv3	2	2	1	6	2	1	1	1	1.69382	1.41656	1.97107	1.39145	0.476586	0.683452	1
Gm12888	0	6	2	5	4	0	0	2	1.7402	1.15366	2.32674	2.01684	1.01209	0.684109	1
Rps27l	8	12	5	14	19	7	5	6	8.7223	9.97349	7.4711	0.749096	-0.416777	0.688611	1
Cox7c	0	3	4	2	1	1	2	0	1.59841	1.31015	1.88668	1.44005	0.526114	0.693403	1
Phyh	2	0	1	3	1	0	6	1	1.67921	2.17417	1.18425	0.54469	-0.876492	0.695357	1
Rpl28	5	2	5	5	5	1	2	1	2.93597	2.23703	3.63492	1.62489	0.700339	0.704211	1
mt-Nd6	5	0	2	2	1	0	1	2	1.4892	0.92398	2.05443	2.22345	1.1528	0.704976	1
Rpl36al	2	3	5	4	5	0	0	2	2.12945	1.32868	2.93021	2.20536	1.14101	0.712594	1
Cox6b1	0	2	3	3	1	1	2	5	2.01227	2.44406	1.58049	0.646666	-0.628908	0.72104	1
Rps15	1	3	6	7	3	2	4	8	3.98885	4.60958	3.36813	0.730679	-0.452689	0.721306	1
Rexo2	0	1	5	3	2	0	2	0	1.43404	0.940834	1.92726	2.04845	1.03454	0.722961	1
Rps27a	0	2	0	5	4	1	2	1	1.56513	2.062	1.06825	0.518063	-0.9488	0.724633	1
Esp23	0	1	2	3	1	0	2	4	1.40326	1.67294	1.13359	0.677605	-0.561484	0.741414	1
Ltf	15	2	12	19	11	4	13	2	9.17043	8.3963	9.94455	1.1844	0.244152	0.745902	1
Tmsb4x	2	0	1	2	3	0	3	0	1.22739	1.41125	1.04354	0.73944	-0.435495	0.759569	1
Ndufb11	2	1	1	1	1	0	3	2	1.29997	1.51477	1.08517	0.716393	-0.481177	0.762593	1
Rpl13	1	1	1	2	2	1	1	2	1.31022	1.64334	0.977102	0.594581	-0.750054	0.763004	1
Scgb1b18	0	2	2	3	1	0	2	0	1.04087	0.765811	1.31593	1.71836	0.781028	0.764926	1
Fxyd3	0	3	4	3	2	1	0	2	1.68767	1.34795	2.02739	1.50405	0.588855	0.766593	1
Tceb2	4	8	3	3	2	6	2	0	3.93828	4.20688	3.66967	0.872302	-0.1971	0.766755	1
Spc24	0	6	3	8	6	0	2	8	3.2343	3.45518	3.01343	0.872148	-0.197356	0.771356	1
Obp2	2	2	6	9	2	1	3	5	3.31523	2.91448	3.71598	1.27501	0.350507	0.780516	1
Scgb2b27	10	22	8	41	28	7	10	24	15.7464	17.1077	14.385	0.840847	-0.250085	0.783706	1
Eif2s2	2	3	1	1	1	4	2	1	2.30991	3.16996	1.44986	0.457375	-1.12855	0.78491	1
Scgb1b2	1063	1933	1282	2681	1593	587	617	1881	1270.25	1207.17	1333.33	1.10451	0.143401	0.78727	1
Serf2	2	3	1	4	6	0	4	0	2.05185	2.23172	1.87199	0.838814	-0.253578	0.791251	1
Krtcap2	5	9	2	1	6	2	5	3	3.92548	4.29614	3.55482	0.827445	-0.273264	0.8014	1
mt-Nd4	7	10	2	15	10	1	4	6	5.52076	4.83684	6.20468	1.2828	0.359293	0.806371	1
Gm20594	46	30	41	97	34	33	22	57	42.3746	43.3393	41.4099	0.955483	-0.0656972	0.810004	1
Esp4	3	7	3	4	5	2	0	3	3.0117	2.64414	3.37926	1.27802	0.353907	0.812825	1
Rps4x	1	6	1	0	0	5	2	2	2.68673	3.76606	1.6074	0.426813	-1.22832	0.822827	1
Dad1	10	4	0	9	5	0	10	6	4.83666	5.18974	4.48357	0.863929	-0.211015	0.823428	1
Rps25	8	10	7	8	11	1	5	4	5.82247	4.85369	6.79125	1.39919	0.484595	0.830344	1
Rps11	3	6	8	10	10	5	6	3	6.1443	6.92465	5.36396	0.774619	-0.368442	0.830662	1
Rpl35a	1	2	2	6	0	0	1	5	1.70808	1.4293	1.98685	1.39008	0.475172	0.835901	1
Minos1	1	0	0	7	7	0	0	1	1.34285	1.45195	1.23376	0.849729	-0.234925	0.843992	1
Ndufs6	3	0	1	4	1	1	2	4	1.89551	2.21728	1.57374	0.709761	-0.494595	0.845144	1
Igkc	8	18	15	13	3	1	25	6	10.4425	9.81494	11.07	1.12787	0.173605	0.85465	1
Coa3	0	1	2	4	4	1	2	0	1.55476	1.83522	1.2743	0.694358	-0.526248	0.862565	1
2410015M20Rik	0	3	3	3	1	1	1	2	1.61558	1.46832	1.76283	1.20058	0.263729	0.867109	1
Ifitm2	5	11	9	20	9	7	14	8	9.89014	11.3354	8.44492	0.745006	-0.424676	0.868051	1
Rps9	0	4	1	7	5	3	1	2	2.61801	3.2571	1.97892	0.607571	-0.718876	0.874266	1
Bglap3	1	16	2	18	10	3	0	11	6.05304	5.87786	6.22822	1.05961	0.0835293	0.878498	1
Gm15662	6	2	5	9	0	8	8	4	6.03577	7.625	4.44654	0.583153	-0.778054	0.879874	1
Dnajc3	2	1	6	4	3	2	1	2	2.59639	2.36271	2.83008	1.19781	0.2604	0.882096	1
Ccl28	1	6	0	4	4	1	2	3	2.21063	2.51557	1.90569	0.757561	-0.400567	0.885285	1
Rpl11	0	3	2	11	5	2	1	2	2.66837	2.71276	2.62397	0.967272	-0.0480061	0.901652	1
Uqcrq	9	11	8	7	7	3	11	3	7.06704	6.78786	7.34622	1.08226	0.114045	0.902268	1
Rbx1	0	3	1	1	3	0	0	2	0.965467	0.978634	0.952301	0.973092	-0.0393512	0.911361	1
Cox7a2	1	3	5	1	6	0	1	2	2.0292	1.7991	2.2593	1.2558	0.328602	0.911584	1
Rpl18a	34	41	26	37	48	13	33	16	28.4367	28.8541	28.0194	0.971072	-0.0423497	0.913717	1
Myl6	2	1	4	3	2	0	2	2	1.77733	1.3944	2.16026	1.54924	0.631561	0.917413	1
Clstn1	2	0	0	3	1	1	1	2	1.19401	1.46832	0.919692	0.626356	-0.674945	0.929976	1
Esp31	5	6	6	12	6	6	4	8	6.46292	7.31201	5.61383	0.767755	-0.381283	0.932615	1
Rps5	2	1	4	0	2	0	0	2	1.27087	0.80361	1.73812	2.16289	1.11296	0.937002	1
Pip	1	2	1	3	2	1	1	0	1.24497	1.18978	1.30016	1.09277	0.12799	0.939491	1
Eva1c	2	2	3	2	3	0	2	3	1.86677	1.7962	1.93733	1.07857	0.109123	0.94283	1
Wfdc18	26	51	43	72	87	17	20	24	36.5532	35.8315	37.2749	1.04028	0.0569785	0.946357	1
Eef1a1	4	4	3	11	6	2	2	5	3.96475	3.86352	4.06599	1.05241	0.0736906	0.958851	1
Ndufb9	1	3	0	4	1	0	3	3	1.5501	1.74155	1.35866	0.780145	-0.358187	0.967067	1
Scgb2b2	1239	2143	1524	2975	2210	631	715	2267	1488.2	1455.6	1520.8	1.04479	0.0632157	0.979911	1
Rps3	8	9	1	6	5	0	8	6	4.66956	4.59896	4.74016	1.0307	0.0436283	0.983803	1
Ivd	2	2	1	3	2	1	3	1	1.77814	2.00735	1.54894	0.771632	-0.374014	0.984116	1
Uqcr10	0	7	3	2	3	1	3	3	2.49372	2.63594	2.3515	0.892093	-0.164733	0.984596	1
Rpl21	2	6	4	4	5	2	0	4	3.04181	2.87093	3.21269	1.11904	0.162267	0.988247	1
mt-Atp8	2	4	0	2	3	1	0	1	1.40228	1.29619	1.50836	1.16368	0.2187	0.990148	1
Mrpl33	1	1	1	4	4	0	0	2	1.20609	1.15366	1.25853	1.0909	0.12552	0.99081	1
Polr2f	3	2	0	2	4	0	0	2	1.27305	1.15366	1.39245	1.20699	0.271409	0.997735	1
Nedd8	1	3	3	2	3	2	2	0	2.03772	2.20454	1.8709	0.848658	-0.236744	1	1
Atp5g1	0	0	1	9	0	0	3	4	1.66213	1.79331	1.53096	0.853708	-0.228185	1	1
Chst1	5	1	0	5	0	1	4	3	2.26803	2.40626	2.1298	0.885106	-0.176077	1	1
Mrps21	0	5	1	1	2	0	3	1	1.39	1.46301	1.31699	0.900193	-0.151694	1	1
Spcs2	5	7	0	2	3	2	1	5	2.92239	3.04305	2.80173	0.920696	-0.119202	1	1
Srpr	6	4	2	6	4	1	7	2	3.68059	3.76575	3.59543	0.954771	-0.066774	1	1
Mien1	4	3	1	6	3	0	5	3	2.66668	2.68238	2.65097	0.98829	-0.0169929	1	1
Ndufs8	1	5	0	0	2	0	2	1	1.16406	1.16762	1.1605	0.993908	-0.00881621	1	1
Rps16	2	8	4	7	5	2	3	5	3.9917	3.98389	3.99952	1.00392	0.00564876	1	1
Ndufa4	2	2	1	3	0	0	2	4	1.52343	1.49791	1.54894	1.03406	0.048324	1	1
Rps18	9	18	10	10	13	3	12	7	9.3072	9.04052	9.57388	1.059	0.0826974	1	1
Pip	1653	5582	2568	4596	4396	890	1150	4279	2659.57	2563.97	2755.17	1.07457	0.103762	1	1
Atp5j2	1	3	0	8	7	0	1	1	1.83442	1.74734	1.92151	1.09968	0.137078	1	1
Car6	0	0	1	7	2	0	1	2	1.17427	1.099	1.24954	1.13697	0.185198	1	1
Mrps14	0	4	1	1	4	0	1	0	1.06507	0.995488	1.13465	1.13979	0.188767	1	1
Calm1	1	0	1	4	1	0	1	2	1.00008	0.92398	1.07618	1.16472	0.219986	1	1
Gnmt	1	2	1	2	3	0	0	2	1.06904	0.978634	1.15945	1.18476	0.244595	1	1
Rpl34	1	6	7	3	3	0	3	6	3.1944	2.77194	3.61687	1.30481	0.383844	1	1
Tmem258	2	0	2	3	3	0	1	1	1.24802	1.04725	1.4488	1.38344	0.468261	1	1
Rpp21	4	0	0	2	4	0	0	0	0.988316	0.700094	1.27654	1.82338	0.866615	1	1

## Sheet: LC-MSMS data
PROTEIN SYMBOLS	F1	F2	F3	F4	F5	F6	M1	M2	M3	M4	M5	M6	SequenceCoverage	Unique Sequence Coverage	Mean (FEMALES)	Mean (MALES)	DIFFERENCE(F-M)	FEMALES(LOG2)	MALES(LOG2)	FOLD DIFFERENCE	BASE MEAN	p-value	UNIPROT	PROXY
BPIFA6	54211000	12055000	1111450	12331500	48756000	3187950	6226050	0	0	0	0	1461150	17.4	17.4	21942150	1281200	20660950	24.3872	20.2891	4.09814	11611675	0.0123071	Q0VGU8	AMP
BPIFA2	4981600	840800	1897950	925740	938050	1514100	677140	1479450	395270	1128550	8419750	38569500	37.4	37.4	1.84971e+06	8.44494e+06	-6.59524e+06	20.8189	23.0097	-2.19079	5147325	0.0383734	B7ZCG3_P07743	AMP
BPIFB9B	14107000	4996700	14630500	9346000	12572500	12491500	4648500	7142850	6444950	7422700	12602000	11355500	24.9	24.9	1.13574e+07	8.26942e+06	3.08795e+06	23.4371	22.9794	0.457771	9.81339e+06	0.283054	A2AJD1_Q80XI7	AMP
ANXA1	34749000	34729000	31528000	15453500	49517000	7261350	11968000	42304000	32734000	11547500	13171500	12317000	52.6	52.6	28872975	2.06737e+07	8.19931e+06	24.7832	24.3013	0.481925	2.47733e+07	0.217245	P10107	annexin
ANXA2	69803500	78119500	75697000	53133000	74610500	31557500	36394500	96196000	63803000	22998000	41625500	41678500	63.1	63.1	6.38202e+07	50449250	1.33709e+07	25.9275	25.5883	0.33918	5.71347e+07	0.272133	P07356	annexin
ANXA7	0	0	365220	0	0	0	0	1126120	0	0	0	0	6.5	6.5	60870	187687	-126817	15.8935	17.518	-1.62451	124278	0.28366	Q07076	annexin
ANXA8	3756700	6783150	4220350	1269450	5294550	834450	0	7460100	2169550	4671950	1058500	773150	40.1	40.1	3.69311e+06	2688875	1.00423e+06	21.8164	21.3586	0.457833	3.19099e+06	0.357012	O35640	annexin
ANXA5	752450	1409850	1515000	873500	2076000	1827600	0	2196500	694700	968700	830850	1583000	15	15	1.40907e+06	1045625	363442	20.4263	19.9959	0.430374	1.22735e+06	0.439743	P48036	annexin
ANXA4	0	951175	420265	0	0	0	0	1604100	0	0	0	0	25.1	25.1	228573	267350	-38776.7	17.8023	18.0284	-0.226072	247962	0.666979	F7ANV6	annexin
CAH6	74979500	940305000	187650000	69503000	52847500	47243000	1178100000	228215000	333170000	312830000	149180000	242355000	48.9	48.9	2.28755e+08	4.07308e+08	-1.78554e+08	27.7692	28.6015	-0.83232	318031500	0.0422988	P18761	CA
CATL1	4183350	4769600	3102950	2882550	2164500	2992000	8327250	3141200	5468300	3354200	3431800	6135900	21.9	21.9	3.34916e+06	4.97644e+06	-1.62728e+06	21.6754	22.2467	-0.571316	4162800	0.275162	P06797	cathepsin
CATD	5657500	3835750	3695250	4586750	4013350	5277300	4126150	2413900	3107650	2740350	3997650	5503500	18.3	18.3	4.51098e+06	3648200	862783	22.105	21.7988	0.306257	4.07959e+06	0.461544	P18242	cathepsin
CATB	1214850	859285	1107450	0	0	0	448935	930460	0	1121150	0	0	16.8	16.8	530264	416758	113507	19.0164	18.6689	0.347502	473511	0.562531	P10605	cathepsin
CATZ	209715	283540	0	0	0	0	0	154685	0	0	0	226135	7.8	7.8	82209.2	63470	18739.2	16.327	15.9538	0.373219	72839.6	0.706797	Q9WUU7	cathepsin
ESP1	0	0	0	0	0	0	147330000	60722000	165020000	60695000	34410500	50274500	58.8	58.8	0	8.64087e+07	-8.64087e+07	0	26.3647	-26.3647	4.32043e+07	0.00128631	Q3LHH8	ESP
ESP38	0	4906700	5759950	0	0	0	99015500	10804500	15011500	8348650	8680450	51460500	60	60	1777775	3.22202e+07	-3.04424e+07	20.7616	24.9415	-4.17982	1.6999e+07	0.00974274	A8R0X1	ESP
ESP18	0	9717050	59819500	1886250	0	5565500	14666500	35344000	5217000	46012500	33616000	112455500	35.2	35.2	1.28314e+07	4.12186e+07	-28387200	23.6132	25.2968	-1.68362	2.7025e+07	0.0332199	A8R0V1	ESP
ESP4	495245	6616400	1077800	0	0	0	719100	0	0	0	0	0	22.2	22.2	1.36491e+06	119850	1.24506e+06	20.3804	16.8709	3.50949	742379	0.0490373	A8R0T8	ESP
ESP6	305210000	244670000	174955000	243350000	219230000	119250000	723225000	109640000	425385000	168980000	115279500	465925000	69.9	69.9	217777500	3.34739e+08	-1.16962e+08	27.6983	28.3185	-0.620182	2.76258e+08	0.0734523	A8R0U0	ESP
ESP3	0	0	0	0	0	0	0	0	1212800	0	0	1317100	23	23	0	421650	-421650	0	18.6857	-18.6857	210825	0.0792033	|J3QN49	ESP
ESP15	0	0	22001500	0	0	0	0	5080500	0	13397000	15420500	9777000	24.7	24.7	3.66692e+06	7.27917e+06	-3.61225e+06	21.8061	22.7953	-0.989206	5.47304e+06	0.129062	A8R0U8	ESP
ESP16	0	4163200	3962350	2026500	0	5213150	8980000	2662500	7954650	0	1786350	7330500	42.4	42.4	2.56087e+06	4.78567e+06	-2.2248e+06	21.2882	22.1903	-0.902088	3.67327e+06	0.162365	A8R0U9	ESP
ESP34	0	1451700	0	0	0	0	2772450	0	0	0	0	0	21.7	21.7	241950	462075	-220125	17.8844	18.8178	-0.933415	352012	0.314548	A8R0W6	ESP
CYT_AP5	0	0	0	0	0	0	231555000	18931000	1337350	17473000	8811700	137785000	28.3	28.3	0	6.93155e+07	-6.93155e+07	0	26.0467	-26.0467	3.46578e+07	0.00215768	Q6IE35	immunity
Igkv1-122	3340550	0	0	0	0	0	0	15952000	18728000	26150000	0	0	20	20	556758	1.01383e+07	-9581575	19.0867	23.2733	-4.18662	5.34755e+06	0.0198506	A0A087WNI1	immunity
Ighv1-31	346550	2023050	1082050	0	401350	354940	2219300	13955000	18899500	21098000	3004200	5466350	43.9	43.9	701323	10773725	-1.00724e+07	19.4197	23.361	-3.94129	5.73752e+06	0.0199004	A0A075B5V1	immunity
IGHAb	57531500	51607000	27139500	34538000	25987000	39500500	105515000	98712000	316525000	192810000	29351000	66210000	48.3	48.3	3.93839e+07	1.34854e+08	-9.54699e+07	25.2311	27.0068	-1.77572	87118875	0.019917	P01878	immunity
IGKC	19900500	16463000	12466500	15180000	16281500	23505500	27313500	47033000	173565000	85064500	24824000	32090500	81.1	81.1	17299500	64981750	-47682250	24.0442	25.9535	-1.9093	41140625	0.0245477	P01837	immunity
PIP	1318590000	1078300000	272420000	913355000	780860000	1014570000	1686050000	313580000	292445000	147325000	188700000	122361500	28.8	28.8	8.96349e+08	458410250	4.37939e+08	29.7395	28.7721	0.967422	6.7738e+08	0.0262407	P02816	immunity
IGJ	12640650	8695250	8070700	7120400	6233450	10656500	14050000	27041000	100848500	58841500	10086800	16738500	30.3	30.3	8902825	3.79344e+07	-2.90316e+07	23.0858	25.177	-2.09117	2.34186e+07	0.0263237	E9PWK4_P01592	immunity
LAC1	0	969450	1144830	0	0	0	3022650	5251700	10111450	9569700	579550	2673300	43.8	43.8	352380	5.20139e+06	-4.84901e+06	18.4268	22.3105	-3.88369	2.77689e+06	0.0276598	P01843	immunity
HVM40	0	717050	0	0	0	0	0	3550950	9811650	3933300	0	1615550	35.3	35.3	119508	3.15191e+06	-3032400	16.8668	21.5878	-4.72103	1.63571e+06	0.0295685	P01810	immunity
Igkv12-44	0	340560	0	307610	0	350865	1018070	1478050	10565550	2541350	0	544450	27.6	27.6	166506	2691245	-2.52474e+06	17.3452	21.3598	-4.01462	1.42888e+06	0.0337261	A0A087WNJ0	immunity
Igkv8-30	606965	359935	0	576600	990520	802305	0	4296350	3005800	12610500	452995	698100	44.3	44.3	556054	3.51062e+06	-2954570	19.0849	21.7433	-2.65843	2.03334e+06	0.0412697	A0A087WNJ3	immunity
HVM56	0	1615350	1844250	0	0	1165550	0	4175050	15148000	6403500	0	0	39.2	39.2	770858	4.28776e+06	-3.5169e+06	19.5561	22.0318	-2.47568	2.52931e+06	0.0421577	P18527	immunity
Igkv5-39	0	1022750	0	0	599500	0	0	2021750	3967450	2947350	766750	0	31.2	31.2	270375	1.61722e+06	-1.34684e+06	18.0446	20.6251	-2.58047	943796	0.0603402	A0A075B5M7	immunity
Igkv4-61	372425	981025	0	936095	489890	503550	534150	0	10627300	0	1068790	651600	30.5	30.5	547164	2.14697e+06	-1.59981e+06	19.0616	21.0339	-1.97226	1.34707e+06	0.069195	A0A075B5M2	immunity
SPG17	0	0	0	0	0	0	418915	0	0	1078800	1340950	0	0	0	0	473111	-473111	0	18.8518	-18.8518	236555	0.0736017	Q5S003	immunity
Igkv6-13	793730	236695	0	0	0	0	660300	723570	2762250	818140	0	430945	31.2	31.2	171738	899201	-727463	17.3899	19.7783	-2.38843	535469	0.086888	A0A075B5N7	immunity
Ighv6-3	0	274400	0	0	0	0	0	0	1148850	0	376040	912215	33.6	33.6	45733.3	406184	-360451	15.481	18.6318	-3.15079	225959	0.110689	A0A075B5T2	immunity
CYTB	0	3139900	4444800	0	0	0	0	5306350	3278600	8030600	0	1161200	57.1	57.1	1.26412e+06	2.96279e+06	-1.69867e+06	20.2697	21.4985	-1.22883	2.11345e+06	0.127336	Q62426	immunity
IGHAa	35846000	56029000	29249000	13831150	17747000	25062000	37752500	4123600	12071700	8993150	36278000	10582100	48.3	20.9	2.96274e+07	18300175	1.13272e+07	24.8204	24.1254	0.695073	2.39638e+07	0.133203	A0A075B6A3	immunity
CHIA	570750	0	187525	0	0	0	0	0	0	0	0	0	7.8	7.8	126379	0	126379	16.9474	0	16.9474	63189.6	0.246058	Q91XA9	immunity
CEACAM1	0	703950	2210050	0	0	0	0	877400	0	0	0	539350	9.4	9.4	485667	236125	249542	18.8896	17.8492	1.04041	360896	0.26795	Q3LFS9	immunity
CYTA	4179600	4447900	4181200	1880500	2683700	927550	1684650	3010150	740800	5220100	1599050	2052250	52.6	52.6	3050075	2384500	665575	21.5404	21.1853	0.355158	2.71729e+06	0.43961	P56567	immunity
CYTC	2406700	1333700	1317050	0	1840450	521950	2446200	1383750	2716600	760350	703000	1800450	25	25	1.23664e+06	1.63506e+06	-398417	20.238	20.6409	-0.402914	1435850	0.46044	P21460	immunity
MIF	1166800	1363450	1353400	514550	1238800	537400	468865	1490300	1057700	1154800	555100	423180	27.8	27.8	1.02907e+06	858324	170742	19.9729	19.7112	0.261742	943695	0.586805	P34884	immunity
ILEUA	2653950	4493250	2212750	2005850	2906500	0	786300	4382800	1614700	3657650	1059450	1299100	17.9	17.9	2.37872e+06	2.13333e+06	245383	21.1818	21.0247	0.157074	2256025	0.656232	Q9D154	immunity
Igkv8-19	0	0	0	0	410685	0	0	0	419425	0	0	0	38.2	29.4	68447.5	69904.2	-1456.67	16.0627	16.0931	-0.0303802	69175.8	0.9001	A0A087WNJ3	immunity
KLK1B9	413380	0	249630000	2720350	206595	73090	0	0	0	0	404190	0	44.4	44.4	4.21739e+07	67365	4.21065e+07	25.3298	16.0397	9.29011	2.11206e+07	0.0033361	P15949	kallikrein
KLK1B8	0	0	248680000	2001700	0	0	0	0	528750	0	944400	773650	64	64	4.17803e+07	374467	4.14058e+07	25.3163	18.5145	6.80184	21077375	0.00431535	P07628	kallikrein
KLK1B22	0	0	101233000	5961000	0	0	0	0	0	0	0	0	23.6	23.6	1.78657e+07	0	1.78657e+07	24.0907	0	24.0907	8.93283e+06	0.00850622	P15948	kallikrein
KLK1B5	0	0	81711000	428325	0	0	0	422435	0	532315	0	160250	32.6	32.6	1.36899e+07	185833	1.35041e+07	23.7066	17.5037	6.20295	6.93786e+06	0.0112282	P15945	kallikrein
KLK1B16	0	0	74170500	1409050	0	0	0	0	0	0	1094650	0	35.6	27.2	1.25966e+07	182442	12414150	23.5865	17.4771	6.10945	6.38952e+06	0.0123817	P04071	kallikrein
KLK1B3	0	0	50110500	1026040	0	0	0	0	0	0	0	0	50.2	39.5	8.52276e+06	0	8.52276e+06	23.0229	0	23.0229	4.26138e+06	0.0143651	P00756	kallikrein
KLK1B1	0	0	27072000	426315	0	0	0	0	0	0	0	0	31.4	18.8	4.58305e+06	0	4.58305e+06	22.1279	0	22.1279	2.29153e+06	0.0201411	P00755	kallikrein
KLK1	0	0	13258000	0	0	0	0	467660	0	2588200	0	0	23.4	11.5	2.20967e+06	509310	1.70036e+06	21.0754	18.9582	2.11721	1.35949e+06	0.0642075	P15947	kallikrein
KT33B	0	322495	331965	260405	85394000	370795	82255	0	0	0	0	0	57.9	57.9	14446610	13709.2	1.44329e+07	23.7842	13.743	10.0413	7.23016e+06	0.00973444	Q61897	keratin
KRT81	0	0	0	0	53743000	530650	0	0	0	0	0	0	32.4	32.4	9.04561e+06	0	9.04561e+06	23.1088	0	23.1088	4.5228e+06	0.0140498	Q9ERE2	keratin
KT33A	0	0	0	0	44536500	2517700	0	0	0	0	0	0	55.2	26	7.84237e+06	0	7.84237e+06	22.9029	0	22.9029	3.92118e+06	0.0156929	Q8K0Y2	keratin
K22Ob	42132000	22327000	14128000	33863500	0	33185500	54405500	0	0	0	0	0	24.2	15.3	2.42727e+07	9.06758e+06	1.52051e+07	24.5328	23.1123	1.42054	16670125	0.0477842	Q3UV17	keratin
K2C1Ba	0	0	870115	0	496825	0	689800	729850	4254450	0	666400	4053800	22.2	9.8	227823	1.73238e+06	-1504560	17.7976	20.7243	-2.92677	980103	0.0509378	Q6IFZ6	keratin
K1C9	336835000	321005000	627120000	1694200000	622645000	1928050000	723285000	358825000	392935000	471735000	994820000	782775000	71.3	71.3	921642500	6.20729e+08	3.00913e+08	29.7796	29.2094	0.570243	7.71186e+08	0.0593693	P35527	keratin
K1H1	0	0	482615	3202600	0	443545	0	287425	0	0	0	0	36.5	17.8	688127	47904.2	640222	19.3923	15.5479	3.84442	368015	0.0664813	Q9UE12	keratin
K2C4	102959500	67120500	78137500	42430000	60914000	9391200	24762500	82076000	40313000	6174250	23919500	32504000	62.3	55.8	6.01588e+07	3.49582e+07	25200575	25.8423	25.0591	0.783144	4.75585e+07	0.0868963	P07744	keratin
K2C1b	580630000	643065000	1321300000	3212850000	1305950000	4448950000	1587350000	858250000	965665000	1220650000	2261750000	2204650000	66.3	66.3	1.91879e+09	1.51639e+09	402405000	30.8376	30.498	0.339561	1.71759e+09	0.109353	P04264	keratin
KRT10	12416500	3700000	24056000	15603000	16447000	7698900	17826000	22409000	31043000	3587350	22080500	41636000	39.2	30.7	1.33202e+07	23096975	-9.77674e+06	23.6671	24.4612	-0.794085	1.82086e+07	0.119046	A2A513	keratin
K1C23	0	0	0	881725	0	625600	0	0	0	0	0	0	9.2	9.2	251221	0	251221	17.9386	0	17.9386	125610	0.126066	Q9C075	keratin
K22Ea	133980000	274970000	533235000	1559300000	512425000	2066550000	639620000	290790000	387010000	543120000	980000000	1153400000	87.4	87.4	8.46743e+08	6.65657e+08	1.81087e+08	29.6573	29.3102	0.347146	756200000	0.139104	P35908	keratin
K1C10	236975000	497805000	834170000	2066700000	787135000	2794600000	1084850000	449520000	654520000	773340000	1413500000	1465600000	62.9	62.9	1202897500	973555000	229342500	30.1639	29.8587	0.305179	1088226250	0.15117	P13645	keratin
K2C1a	12687500	3161650	34159000	13029000	20752500	8197000	15461000	24210500	33460500	3234950	25541000	40631500	34.4	30.6	1.53311e+07	23756575	-8.42547e+06	23.87	24.5018	-0.631865	1.95438e+07	0.165793	P04104	keratin
KRT36	0	1966500	1633100	0	0	0	0	0	0	0	2230800	5799400	18.8	16.9	599933	1.33837e+06	-738433	19.1944	20.352	-1.1576	969150	0.17527	B1AQ75	keratin
KRT84	0	2216150	2015350	0	935150	0	0	0	0	0	2788700	7729350	24.2	20.4	861108	1.75301e+06	-891900	19.7158	20.7414	-1.02557	1.30706e+06	0.181519	Q99M73	keratin
K2C78	324790	1548000	3584450	13320000	2857200	13448000	4462050	1559550	1806500	2209000	6603200	6552650	24.8	20.7	5.84707e+06	3.86549e+06	1.98158e+06	22.4793	21.8822	0.597063	4.85628e+06	0.248697	Q8N1N4-2	keratin
K2C6Ab	202230000	143710000	224140000	131660000	200745000	32472500	72784000	246660000	226385000	33847000	90234000	107475000	59	47.2	155826250	1.29564e+08	2.62621e+07	27.2154	26.9491	0.266272	1.42695e+08	0.290066	P50446	keratin
K1C15	220745000	159280000	178400000	106740000	153915000	8915200	101458000	212275000	212015000	16426500	70242500	77011500	65.3	56.9	137999200	114904750	23094450	27.0401	26.7759	0.264221	126451975	0.300066	Q61414	keratin
K2C5b	311895000	274125000	439740000	226635000	356990000	78069500	154245000	493345000	368905000	43776500	164425000	231325000	70.7	61.6	2.81242e+08	242670250	3.85722e+07	28.0672	27.8544	0.212817	2.61956e+08	0.322846	Q922U2	keratin
K1C17a	2716950	1950550	3170100	12842500	5952600	7931400	2281100	1943650	5918350	4949250	6843600	3251750	42.6	19.9	5.76068e+06	4197950	1.56273e+06	22.4578	22.0013	0.456555	4.97932e+06	0.32361	Q04695	keratin
K2C8	534350	0	1116200	0	1062800	0	0	948780	1894100	0	1629150	0	17.1	11.4	452225	745338	-293113	18.7867	19.5075	-0.720853	598782	0.335237	P11679	keratin
K1C14b	36571500	23684000	28798500	16910000	26735000	2959400	11516750	39820000	71693500	7644200	17026000	21445000	57.2	23.6	2.26097e+07	2.81909e+07	-5581175	24.4304	24.7487	-0.318286	2.54003e+07	0.348763	Q61781	keratin
K2C5a	14457500	15155000	31091000	79477500	27852500	113940000	40614500	17350000	24612000	42515000	61210500	46772500	53.4	20.7	4.69956e+07	38845750	8.14983e+06	25.486	25.2113	0.274768	4.29207e+07	0.355444	P13647	keratin
K2C80	1744150	1405350	1701350	1712000	1458350	1181700	0	2643250	1353700	0	825250	1528600	13.9	13.9	1.53382e+06	1.05847e+06	475350	20.5487	20.0135	0.53515	1.29614e+06	0.375751	Q0VBK2	keratin
K1C13b	1705400	782900	0	5008150	0	16379500	0	0	0	0	17813500	0	39.5	17	3979325	2.96892e+06	1.01041e+06	21.9241	21.5015	0.422587	3.47412e+06	0.385494	P13646-1	keratin
K2C6Aa	12539000	13673500	22995500	94521500	29160000	128450000	28299000	22930500	33363500	67347000	68870500	36297000	54.6	31	50223250	42851250	7372000	25.5819	25.3528	0.229018	46537250	0.407842	P02538	keratin
KRT12	117720000	252385000	334330000	119415000	204290000	19121500	65663000	344430000	237680000	25582000	118126000	149070000	57.5	57.5	1.74544e+08	156758500	1.77851e+07	27.379	27.224	0.155044	1.65651e+08	0.450307	Z4YJD9	keratin
K2C1Bb	1601700	2834150	3905550	12032500	3887600	15280500	7325100	2385650	3172550	2419400	7122050	10630000	28.9	23.2	6.59033e+06	5509125	1.08121e+06	22.6519	22.3934	0.258528	6.04973e+06	0.490324	Q7Z794	keratin
K2C71	0	0	0	0	1579200	0	2258750	0	0	0	0	0	12.4	4.6	263200	376458	-113258	18.0058	18.5221	-0.516329	319829	0.508158	Q3SY84	keratin
K1C14a	89664000	82077000	157780000	378850000	141250000	382685000	168200000	135550000	170650000	186150000	280370000	196700000	65	61.2	2.05384e+08	1.89603e+08	15781000	27.6138	27.4984	0.115342	1.97494e+08	0.531261	P02533	keratin
K1C19	37250000	41641500	37981000	23211500	27950500	2355800	27400000	80798000	43920000	5458200	16793500	13892500	65.5	57.1	2.83984e+07	3.1377e+07	-2978650	24.7593	24.9032	-0.1439	2.98877e+07	0.581212	P19001	keratin
K2C7	12002000	8939350	9793500	4189300	7559300	767850	3425700	26268500	10349300	668550	3493150	4153700	43.5	40.5	7208550	8.05982e+06	-851267	22.7813	22.9423	-0.161038	7.63418e+06	0.619195	Q9DCV7	keratin
K22Eb	3542550	1987950	11388000	20028500	2631700	3608450	13592500	7069550	2738650	0	6483900	9793350	46.8	35.9	7.19786e+06	6.61299e+06	584867	22.7791	22.6569	0.122265	6905425	0.677494	Q3TTY5	keratin
K1C16	7170350	8486650	14736500	75081000	19934500	58036500	15483500	17951500	23987000	48547500	41911000	27792500	57.3	38.9	30574250	2.92788e+07	1.29542e+06	24.8658	24.8034	0.062459	2.99265e+07	0.742166	P08779	keratin
K2C6B	15119000	5219850	22870000	5743500	13237500	0	5231150	24810000	15052500	1698500	6286800	6528500	57.7	11.9	10364975	9934575	430400	23.3052	23.244	0.0611865	10149775	0.769959	Q9Z331	keratin
K1C16b	291765	0	608730	0	1266250	0	0	434635	1490900	0	0	0	24.5	5.8	361124	320922	40201.7	18.4621	18.2919	0.17027	341023	0.782398	Q9Z2K1	keratin
K1C13	99202000	68705000	133580000	47678500	78739000	13937950	43150500	158035000	134265000	13133000	37839500	54278500	60.2	46.9	7.36404e+07	73450250	190158	26.134	26.1303	0.00373023	7.35453e+07	0.892755	P08730	keratin
MUP4	9053850	1611250	5061100	5615900	4026250	6686800	275215000	213180000	564460000	324290000	113008000	1142220000	64.6	64.6	5342525	4.38729e+08	-4.33386e+08	22.3491	28.7088	-6.35966	2.22036e+08	8.3e-06	P11590	liocalin
MUP20	1290050	3329100	2056600	916100	1573450	1883800	3777000	2940150	1507050	2135750	3935250	4435100	32.6	27.6	1.84152e+06	3.12172e+06	-1.2802e+06	20.8125	21.5739	-0.761445	2.48162e+06	0.220548	Q5FW60	liocalin
OBP7	4898400000	5947450000	1907400000	3776750000	2636900000	3805350000	4365400000	920305000	1184200000	1444150000	1181350000	974080000	78.9	78.9	3.82871e+09	1678247500	2.15046e+09	31.8342	30.6443	1.1899	2.75348e+09	0.00688797	KJ605394	lipocalin
OBP5	4002450000	4801950000	2023600000	3772850000	2443200000	3064850000	4921500000	989680000	1585150000	1556750000	1286600000	1179850000	79.8	79.8	3.35148e+09	1.91992e+09	1.43156e+09	31.6422	30.8384	0.803752	2635702500	0.0222822	KJ605392	lipocalin
MUP5	22413000	5050050	39918000	9715350	11932000	17957500	5047550	5445400	27914000	9442550	15558000	319355000	72.2	66.1	1.7831e+07	63793750	-4.59628e+07	24.0879	25.9269	-1.83903	4.08124e+07	0.0261245	P11591	lipocalin
LCN11	1892650000	906135000	581675000	854730000	758875000	1167750000	934675000	479705000	313525000	840230000	526025000	1001100000	56.7	56.7	1.02697e+09	6.82543e+08	3.44426e+08	29.9357	29.3463	0.5894	854756250	0.0539668	A2BHR2	lipocalin
FABP5	1658900	4862050	3690250	0	0	0	0	2365600	0	0	0	0	40	40	1.70187e+06	394267	1307600	20.6987	18.5888	2.10987	1.04807e+06	0.0744315	Q05816	lipocalin
MUP1_2_8_9_10_11_12_14_15_16_18_19	397185000	876285000	518955000	312120000	451755000	602695000	1068500000	521995000	288915000	579395000	1133855000	896180000	94	94	5.26499e+08	748140000	-2.21641e+08	28.9719	29.4787	-0.506877	6.3732e+08	0.0777676	P11588	lipocalin
RET2	0	0	3261950	1264900	4895150	760700	641350	7740650	658450	8819650	815050	1411000	14.2	14.2	1.69712e+06	3.34769e+06	-1.65057e+06	20.6947	21.6747	-0.98008	2.5224e+06	0.163145	Q08652	lipocalin
LCN13	7971750	0	4349400	4769550	4979950	5563700	0	2143450	1365150	3579750	5048200	3305200	27.3	27.3	4605725	2573625	2032100	22.135	21.2954	0.839626	3589675	0.175203	Q8K1H9	lipocalin
MUP10	0	0	1945550	1294250	0	0	0	1717200	1482300	0	0	2859550	76.5	6.1	539967	1.00984e+06	-469875	19.0425	19.9457	-0.903186	774904	0.259851	A2BIN1	lipocalin
MUP17_13	29946000	52340000	25090500	15734000	0	25605000	71154500	24763000	19200000	50170000	0	30209500	78.9	5.6	2.47859e+07	3.25828e+07	-7.79692e+06	24.563	24.9576	-0.394591	28684375	0.273195	B5X0G2_A2CEK6	lipocalin
OBP6	20281500	240255000	53558500	56244000	9036300	13236500	186710000	15759500	95296500	26771500	14789000	1341050	58.9	41.7	65435300	56777925	8657375	25.9636	25.7588	0.204739	6.11066e+07	0.4259	KJ605393	lipocalin
OBP1	1363900000	1574900000	672725000	807300000	728165000	723140000	2071750000	401645000	1161200000	519400000	611865000	734575000	72.8	72.8	978355000	9.16739e+08	6.16158e+07	29.8658	29.7719	0.0938467	9.47547e+08	0.503469	KJ605390	lipocalin
SODC	6247550	3342850	3669250	3870500	5718900	3030100	1146300	1956300	0	7848250	1848450	1265950	32.5	32.5	4.31319e+06	2.34421e+06	1.96898e+06	22.0403	21.1607	0.879655	3328700	0.169444	P08228	ROS
ATOX1	0	1787950	1408900	0	0	0	0	0	0	1060400	0	0	45.6	45.6	532808	176733	356075	19.0233	17.4312	1.59204	354771	0.177751	O08997	ROS
PRDX5	0	2235600	3091800	0	1196300	0	0	4268400	2815900	1834800	2630150	0	27.6	27.6	1.08728e+06	1924875	-837592	20.0523	20.8763	-0.824036	1.50608e+06	0.235718	P99029	ROS
GSTP1	1075950	1846300	974895	504100	539000	0	0	1188600	0	1015815	440240	0	12.9	12.9	823374	440776	382598	19.6512	18.7497	0.901502	632075	0.273485	P19157	ROS
GSTO1	133955000	351895000	195445000	94147500	142480000	100078500	97501500	234355000	103640000	275345000	89441000	63615500	65.8	65.8	1.69667e+08	143983000	2.56838e+07	27.3381	27.1013	0.236806	1.56825e+08	0.3201	O09131	ROS
PRDX6	15926500	33583500	16654000	8519400	11679000	6886800	7307150	23609500	7323450	24617500	7065250	4944800	75.9	75.9	1.55415e+07	1.24779e+07	3.06359e+06	23.8896	23.5729	0.316749	1.40097e+07	0.376174	O08709	ROS
OXR1	0	417365	816410	0	0	0	0	933700	0	1100600	0	0	6.1	6.1	205629	339050	-133421	17.6497	18.3711	-0.72145	272340	0.413369	E9Q0A7	ROS
PRDX1	5258850	6007200	4190750	5867750	6015550	5669800	4189000	7245400	4020800	2804350	6024200	2350800	18.2	18.2	5501650	4.43909e+06	1.06256e+06	22.3914	22.0818	0.3096	4.97037e+06	0.44571	B1AXW5	ROS
GSTM1	2353650	2763200	1392950	676850	2001250	623900	0	2547650	1258100	1691350	1376200	543000	24.8	24.8	1635300	1236050	399250	20.6411	20.2373	0.403818	1435675	0.44829	P10649	ROS
GSTA4	15388000	42720000	20673500	8721650	14473000	9264800	9060900	40804500	6817600	51604500	11528250	6993350	31.1	31.1	1.85402e+07	21134850	-2.59469e+06	24.1442	24.3331	-0.18897	1.98375e+07	0.527618	P24472	ROS
THIO	7481950	9834950	8571900	7811750	9226450	8400000	0	14397200	5729300	25712000	5786000	5091950	41	41	8554500	9.45274e+06	-898242	23.0283	23.1723	-0.144049	9.00362e+06	0.63522	P10639	ROS
PRDX2	3561450	6212250	4097800	4052900	3593750	4418000	2770850	5663600	1440650	7405500	4222100	3214000	35.9	35.9	4.32269e+06	4119450	203242	22.0435	21.974	0.0694782	4.22107e+06	0.777925	Q61171	ROS
GSTA3	2499800	2348500	4178900	1865700	2006100	901500	1233850	6648100	1571600	2321950	677450	799950	14.5	14.5	2.30008e+06	2.20882e+06	91266.7	21.1333	21.0748	0.0584124	2254450	0.807087	P30115	ROS
SCGB1B3	50641000	250760000	31234500	39375500	5763250	18215000	505090000	594290000	1232150000	784490000	192595000	506835000	39.8	39.8	6.59982e+07	6.35908e+08	-569910125	25.9759	29.2442	-3.26832	3.50953e+08	0.000240664	J3QJY4	SCGB
SCGB2A2	0	26173000	11558150	0	0	24852000	338910000	66673500	91124000	113010000	81909000	892685000	15.6	15.6	10430525	2.64052e+08	-2.53621e+08	23.3143	27.9762	-4.66194	1.37241e+08	0.000423237	J3KMP9	SCGB
SCGB1B19	0	0	0	0	0	0	7118200	0	0	0	7161450	760435000	15.1	15.1	0	1.29119e+08	-1.29119e+08	0	26.9441	-26.9441	6.45596e+07	0.000473029	F6WYW0	SCGB
SCGB2B7_SCGB2B20	0	316520000	25437500	3445750	15958200	9789500	306205000	175140000	1115650000	228370000	162440500	932595000	44.6	44.6	6.18585e+07	4.86733e+08	-424874925	25.8825	28.8586	-2.97609	2.74296e+08	0.000987552	D3YYY1_S2B20	SCGB
SCGB2B20	0	221952000	7333850	0	0	0	0	0	0	0	0	0	37.5	12.5	3.82143e+07	0	3.82143e+07	25.1876	0	25.1876	1.91072e+07	0.00386722	J3QK77	SCGB
SCGB2B3	17183500	150285000	5229300	5240900	677700	3901100	223995000	238320000	106930500	152960000	22948500	277755000	36.6	36.6	3.04196e+07	1.70485e+08	-140065250	24.8585	27.3451	-2.48657	1.00452e+08	0.0080166	D2XZ38	SCGB
SCGB1B20_SCGB1B29	5270300	811330000	40010000	6215200	2291850	4891350	624110000	196390000	1059360000	249985000	237180000	163626000	39.8	39.8	145001450	4.21775e+08	-2.76774e+08	27.1115	28.6519	-1.54041	2.83388e+08	0.0151535	E9PWZ2_D2XZ31	SCGB
SCGB1B24_SCGB1B20	14314000	21341500	2813100	11183000	3336650	27834500	217245000	8264350	14103000	11430000	74479000	97736000	26.1	26.1	1.34705e+07	7.05429e+07	-5.70724e+07	23.6833	26.072	-2.3887	42006675	0.0158423	B1B0N6	SCGB
SCGB2B2	1297000000	1324350000	586055000	1284150000	893110000	1175500000	1055300000	800650000	1377800000	368755000	521350000	1506400000	57.9	57.9	1.09336e+09	9.38376e+08	1.54985e+08	30.0261	29.8056	0.220532	1.01587e+09	0.236448	G5E8B4	SCGB
SCGB1B2	2437950000	1939150000	1380300000	3439650000	1882650000	2433150000	3001200000	1721650000	2915750000	888800000	1272455000	2657650000	54.8	54.8	2.25214e+09	2.07625e+09	1.75891e+08	31.0687	30.9513	0.117317	2164196250	0.384108	O35176	SCGB
SCGB2B24	164400000	285455000	66118000	57526500	39069000	54228500	210710500	80453000	195810000	81925500	51617000	150680000	29.5	29.5	1.11133e+08	1.28533e+08	-1.73998e+07	26.7277	26.9376	-0.20985	119832750	0.384755	Q7M747	SCGB
SCGB1B27	7611300	3704900	8995700	4623750	4453850	2733400	3626300	3742550	4791800	4374100	2913350	7308000	17.4	17.4	5.35382e+06	4459350	894467	22.3521	22.0884	0.263734	4.90658e+06	0.496647	Q91WB5	SCGB
TRYP	1105500000	714800000	1032600000	1581700000	1701200000	3414200000	917120000	1016150000	1225150000	1519900000	1243035000	1168600000	58.9	58.9	1.59167e+09	1.18166e+09	410007500	30.5679	30.1382	0.429724	1.38666e+09	0.0794938	P00761	trypsin
TRY1	3412900	0	3507850	4751200	7992450	0	4348550	0	7043200	4665250	4565300	0	8.1	8.1	3277400	3437050	-159650	21.6441	21.7127	-0.0686191	3357225	0.796365	P07477	trypsin
LACREIN	2972700000	1988650000	1181650000	2235950000	2047000000	3087950000	4368950000	663480000	2627200000	925745000	1594550000	2356050000	39.4	39.4	2.25232e+09	2.08933e+09	1.62987e+08	31.0688	30.9604	0.10837	2.17082e+09	0.410705	Q66VB7
DNAS1	651330000	319255000	368310000	584595000	437060000	619940000	50990000	49743000	34133000	104280000	34725000	54636500	27.1	27.1	4.96748e+08	54751250	4.41997e+08	28.8879	25.7064	3.18155	2.7575e+08	0.000497925	P49183
EGFB2	0	0	344705000	4940600	634300	367195	0	0	0	0	794405	567800	47.9	36	5.84412e+07	227034	5.82141e+07	25.8005	17.7926	8.00793	2.93341e+07	0.00244813	P36368
RENI2	0	0	231375000	11756500	0	0	0	0	0	0	0	0	41.4	41.4	4.05219e+07	0	4.05219e+07	25.2722	0	25.2722	2.0261e+07	0.00348548	P00796
LIPR1	55234000	5265650	726100	28982500	6218600	11440500	0	0	0	0	0	0	42.7	42.7	1.79779e+07	0	1.79779e+07	24.0997	0	24.0997	8.98895e+06	0.00838174	Q5BKQ4
APOE	0	1532650	0	0	1499850	0	15610000	166555	87461000	1433200	3532500	8039400	37.9	37.9	505417	1.93738e+07	-1.88684e+07	18.9471	24.2076	-5.26049	9.9396e+06	0.0102739	P08226
CUZD1	0	0	0	0	0	0	55318000	1467400	1656800	126880	3046850	3748400	23.6	23.6	0	10894055	-10894055	0	23.377	-23.377	5.44703e+06	0.013112	B2RU69
Gm12887	0	0	0	0	0	0	0	8527700	43456000	10735000	0	0	16.8	10.1	0	1.04531e+07	-1.04531e+07	0	23.3174	-23.3174	5.22656e+06	0.0133527	B1AVM1
PIGR	36020000	32032500	22052000	25780000	18959500	36028500	78128500	119225000	210910000	241350000	37965000	73019000	27.2	27.2	28478750	126766250	-98287500	24.7634	26.9176	-2.15421	77622500	0.0137344	O70570
MUC5A	28207000	0	1850700	0	1144770	0	0	182730000	32694500	1277500	7318450	0	20.9	20.9	5.20041e+06	3.73367e+07	-3.21363e+07	22.3102	25.1541	-2.8439	2.12686e+07	0.0166307	E9PWB6
TRFL	132060000	95253500	81314500	67506000	135395000	83321000	229500000	345655000	491715000	229450000	166830000	134020000	57	57	9.91417e+07	266195000	-1.67053e+08	26.563	27.9879	-1.42492	1.82668e+08	0.0215519	P08071
DMBT1	2527800	1787600	1519100	1301650	2059350	1928850	13210500	17872500	27164500	22803500	5862800	3867200	8.5	8.5	1.85406e+06	1.51302e+07	-1.32761e+07	20.8223	23.8509	-3.02867	8.49211e+06	0.0224149	E9QPG8
CRIS1	0	0	484315	0	0	0	0	14853500	0	10258200	0	882050	19.7	19.7	80719.2	4.33229e+06	-4.25157e+06	16.3006	22.0467	-5.74606	2.20651e+06	0.0252863	Q03401
CASK	577045	0	9164400	10916000	2307900	1903550	469145	209795	608800	0	0	537000	40.2	40.2	4.14482e+06	304123	3.84069e+06	21.9829	18.2143	3.76858	2.22447e+06	0.0284979	P02668
CASA1a	3936650	3324600	47326500	57229000	17512000	34020500	11538500	1981500	6469250	2665600	5678250	12069000	35.2	35.2	27224875	6.73368e+06	2.04912e+07	24.6984	22.683	2.01546	1.69793e+07	0.0285062	P02662
CF058	317745	0	0	0	0	0	2031000	1187100	5679800	2225150	916700	4140050	23.7	23.7	52957.5	2.69663e+06	-2.64368e+06	15.6926	21.3627	-5.67015	1.3748e+06	0.0294938	Q8C6C9
H12	4920150	0	5568600	5483250	4195150	4827200	1878050	0	0	0	0	0	18.9	18.9	4165725	313008	3.85272e+06	21.9901	18.2558	3.73429	2.23937e+06	0.0306141	P15864
FURIN	56249000	8996950	4567250	16631000	12050000	7975050	6257100	2744250	1154240	3780550	2658400	7564200	34.4	34.4	17744875	4.02646e+06	1.37184e+07	24.0809	21.9411	2.13982	1.08857e+07	0.0313278	P23188
ZA2G	0	0	0	0	0	0	2186150	0	2855000	1681550	655250	4508900	13.4	13.4	0	1.98114e+06	-1.98114e+06	0	20.9179	-20.9179	990571	0.0323319	Q64726
CASB	0	0	11519000	4557500	4434150	10479000	0	0	0	0	0	3939400	23.4	23.4	5.16494e+06	656567	4508375	22.3003	19.3246	2.97574	2.91075e+06	0.0334606	P02666
S10A8	0	0	5848800	0	929950	1601800	0	0	0	0	0	0	49.4	49.4	1.39676e+06	0	1.39676e+06	20.4137	0	20.4137	698379	0.0361743	P27005
S10A9	0	0	3695450	0	0	2729200	0	0	0	0	0	0	23	23	1070775	0	1070775	20.0302	0	20.0302	535388	0.0416432	P31725
TPM1	13438000	5253450	25587000	79627500	58887000	39927500	16530000	9040750	15584500	15110500	13006500	18178500	32	32	37120075	14575125	22544950	25.1457	23.797	1.34869	25847600	0.0444066	Q8BSH3
SVAL2	1504450000	1192650000	853330000	1250400000	1407550000	1503450000	1521900000	437780000	775905000	626565000	545165000	1082150000	79	79	1285305000	831577500	453727500	30.2595	29.6313	0.628188	1058441250	0.0450373	D3Z4E7
E9PZ00	63018000	64164000	6409000	19939500	50306500	17650500	17823500	8060350	27449500	5944400	7776500	21499000	27.8	27.8	3.69146e+07	14758875	2.21557e+07	25.1377	23.8151	1.32261	2.58367e+07	0.0455851	E9PZ00
DCPP1	27443500	2957300	6116300	2494950	2300200	621600	0	0	0	2195600	5389700	3543700	52.6	52.6	6988975	1.85483e+06	5.13414e+06	22.7366	20.8229	1.91379	4.4219e+06	0.0485975	L7N1X9
Gm5097_LIPO1	594355000	40425500	4717900	348485000	110390000	161155000	735650000	248710000	431020000	427840000	85982500	217405000	52.5	52.5	209921400	3.57768e+08	-1.47847e+08	27.6453	28.4144	-0.769175	2.83845e+08	0.0499253	J3QME6
CASA2	520550	0	15903350	6453350	2291600	4921900	1586400	479525	1967100	0	1801850	1669250	21.3	21.3	5015125	1.25069e+06	3.76444e+06	22.2579	20.2543	2.00356	3.13291e+06	0.0500332	P02663
TPM2	2230700	881510	6398600	23206000	18246000	10422000	2951050	1958800	4870550	3132900	3060150	3333900	31	19	1.02308e+07	3.21789e+06	7012910	23.2864	21.6177	1.66873	6.72435e+06	0.0500332	A2AIM4
Gm12886	0	188520000	135315000	6678950	20948500	3739000	115035000	3231300	24350500	2272150	4182700	25453000	54.6	54.6	5.92002e+07	2.90874e+07	3.01128e+07	25.8191	24.7939	1.02521	4.41438e+07	0.0578589	B1AZM5
ISG15	2966700	742050	0	0	0	0	0	0	0	0	0	0	20.5	20.5	618125	0	618125	19.2375	0	19.2375	309062	0.0588133	Q64339
A630073D07Rik	15485500	2729550	1586250	12312500	19049500	1046950	3972200	1616650	6213400	1837150	0	5089050	54	54	8.70171e+06	3.12141e+06	5580300	23.0529	21.5738	1.4791	5.91156e+06	0.0634025	E9PWS6
OS9	1632850	3220200	1705700	1943500	1138200	665550	10669000	1578250	7856700	2161650	1236475	6904550	25.9	25.9	1.71767e+06	5.06777e+06	-3.3501e+06	20.712	22.2729	-1.5609	3.39272e+06	0.0709461	Q8K2C7
PAM	6858750	3350450	2327350	3399300	2455700	1208900	2875750	0	0	0	942000	2169200	14	14	3.26674e+06	997825	2.26892e+06	21.6394	19.9284	1.71099	2.13228e+06	0.0740913	E9Q704
NUCB1	15366500	32178500	21048500	16743500	13608000	7796350	78123500	14329500	43540000	20806000	19101000	33670000	55.3	55.3	17790225	3.49283e+07	-1.71381e+07	24.0846	25.0579	-0.973313	2.63593e+07	0.075112	Q02819
AMY1	4480400	481535	1076950	1408150	598550	1585050	0	1103510	0	1210350	0	0	9.6	9.6	1.60511e+06	385643	1.21946e+06	20.6142	18.5569	2.05733	995375	0.0796349	P00687
Gm6619_APOA	16621000	2775550	6408450	4320250	5182550	3944150	0	2353850	3487950	3468900	4521350	1671300	37.2	37.2	6.54199e+06	2.58389e+06	3.9581e+06	22.6413	21.3011	1.34018	4.56294e+06	0.0810207	F6URP1
ACTN1	0	938700	1007150	2124200	1450550	1769050	4108200	2383200	3888950	3111050	2978650	4814050	30.6	14.5	1.21494e+06	3547350	-2.33241e+06	20.2125	21.7583	-1.54585	2.38115e+06	0.082083	A1BN54
GANAB	1211550	0	0	877950	2254900	0	0	0	0	0	0	647750	5.6	5.6	724067	107958	616108	19.4658	16.7201	2.74564	416012	0.0845228	Q8BHN3
XIRP2	0	7642750	0	0	0	0	0	1864250	0	0	0	0	0.6	0.6	1.27379e+06	310708	963083	20.2807	18.2452	2.03549	792250	0.0860581	Q4U4S6
HEXB	1422850	1126550	599100	1008020	1295900	948950	11147850	928385	3071700	534150	799500	1354050	14.9	14.9	1066895	2.97261e+06	-1.90571e+06	20.025	21.5033	-1.47831	2.01975e+06	0.0914274	P20060
PGRP1	3589200	2607600	1859750	0	1857200	0	2482450	6075950	8062350	4155700	1007800	2485300	37.4	37.4	1.65229e+06	4044925	-2.39263e+06	20.656	21.9477	-1.29164	2.84861e+06	0.103477	O88593
HBB1	15585500	9729450	19281000	19313000	22257500	23235000	15735500	17073000	15514500	20530000	98950000	22132500	77.6	77.6	18233575	3.16559e+07	-1.34223e+07	24.1201	24.916	-0.795878	2.49447e+07	0.107801	P02088
AMPN	791250	253515	673645	1430100	2216650	0	673880	0	705905	0	0	0	7.6	7.6	894193	229964	664229	19.7702	17.8111	1.95917	562079	0.109054	P97449
PSA6	1350250	1211850	1293450	1547400	654800	1741350	0	515100	461715	783050	764100	0	13.8	13.8	1299850	420661	879189	20.3099	18.6823	1.62761	860255	0.110722	Q9QUM9
HPT	124410000	69569500	70731500	57412500	63327500	49754000	240095000	49582000	68772000	84990000	80059000	137775000	34.3	34.3	7.25342e+07	1.10212e+08	-37678000	26.1122	26.7157	-0.603551	9.13732e+07	0.111046	Q61646
1433T	0	0	1058975	0	0	0	0	1367900	0	2448500	600250	0	29	21.2	176496	736108	-559612	17.4293	19.4896	-2.06028	456302	0.117469	P68254
CBR2	688950	2058250	724250	0	1412500	0	538300	798800	0	0	0	0	10.7	10.7	813992	222850	591142	19.6347	17.7657	1.86894	518421	0.118373	P08074
NUCB2	13003500	18840000	8965450	11860000	9077350	4295400	43755500	8125000	19385500	10484000	11888150	22651500	47.6	47.6	11006950	1.93816e+07	-8.37466e+06	23.3919	24.2082	-0.816273	1.51943e+07	0.121004	Q3UKN6
S100A16	1366950	1356700	1989000	1822750	1785250	0	418445	1654700	0	0	618650	574100	31.5	31.5	1386775	544316	842459	20.4033	19.0541	1.34922	965545	0.139436	D3Z2Y6
GGH	1181100	1045650	718400	0	0	0	3774900	1472800	0	0	0	2431750	12.6	12.6	490858	1.27991e+06	-789050	18.905	20.2876	-1.38266	885383	0.141295	Q9Z0L8
RAB11B_RB11A	801800	1565900	1804800	688950	948750	660850	0	1420200	0	0	818450	0	29.5	29.5	1.07851e+06	373108	705400	20.0406	18.5092	1.53137	725808	0.142	G3UY29_E9Q3P9
KCC2A	0	0	0	0	0	0	0	324510	379070	388345	0	393205	8.2	8.2	0	247522	-247522	0	17.9172	-17.9172	123761	0.143162	P11798
HBA-A1	10566700	8544350	10033050	15878000	17300500	11594500	10464950	10210450	6957600	13397500	63567500	17323000	57.7	57.7	1.23195e+07	2.03202e+07	-8.00065e+06	23.5544	24.2764	-0.721967	1.63198e+07	0.144332	Q91VB8
LPO	1310150000	857370000	422685000	444510000	493655000	341370000	1178750000	194825000	617110000	217315000	282950000	549310000	58.6	58.6	6.44957e+08	506710000	1.38247e+08	29.2646	28.9166	0.348042	5.75833e+08	0.149353	Q5SW46
VAT1	0	638100	0	0	620350	0	0	0	0	0	0	0	7.4	7.4	209742	0	209742	17.6783	0	17.6783	104871	0.149477	Q62465
GLYG	0	2477300	0	0	0	0	0	2813750	0	3884700	0	0	20.4	20.4	412883	1.11641e+06	-703525	18.6554	20.0904	-1.43506	764646	0.149676	Q9R062
B4GT1	0	294025	0	0	0	0	1788550	0	0	0	0	0	6.3	6.3	49004.2	298092	-249088	15.5806	18.1854	-2.60476	173548	0.149751	P15535
HBB2	5377100	1177850	5219500	7103450	7434050	7557650	4781100	4220800	6506550	6897500	29010000	8120800	61.9	28.6	5.64493e+06	9.92279e+06	-4.27786e+06	22.4285	23.2423	-0.813789	7.78386e+06	0.15073	P02089
AL1A1	1075000	5045150	2286700	0	996450	0	988400	979250	2037650	0	0	0	20	20	1.56722e+06	667550	899667	20.5798	19.3485	1.23126	1.11738e+06	0.1519	P24549
METK2	895655	832500	380810	0	641400	0	0	639960	0	0	0	0	9.1	9.1	458394	106660	351734	18.8062	16.7027	2.10356	282527	0.153693	Q3THS6
NPC2	2646350	814950	518100	0	3127100	0	1587350	436440	0	456225	504150	0	18.8	18.8	1.18442e+06	497361	687056	20.1757	18.9239	1.25181	840889	0.157751	Q9Z0J0
DSG1A	0	0	0	913650	0	3521250	0	0	0	803000	0	842600	1.5	1.5	739150	274267	464883	19.4955	18.0652	1.43028	506708	0.165129	Q61495
UPP1	2271050	2092550	1910450	742250	1137950	0	0	1960600	0	1487700	0	0	25.4	25.4	1.35904e+06	574717	784325	20.3742	19.1325	1.24167	966879	0.165701	P52624
RS3	0	0	1220900	0	0	1371350	0	1252850	1247750	1159100	1605900	1311200	21	21	432042	1.09613e+06	-664092	18.7208	20.064	-1.34318	764088	0.165809	P62908
TRFE_Gm20425	0	1306400	1434500	427165	1265550	0	0	2501500	1325950	2147150	3116200	608900	11.5	11.5	738936	1.61662e+06	-877681	19.4951	20.6245	-1.12946	1.17778e+06	0.168838	Q921I1_E9Q035
ARF1	3119250	2893000	3026300	3171400	3933850	2805900	0	3401100	1083700	1067750	4225250	0	27.6	27.6	3.15828e+06	1.62963e+06	1.52865e+06	21.5907	20.6361	0.954593	2.39396e+06	0.169095	P84078
CYT1	7895250	1060150	8218900	6766650	5902700	3871100	0	19263500	3178250	25389000	5084200	3358700	47.4	47.4	5619125	9.37894e+06	-3.75982e+06	22.4219	23.161	-0.73908	7.49903e+06	0.172938	P35175
PSCA	0	0	12969500	0	0	0	0	17591000	6120500	0	0	0	23.6	23.6	2.16158e+06	3.95192e+06	-1.79033e+06	21.0437	21.9141	-0.870464	3056750	0.181759	Q9D7U0
UB2Q1	151565000	89981000	94483000	125065000	56510000	171815000	92265000	44859850	93365000	121290000	83852500	79272000	0	0	1.14903e+08	8.58174e+07	29085775	26.7758	26.3548	0.421077	1.0036e+08	0.182207	Q7TSS2
PLEC	3829550	2820650	3605400	1097700	3705050	0	0	4236050	2570800	0	0	1044600	6.3	6.3	2509725	1308575	1201150	21.2591	20.3196	0.939532	1909150	0.185178	E9Q3W4
HS71B	33250000	55989500	27204500	16041500	30108500	15705000	11349000	34383000	12671000	36202000	16524000	11175500	39.9	38.2	29716500	2.03841e+07	9.33242e+06	24.8248	24.2809	0.543821	2.50503e+07	0.185884	P17879
QSOX1	17962000	11735000	7483100	12147500	11565000	8295300	40822500	8475600	12782500	6046600	9304800	28292500	27.9	27.9	1.15313e+07	17620750	-6.08943e+06	23.4591	24.0708	-0.611718	1.4576e+07	0.186207	Q8BND5
PLST	2486200	3595950	2014500	1043850	2490550	0	0	2382300	757450	1852250	953100	0	16.7	16.7	1.93851e+06	990850	947658	20.8865	19.9183	0.968208	1.46468e+06	0.189461	Q99K51
LACB	14580500	13244500	52290000	41778500	31517000	26714500	20168000	17413000	10682500	20921500	24641500	31275500	51.2	51.2	3.00208e+07	2.08503e+07	9170500	24.8395	24.3136	0.525894	2.54356e+07	0.194432	P02754
EEF1D	0	953550	722185	0	0	0	0	401210	0	0	0	0	24.7	24.7	279289	66868.3	212421	18.0914	16.0291	2.06235	173079	0.194589	D3YUQ9
TAGL2	327650	775875	555095	0	562115	0	0	598045	0	0	0	0	12.6	12.6	370122	99674.2	270448	18.4976	16.6049	1.8927	234898	0.195751	Q9WVA4
RPS28	0	0	693655	0	433385	0	0	827070	818885	707645	531750	343970	41.1	41.1	187840	538220	-350380	17.5192	19.0378	-1.51869	363030	0.197693	G3UYV7
TKT	59830500	124670000	73639500	38484500	36164500	21125000	21800000	81242500	41595000	54339000	34028000	26427500	52.8	52.8	5.89857e+07	4.32387e+07	15747000	25.8139	25.3658	0.448042	5.11122e+07	0.200946	P40142
ARGI1	0	709250	0	0	982850	0	0	454685	0	0	0	0	16.7	16.7	282017	75780.8	206236	18.1054	16.2096	1.89586	178899	0.208216	Q61176
EPIPL	1475000	0	0	0	0	0	0	393235	0	0	0	0	6	5.4	245833	65539.2	180294	17.9073	16.0001	1.90724	155686	0.211062	Q8R0W0
CCT4	566185	292485	228510	560775	298925	0	0	281615	0	0	0	277095	5.3	5.3	324480	93118.3	231362	18.3078	16.5068	1.80098	208799	0.211876	G5E839
HOP	0	0	651350	0	1441300	0	0	672900	0	0	0	0	61.6	61.6	348775	112150	236625	18.4119	16.7751	1.63686	230462	0.212166	Q8R1H0
ES8L2	644200	1809900	1852600	569750	637200	0	0	1831650	0	719950	0	0	14.7	14.7	918942	425267	493675	19.8096	18.698	1.1116	672104	0.217602	Q99K30
GRP78	24268500	27267500	15850000	20891500	21619500	17579500	12965000	15396500	16327000	13711000	17220000	14465000	37.9	37.9	2.12461e+07	1.50141e+07	6.232e+06	24.3407	23.8398	0.50088	1.81301e+07	0.223992	P20029
FGFP1	539025	2454300	687340	965550	1433500	0	2544000	829005	2407950	1313850	481685	3366400	17.5	17.5	1.01329e+06	1823815	-810529	19.9506	20.7985	-0.847918	1.41855e+06	0.226664	O70514
PRSS8	0	269300	295105	0	521725	0	0	898255	587850	826250	0	338830	7.1	7.1	181022	441864	-260843	17.4658	18.7532	-1.28744	311443	0.230548	Q99L44
IF4A1	1357750	0	0	0	1396750	1436250	0	1102600	0	0	0	871700	11.8	11.8	698458	329050	369408	19.4138	18.328	1.08586	513754	0.235029	P60843
CHM4B	0	0	0	0	275720	0	0	685000	0	354990	0	233660	11.2	11.2	45953.3	212275	-166322	15.4879	17.6956	-2.20767	129114	0.238481	Q9D8B3
ALBUc	27312000	32007000	30194000	18350500	52065000	26613500	18973500	39249000	30745000	57609500	81807000	20962500	51.3	47.7	3.10903e+07	41557750	-1.04674e+07	24.89	25.3086	-0.418651	3.6324e+07	0.241568	P07724
LIPO2	82238000	0	0	34114500	0	0	77395000	16898000	40794000	23971000	0	0	11.3	5.8	1.93921e+07	2.65097e+07	-7.11758e+06	24.209	24.66	-0.451051	22950875	0.246656	D3YY49
PTGES3	871525	447165	788895	397375	488970	0	0	774715	0	483710	0	0	23.1	23.1	498988	209738	289251	18.9286	17.6782	1.25042	354363	0.250133	D3Z7C6
TPM4	0	0	0	0	686950	0	0	1130200	0	744400	0	0	17.3	13.7	114492	312433	-197942	16.8049	18.2532	-1.4483	213462	0.259212	Q6IRU2
SH3L3	1032550	1444350	1392250	0	0	594700	385085	2601500	0	4326050	512400	0	31.2	31.2	743975	1.30417e+06	-560198	19.5049	20.3147	-0.809808	1.02407e+06	0.259734	Q91VW3
SET	1570900	1421750	1373150	1543000	1348050	1880350	0	985870	715500	1944450	1200800	552400	35.1	35.1	1.52287e+06	899837	623030	20.5384	19.7793	0.759054	1.21135e+06	0.264307	A2BE92
2210010C04Rik	0	0	0	0	0	12621000	0	7733000	0	0	0	0	13	13	2103500	1.28883e+06	814667	21.0044	20.2976	0.706726	1.69617e+06	0.266888	Q9CPN9
UBA52	14281500	11884500	13061500	15293500	18585500	23709500	7750450	11616000	9088700	15997000	14229500	12288500	35.4	35.4	16136000	1.18284e+07	4.30764e+06	23.9438	23.4957	0.448033	1.39822e+07	0.270697	E9Q9J0
GUAD	1342165	0	292135	738990	1311120	862745	0	654060	637975	1048615	0	151365	7.5	7.5	757859	415336	342523	19.5316	18.6639	0.86765	586598	0.277328	Q9R111
THIM	1997050	1727500	1875850	1692200	2172300	0	0	2083600	1528100	626900	921200	665600	17.1	17.1	1.57748e+06	970900	606583	20.5892	19.889	0.70023	1.27419e+06	0.278257	Q8BWT1
TGM2	8967500	12066500	20611500	8539100	18346500	5623550	5766300	29717000	4871250	42098500	11712450	6456200	31.5	31.5	1.23591e+07	1.67703e+07	-4411175	23.5591	23.9994	-0.440332	1.45647e+07	0.279461	P21981
PLAK	8818450	9570000	14317500	21848000	12174000	25275000	11156500	9942650	10401750	7498500	16536000	12866000	31.8	31.8	15333825	1.14002e+07	3.93359e+06	23.8702	23.4426	0.427654	1.3367e+07	0.285477	Q02257
ENO2	0	0	0	0	0	490745	0	0	393465	1013580	0	0	19	9.2	81790.8	234508	-152717	16.3197	17.8393	-1.51961	158149	0.286581	D3Z6E4
TBA1B	1441650	2452100	867600	0	748000	0	0	890250	723950	982100	0	654500	41.2	6	918225	541800	376425	19.8085	19.0474	0.761086	730012	0.291394	P05213
ACADL	216405	280570	206315	0	0	0	0	0	0	0	0	0	5.6	5.6	117215	0	117215	16.8388	0	16.8388	58607.5	0.292548	P51174
CALM	5305500	0	2496300	2906800	5562300	2934250	0	4999750	0	5142700	2640100	0	27.5	11.4	3.20086e+06	2130425	1.07043e+06	21.61	21.0227	0.587317	2.66564e+06	0.293618	P62204
CYB5B	0	0	489400	0	0	0	0	878360	470540	0	0	0	31.5	31.5	81566.7	224817	-143250	16.3157	17.7784	-1.46269	153192	0.303212	Q9CQX2
TBB5	8390950	7497100	6878200	10343000	12480000	12495500	0	6993450	8767100	10053250	17243500	0	55.4	19.4	9.68079e+06	7.17622e+06	2.50457e+06	23.2067	22.7748	0.431902	8.4285e+06	0.312963	P99024
VATG1	0	252455	0	0	0	0	0	554150	0	350815	0	0	23.7	23.7	42075.8	150828	-108752	15.3607	17.2025	-1.84181	96451.7	0.317759	Q9CR51
SPTBN2	0	0	181605	0	174865	0	0	523245	385685	0	120775	0	3	3	59411.7	171618	-112206	15.8585	17.3888	-1.53036	115515	0.318116	Q68FG2
PDXK	1451850	2379350	1217400	1200850	1433000	0	661800	3084450	1632800	5379150	849450	0	22.8	22.8	1.28041e+06	1.93461e+06	-654200	20.2882	20.8836	-0.595437	1.60751e+06	0.319759	Q8K183
ALDOAb	8461800	8298550	9250800	19133500	14559500	12498000	5981100	8332550	8052200	12161500	11426550	8815350	35.2	35.2	1.20337e+07	9.12821e+06	2.90548e+06	23.5206	23.1219	0.398676	10580950	0.32	P05064
ACTN4	34327500	47407500	30457000	18412000	33163000	18316000	17480000	32519500	18598000	36481000	21353000	18794000	54.3	54.3	3.03472e+07	24204250	6.14292e+06	24.8551	24.5288	0.326301	2.72757e+07	0.326805	P57780
SPB5	2755650	8940950	7100500	1904350	2229500	1539950	1588350	6179950	1507150	3611050	2596850	1993550	34.7	34.7	4.07848e+06	2.91282e+06	1.16567e+06	21.9596	21.474	0.485618	3495650	0.327037	P70124
AHNAK2	1794400	1566950	0	0	2228150	0	0	1443950	1458700	0	597300	0	23.5	23.5	931583	583325	348258	19.8293	19.1539	0.675384	757454	0.33088	F7CVJ5
S10AA	5388700	5169000	6884350	3996150	9098950	1112500	3236850	9715700	5164400	0	2083000	2846850	45.4	45.4	5.27494e+06	3.84113e+06	1.43381e+06	22.3307	21.8731	0.457623	4.55804e+06	0.334174	P08207
DESP	11859500	10642000	16468500	29652000	15985500	35178000	15722000	15560500	14154000	9414700	21422500	18477000	17.6	17.6	19964250	1.57918e+07	4.17247e+06	24.2509	23.9127	0.338245	1.7878e+07	0.343444	E9Q557
PPIA	22588000	27559500	19074500	12247500	19825000	17407500	7566800	22384000	13258000	24723000	16348500	10904500	57.3	57.3	1.97837e+07	1.58641e+07	3.91953e+06	24.2378	23.9193	0.318541	17823900	0.360863	P17742
AHNAK	48622000	38285000	51956500	23438000	46736000	7182550	11101000	70819500	41076500	11618500	23799000	19374000	29	29	36036675	2.96314e+07	6.40526e+06	25.103	24.8206	0.282338	3.2834e+07	0.361635	E9Q616
PDIA3	9729750	10220500	6763100	5307050	8653300	4717200	5559500	7685500	8229750	4385450	5086600	4028350	33.5	33.5	7565150	5.82919e+06	1.73596e+06	22.8509	22.4749	0.376073	6.69717e+06	0.367602	P27773
WDR1	3525950	4363100	3185650	1020000	2851000	1183150	961850	3902650	973200	4343500	1466950	0	22.8	22.8	2.68814e+06	1.94136e+06	746783	21.3582	20.8886	0.469543	2314750	0.368448	O88342
TCTP	0	760050	1241100	0	680350	0	0	614200	0	944600	0	0	15.7	15.7	446917	259800	187117	18.7696	17.987	0.782602	353358	0.369535	P63028
MUC4	11064500	14048000	19699500	14022000	14565000	11322300	2828600	16316500	13799500	20423500	6700900	7622750	8	8	1.41202e+07	1.1282e+07	2.83826e+06	23.7513	23.4275	0.323745	1.27011e+07	0.375402	E9Q7Q
MAL2	0	766050	1732600	0	727000	0	0	3415000	929250	0	592150	0	17.7	17.7	537608	822733	-285125	19.0362	19.6501	-0.613868	680171	0.376224	Q8BI08
CLIC1	3081800	5474300	2399150	1432800	2796700	1750150	1502450	2534100	1492250	4195850	1611550	1125400	37.8	37.8	2.82248e+06	2.07693e+06	745550	21.4285	20.986	0.44251	2.44971e+06	0.377361	Q9Z1Q5
RPLP0	883770	398345	1075400	572350	1126600	874890	220895	643065	320815	669985	755100	720305	14.5	14.5	821892	555028	266865	19.6486	19.0822	0.56639	688460	0.377544	D3YVM5
CAPG	9845350	15475000	10336500	5874550	10759000	4531250	2479950	15150500	4472800	14559500	5201950	2786250	41.5	41.5	9470275	7441825	2028450	23.175	22.8272	0.34775	8456050	0.377751	Q99LB4
ARPC3	0	288215	509570	0	0	0	0	274550	0	0	0	0	14.9	14.9	132964	45758.3	87205.8	17.0207	15.4818	1.53891	89361.2	0.378465	D3Z2F7
ZFP185	616960	666795	240040	339375	1036400	0	0	766925	363465	577455	0	0	9.3	9.3	483262	284641	198621	18.8824	18.1188	0.76366	383951	0.378506	A2BI37
AL3A1	165400000	328300000	139150000	71740000	126365000	62191500	69072000	278530000	69495500	242810000	64072500	53452500	58.9	58.9	148857750	1.29572e+08	1.92857e+07	27.1494	26.9492	0.200179	1.39215e+08	0.381834	P47739
EF1A1	24619000	29860000	21226000	22271000	28343500	26814500	11708500	24978000	15871000	24730500	31314000	17457000	32.7	32.7	2.55223e+07	2.10098e+07	4512500	24.6053	24.3246	0.280696	2.32661e+07	0.383917	P10126
COX5A	683850	0	0	0	0	0	0	1342800	0	0	0	0	16.4	16.4	113975	223800	-109825	16.7984	17.7719	-0.973486	168888	0.386846	P12787
ALBUa	22879500	15601000	26365000	62437500	64322000	102315000	30422500	18382500	28059500	30793500	99771500	40794000	52.9	52.9	4.89867e+07	4.13706e+07	7.61608e+06	25.5459	25.3021	0.243784	45178625	0.387411	P02768
ES8L1	392870	1345650	674070	0	0	0	0	860520	0	566405	0	0	8.2	8.2	402098	237821	164277	18.6172	17.8595	0.757671	319960	0.392257	Q8R5F8
PKP1	462050	1107150	1035215	1397300	542200	788500	0	1414100	1310900	0	742800	0	6.9	6.9	888736	577967	310769	19.7614	19.1406	0.620767	733351	0.392332	P97350
1433G	907660	609060	1579600	1267250	1695050	2004050	492340	1637000	1601750	2601700	3304750	1533200	21.9	17.8	1.34378e+06	1861790	-518012	20.3579	20.8283	-0.470395	1.60278e+06	0.39434	P61982
RINI	3293200	8243450	2959750	1917550	3234050	2103700	1605150	8497750	1845950	12541000	2257550	1760800	32.7	32.7	3.62528e+06	4.75137e+06	-1.12608e+06	21.7897	22.1799	-0.390249	4188325	0.394407	Q91VI7
ACSL1	0	0	292840	0	0	0	0	740770	0	0	0	0	4.3	4.3	48806.7	123462	-74655	15.5748	16.9137	-1.3389	86134.2	0.395278	D3Z041
PDC6	0	896465	758715	0	0	0	0	880300	0	0	0	0	7.2	7.2	275863	146717	129147	18.0736	17.1627	0.910916	211290	0.395942	Q9WU78
KCRB	0	0	2704100	2848450	3757350	3595750	0	2416100	2332500	3270050	5974550	3481550	18.9	18.9	2.15094e+06	2.91246e+06	-761517	21.0365	21.4738	-0.437269	2531700	0.395992	Q04447
CAP1	1516800	2325550	1371900	1236050	1567500	0	0	1812950	0	2400750	1372200	0	22.4	22.4	1336300	930983	405317	20.3498	19.8284	0.521416	1.13364e+06	0.399485	P40124
HSPB1	25917500	70269000	47773500	22742000	27109000	7114500	14158500	91435500	17804000	65702000	31952000	18210500	69.4	69.4	3.34876e+07	3.98771e+07	-6.3895e+06	24.9971	25.2491	-0.251934	3.66823e+07	0.400465	P14602
MFGM	61879500	48839500	27877500	44518000	39890500	21423000	71541500	18287000	44558000	16202000	22556000	33398500	38.2	38.2	40738000	3.44238e+07	6.31417e+06	25.2799	25.0369	0.242967	3.75809e+07	0.401361	P21956
FILA2	3173700	3574100	8358500	22918500	11652500	24974000	9586950	4885900	6366550	11381500	11706850	16504000	16.6	16.6	1.24419e+07	1.0072e+07	2369925	23.5687	23.2638	0.304861	1.12569e+07	0.403187	Q5D862
Gm8991_EG627828	1439000	1323300	1064400	1378350	1732300	1237800	0	1456500	811300	670800	1681100	1214400	20	20	1362525	972350	390175	20.3779	19.8911	0.486735	1.16744e+06	0.406008	E9Q7H5_B2RXM2
HORNa	14749000	12796500	26009000	52654000	29300000	57073500	27878500	16107500	14499000	26792500	34816500	42372500	15.8	15.8	32097000	27077750	5019250	24.9359	24.6906	0.245331	29587375	0.41317	Q86YZ3
CH60	0	971275	1667900	2379700	2652250	3066150	1053185	1607700	2228600	2182550	5336450	2039500	10.1	10.1	1.78955e+06	2.408e+06	-618452	20.7712	21.1994	-0.42824	2.09877e+06	0.416083	P63038
ACON	1995150	1868700	2010250	2323800	2499100	2665100	802350	1801300	2421950	1101250	3107600	820050	9.7	9.7	2.22702e+06	1675750	551267	21.0867	20.6764	0.410305	1.95138e+06	0.416232	Q99KI0
HORNb	842540	0	1413200	1370600	1111000	0	902190	1174230	1287250	0	1231000	2154700	13.9	13.9	789557	1124895	-335338	19.5907	20.1014	-0.510675	957226	0.418448	Q8VHD8
ASC	2367800	3140900	1744600	770000	1946350	788600	0	2838450	1137700	2803300	686200	490780	39.4	39.4	1.79304e+06	1.32607e+06	466970	20.774	20.3387	0.43525	1.55956e+06	0.420871	Q9EPB4
EZRI	1989650	2123550	1867550	1769950	1063250	1666100	0	1309200	1125750	2019100	1800750	1489850	8.5	8.5	1746675	1290775	455900	20.7362	20.2998	0.436373	1518725	0.421826	P26040
COF1	0	1475450	3193100	0	3807900	0	0	2416150	1539250	1909000	5671400	0	19.3	19.3	1.41274e+06	1.92263e+06	-509892	20.4301	20.8747	-0.444586	1.66769e+06	0.423386	P18760
MCG140784	41615000	25434000	31917000	20151500	31269500	81436000	33540000	30630000	22631000	58822500	11169500	41246500	18.7	18.7	3.86372e+07	3.30066e+07	5.63058e+06	25.2035	24.9763	0.227235	35821875	0.425402	Q792Z1
EIF5A_IF5A2	1126850	0	733850	0	846400	1180240	0	1488900	1339750	828750	1856000	0	20.1	20.1	647890	918900	-271010	19.3054	19.8095	-0.504158	783395	0.42556	A0A0A0MQM0_Q8BGY2
ALD1	1792850	3021000	1164790	1362000	1981500	0	633350	4524900	717150	4297700	1343200	985385	16.5	16.5	1553690	2.08361e+06	-529924	20.5673	20.9907	-0.423389	1.81865e+06	0.430174	P21300
FLG2	233310	0	822510	502200	1259250	0	0	278380	551165	0	378390	725145	10.1	9.4	469545	322180	147365	18.8409	18.2975	0.543395	395862	0.438988	E9QPZ3
H2AFZ	11451500	10216350	10047050	11531000	14162500	13367500	4275250	11368000	8774000	6060500	17370500	10817000	31.4	31.4	1.1796e+07	9.77754e+06	2.01844e+06	23.4918	23.221	0.270752	1.07868e+07	0.441071	Q3UA95
MYL1	350710	0	926000	2710200	2563150	1501200	0	739235	1288800	0	2830550	1092645	28	28	1.34188e+06	991872	350005	20.3558	19.9198	0.436026	1.16687e+06	0.441668	E9PWG4
TRFE	1206835	648300	1456600	2124050	1875100	5594250	0	1785850	1737300	2151700	1971600	2223900	10.8	10.8	2.15086e+06	1.64506e+06	505798	21.0365	20.6497	0.386772	1.89796e+06	0.442988	Q29443
CALL3	37674000	57526500	42220500	30322000	39182000	36773000	16333000	61348000	26858500	126540000	34175500	16628500	78.5	78.5	4.06163e+07	4.69806e+07	-6364250	25.2756	25.4856	-0.210005	4.37985e+07	0.447361	Q9D6P8
FCGBP	17468500	19936500	15784500	15106500	12055000	15847500	22852000	10209000	16036000	15652000	0	16209000	7.9	7.9	1.60331e+07	13493000	2.54008e+06	23.9345	23.6857	0.248841	1.4763e+07	0.449593	E9Q9C6
KPYM	10443200	11406500	11561500	16123000	14207500	20452000	7851200	10865000	8990600	13234000	17744500	12205000	30.3	30.3	1.40323e+07	11815050	2.21723e+06	23.7422	23.4941	0.248124	1.29237e+07	0.457768	P52480
FRIH	622530	752250	244045	435855	530695	0	179460	439290	179530	847425	0	180395	18.7	18.7	430896	304350	126546	18.717	18.2154	0.501606	367623	0.46151	P09528
TALDO	1247650	1108150	1036885	1022780	1363000	471135	0	1711850	471755	1621500	415595	458420	13.6	13.6	1041600	779853	261747	19.9904	19.5728	0.417526	910727	0.471519	Q93092
DEST	7781650	12935500	7861550	3567650	5382850	3272450	2688450	11697500	4453700	7713250	3724850	3512800	47.3	47.3	6800275	5.63176e+06	1.16852e+06	22.6972	22.4252	0.272008	6.21602e+06	0.472598	Q9R0P5
EVPL	14921500	13595500	27417000	8960800	17141000	0	4545300	28077000	18672500	0	8606400	9950750	26.7	26.7	1.36726e+07	1.1642e+07	2.03064e+06	23.7048	23.4728	0.231953	1.26573e+07	0.479228	Q9D952
VDAC1	2470700	2659800	2661400	1253450	3734100	3297800	1201700	428540	2672150	2802200	4393900	1391950	18.2	18.2	2.67954e+06	2.14841e+06	531135	21.3536	21.0348	0.318719	2.41397e+06	0.479494	Q60932
CF132	355900	907585	931725	0	834415	0	0	1295550	496615	340555	0	0	7.5	7.5	504938	355453	149484	18.9457	18.4393	0.506443	430195	0.483876	Q91Z58
AGR2	29973000	41718000	17312000	15423500	20439500	15768500	61311000	10050300	34838500	10461500	12909700	32194500	45.1	45.1	2.34391e+07	2.69609e+07	-3.52183e+06	24.4824	24.6844	-0.201953	25200000	0.491527	O88312
GLNA	725645	274035	443680	1165650	1270900	1074815	0	297875	1123750	546600	1684450	0	12.6	12.6	825788	608779	217008	19.6554	19.2156	0.439851	717283	0.494747	P15105
CALR	4183850	5775250	5957750	3030350	3826000	2314300	3338700	7847700	6150900	5658900	4170100	3128500	41.1	41.1	4181250	5.04913e+06	-867883	21.9955	22.2676	-0.272101	4.61519e+06	0.501651	P14211
ENOA	12636000	12105500	11707000	10751700	12633000	14764000	5931950	12383000	8332900	14571500	14295500	8605750	39.4	39.4	1.24329e+07	1.06868e+07	1746100	23.5677	23.3493	0.218334	1.15598e+07	0.504133	P17182
RLA2	3735800	3334950	2557450	3081850	3846550	3405100	0	3259450	3401400	3179250	3900050	2606000	67	67	3326950	2.72436e+06	602592	21.6658	21.3775	0.288284	3.02565e+06	0.504739	P99027
IQGA1	2451450	2862900	2630500	0	2177600	0	1201450	2746750	1465200	1726000	0	1024550	7.7	7.7	1687075	1.36066e+06	326417	20.6861	20.3759	0.310219	1.52387e+06	0.507195	Q9JKF1
TBB4A	0	0	0	0	760740	845455	0	132880	343060	387565	386810	0	52.3	6.3	267699	208386	59313.3	18.0303	17.6689	0.361354	238042	0.507809	Q9D6F9
KCY	1023550	2998950	1946350	0	1882650	997550	0	2504900	0	3552400	842600	0	42.3	42.3	1.47484e+06	1.14998e+06	324858	20.4921	20.1332	0.358947	1.31241e+06	0.508531	Q9DBP5
RL8	513650	0	859980	907635	1052815	967835	0	982990	0	0	1730555	444130	10.5	10.5	716986	526279	190707	19.4516	19.0055	0.446116	621632	0.509801	P62918
D3Z7K0	0	0	0	0	283510	0	0	0	0	569200	0	0	28.4	28.4	47251.7	94866.7	-47615	15.5281	16.5336	-1.00552	71059.2	0.510838	D3Z7K0
1433S	27431000	37896500	19642000	15915500	21817500	19276000	8714000	27593000	13703000	50951000	13982500	9795350	60.1	60.1	2.36631e+07	2.07898e+07	2873275	24.4961	24.3094	0.186762	2.22264e+07	0.51317	O70456
MPCP_ MCG10343	0	0	484165	0	0	902600	0	0	866650	0	0	0	6.2	6.2	231128	144442	86685.8	17.8183	17.1401	0.678198	187785	0.513195	Q8VEM8_G5E902
GLOD4	0	1443950	391485	0	0	0	0	1111550	0	1436050	0	0	19.8	19.8	305906	424600	-118694	18.2227	18.6957	-0.473015	365253	0.514971	F6ZTG3
A1AT	822350	0	2202800	1456000	3644000	5428050	1120200	2798400	2858600	4197350	3203050	2498250	15.1	15.1	2.25887e+06	2.77931e+06	-520442	21.1072	21.4063	-0.299127	2.51909e+06	0.51722	P34955
RSSA	2488700	2405950	1957950	1792850	3044750	2041900	541400	2387300	1861350	2104850	2714650	1618300	28.1	28.1	2.28868e+06	1.87131e+06	417375	21.1261	20.8356	0.29047	2.08e+06	0.517253	P14206
GDIB	1598150	2193900	1759700	723600	831950	0	0	1981050	841100	1847500	914500	0	14.2	14.2	1184550	930692	253858	20.1759	19.8279	0.347964	1.05762e+06	0.521627	Q61598
FILA	661070	556665	1246750	3983950	2089200	4130950	1309500	1310300	1322600	2711650	1547950	2155200	3.2	3.2	2.11143e+06	1726200	385231	21.0098	20.7192	0.290621	1.91882e+06	0.521975	P20930
PSME1	1207100	1213150	1134000	954385	1111850	343125	0	1690000	1029285	1787700	0	0	27	27	993935	751164	242771	19.9228	19.5188	0.404023	872550	0.524017	G3UXY0
CTTN	169900	0	157855	0	0	0	0	411150	0	179705	0	0	5.5	5.5	54625.8	98475.8	-43850	15.7373	16.5875	-0.850175	76550.8	0.524324	Q921L6
REEP5	626550	511800	1329450	0	1699700	677850	322685	1200600	1546150	680700	0	0	11.1	11.1	807558	625022	182536	19.6232	19.2536	0.369658	716290	0.532979	G3X8R0
PPL	33037000	28718500	47040000	19414500	33802000	0	11475000	53540500	36582500	6704550	17267000	18714000	39.5	39.5	27002000	2.40473e+07	2.95474e+06	24.6866	24.5194	0.167194	2.55246e+07	0.536058	G5E898
GDIR1	1889500	2262850	1831100	1802950	2498200	940400	610550	2709600	1460950	4641550	2695850	1520800	38.7	38.7	1.87083e+06	2.27322e+06	-402383	20.8353	21.1163	-0.281054	2072025	0.539544	Q99PT1
CH10	2601700	0	2565750	1243700	1570650	0	0	1248600	2729000	2879850	1802100	1228150	35.3	35.3	1330300	1647950	-317650	20.3433	20.6522	-0.308921	1489125	0.544564	Q64433
TPIS	7079300	7248700	5847750	7665900	8481200	7664400	4558000	6748800	5458800	10547500	6538050	4287400	41.8	41.8	7.33121e+06	6356425	974783	22.8056	22.5998	0.205835	6.84382e+06	0.549427	P17751
FPPS	0	494505	0	0	0	0	0	266500	0	0	0	0	8.2	8.2	82417.5	44416.7	38000.8	16.3307	15.4388	0.891835	63417.1	0.550382	Q920E5
HNRNPK	1911000	1762850	1672150	1852350	2197350	2397150	670050	1353600	884850	2403600	2887000	1619250	12.5	12.5	1965475	1.63639e+06	329083	20.9064	20.6421	0.26436	1.80093e+06	0.55117	B2M1R6
TCO2	30777500	15084000	7321500	12243500	7679350	7312550	38138000	4671850	7864850	4567950	6092450	9772200	26.7	26.7	1.34031e+07	1.18512e+07	1551850	23.6761	23.4985	0.177528	1.26271e+07	0.556938	O88968
ENPP3	0	608700	926055	538350	432260	0	0	1722100	0	0	0	0	8.7	8.7	417561	287017	130544	18.6716	18.1308	0.54085	352289	0.557668	Q6DYE8
CYC	1844150	0	2615150	1707300	1754600	0	1192800	1213200	0	1465600	1163850	1561350	23.8	23.8	1320200	1.09947e+06	220733	20.3323	20.0684	0.263952	1.20983e+06	0.560224	P62894
CHST1	4212050	2957750	1877550	1458850	1397650	1276800	4519050	862515	1563850	527200	1669900	1969450	13.4	13.4	2196775	1.85199e+06	344781	21.067	20.8206	0.246307	2.02438e+06	0.563386	Q9EQC0
IDHC	0	249365	217425	0	246810	0	0	409100	0	535605	0	0	8	8	118933	157451	-38517.5	16.8598	17.2646	-0.404745	138192	0.566564	O88844
RNPEP	0	1397750	523750	0	0	0	0	1155850	0	1363650	0	0	9	9	320250	419917	-99666.7	18.2888	18.6797	-0.390903	370083	0.567245	E9PYF1
CAN1	1629500	2747950	1883050	0	914150	0	556650	4285500	1404250	1977850	0	550850	15.7	15.7	1195775	1.46252e+06	-266742	20.1895	20.48	-0.290507	1.32915e+06	0.569079	O35350
NHRF1	0	0	0	0	179065	0	0	301570	0	145735	0	0	9	9	29844.2	74550.8	-44706.7	14.8652	16.186	-1.32075	52197.5	0.57127	P70441
SNAA	0	419320	0	0	0	0	0	490335	0	259990	0	0	9.5	9.5	69886.7	125054	-55167.5	16.0928	16.9322	-0.839455	97470.4	0.572954	Q9DB05
DPYL2	0	0	0	616750	1255800	0	0	0	0	1130300	1297050	0	5.6	5.6	312092	404558	-92466.7	18.2516	18.626	-0.374377	358325	0.581029	O08553
MYH9	885800	1646750	1510600	1534900	1860750	1901100	0	1762300	1618350	2171650	791250	1487150	7.6	6	1556650	1.30512e+06	251533	20.57	20.3157	0.254266	1.43088e+06	0.587386	Q8VDD5
HIST2H2BB_H2B1P	8814300	4768800	11421500	12604500	15186000	13800500	4903250	9717300	13393000	12243500	22792000	11730000	30	30	1.10993e+07	12463175	-1.36391e+06	23.404	23.5712	-0.167207	1.17812e+07	0.589311	G3X9D5_Q8CGP2
AT1B1	1526750	450870	1574800	970350	987150	0	713200	729850	1810250	824100	922800	1703000	16.1	16.1	918320	1117200	-198880	19.8086	20.0915	-0.282818	1017760	0.592739	P14094
PGK1	6433300	5952950	6072400	5801400	7020150	7003250	3200900	5105150	4089250	8055450	9267550	4097300	30	30	6380575	5.63593e+06	744642	22.6053	22.4262	0.179032	6.00825e+06	0.592797	P09411
CAST	0	1029700	871790	444225	1009570	0	0	863975	968700	822580	0	0	8.5	8.5	559214	442542	116672	19.093	18.7555	0.337584	500878	0.593817	Q8CE80
ETFB	0	0	286630	0	0	0	0	488720	0	0	0	0	12.2	12.2	47771.7	81453.3	-33681.7	15.5439	16.3137	-0.769806	64612.5	0.597502	Q9DCW4
LGALS3	2218550	7478400	2113800	1129000	3342900	0	0	6110900	2491500	3143350	1249550	1113650	19.3	19.3	2713775	2.35149e+06	362283	21.3719	21.1651	0.206725	2.53263e+06	0.599286	Q8C253
CN37	1529700	0	1354800	2088850	1867100	2662750	0	1329000	1469400	1754100	2049800	1509650	7.6	7.6	1.58387e+06	1.35199e+06	231875	20.595	20.3667	0.228364	1.46793e+06	0.600979	P16330
H15	2000700	1513100	1796200	2194000	2143500	2196300	688950	1528100	2086400	936350	3034050	1920200	5.8	5.8	1.97397e+06	1.69901e+06	274958	20.9127	20.6963	0.216405	1.83649e+06	0.602232	P43276
1433E	5893600	5311400	5738400	5841300	5994400	6277050	1442800	5646850	4158450	10379950	6541000	2900150	49	45.1	5.84269e+06	5178200	664492	22.4782	22.304	0.174182	5.51045e+06	0.60361	P62259
ADT1	2938900	0	2150850	3062100	3939100	4790300	0	3076050	3191200	1589250	5116600	1714450	15.4	15.4	2.81354e+06	2447925	365617	21.424	21.2231	0.200828	2.63073e+06	0.60439	P48962
AQP5	2035900	2169300	3470600	1584400	2394100	0	751300	6917400	1334765	1616900	810650	2214900	12.1	12.1	1.94238e+06	2.27432e+06	-331936	20.8894	21.117	-0.227607	2.10835e+06	0.605768	Q9WTY4
ENPL	0	470100	0	0	0	0	0	286740	0	0	0	0	9.9	8.4	78350	47790	30560	16.2577	15.5445	0.713213	63070	0.606871	P08113
CAZA2	0	2314500	1610350	0	808100	0	0	1841850	0	2029000	0	0	21.7	21.7	788825	645142	143683	19.5893	19.2993	0.290089	716983	0.608216	P47754
AT1A3	4826900	3081700	4782300	7910000	8209500	11783000	3827700	4853300	8652650	9115100	11674700	7350350	14.8	14.8	6.76557e+06	7.57897e+06	-813400	22.6898	22.8536	-0.16379	7.17227e+06	0.618299	Q6PIC6
EF2	3225450	3562850	3234700	3565400	4259500	4519400	2327500	3154200	2835100	3475950	5196700	2776500	12.7	12.7	3.72788e+06	3294325	433558	21.8299	21.6516	0.178374	3.5111e+06	0.618689	P58252
LDHB	0	0	1865800	1068450	2947100	3299700	797200	1201450	1062100	2075900	3539250	2157200	26.3	20.2	1530175	1.80552e+06	-275342	20.5453	20.784	-0.238715	1.66785e+06	0.618822	D3Z7F0
PLET1	647050	3478750	3254550	0	2516600	1250150	0	6690900	2166900	3875400	0	0	7.6	7.6	1857850	2122200	-264350	20.8252	21.0171	-0.191927	1990025	0.620432	Q8VEN2
DNJB9	853805	1489750	628035	695235	701540	374310	2016600	595570	1385500	674950	0	857135	21.6	21.6	790446	921626	-131180	19.5923	19.8138	-0.221514	856036	0.6239	Q9QYI6
CPNS1	829740	1783800	803245	0	749110	0	0	1318700	417860	1318600	450460	0	6.2	6.2	694316	584270	110046	19.4052	19.1563	0.248956	639293	0.624498	D3YW48
PGAM1	2598950	2408700	2154350	3186300	3174450	3817050	653750	2546400	2195350	3780200	3801350	2362350	37.8	37.8	2.88997e+06	2.55657e+06	333400	21.4626	21.2858	0.176845	2.72327e+06	0.63156	Q9DBJ1
ALDR	2284900	3435050	1819050	1190850	2202600	779900	1072400	3654650	880350	3907100	703450	0	29.7	29.7	1.95206e+06	1.70299e+06	249067	20.8966	20.6996	0.196925	1827525	0.636349	P45376
RPTN	2347050	0	3960200	2102950	1589700	0	555450	1871900	1697500	0	1131150	3554650	18.3	18.3	1666650	1.46844e+06	198208	20.6685	20.4859	0.182665	1.56755e+06	0.636672	P97347
1433B	1838750	1544900	1669650	1432950	1713900	0	1192600	1761950	1421000	3564900	989150	600750	28.9	21.1	1.36669e+06	1.58839e+06	-221700	20.3823	20.5991	-0.216879	1.47754e+06	0.637535	Q9CQV8
RPL15	96230	0	0	0	90485	0	0	170510	100000	95380	0	98325	15	15	31119.2	77369.2	-46250	14.9256	16.2395	-1.31393	54244.2	0.637701	B8JKK2
H4	22145000	15162500	26098500	26110000	30871000	30592500	14663000	22742000	30909000	24715000	46550500	24018000	43.7	43.7	25163250	27266250	-2103000	24.5848	24.7006	-0.115798	26214750	0.640888	P62806
CCT8	0	0	239960	0	534850	0	0	0	0	294840	714600	0	4.5	4.5	129135	168240	-39105	16.9785	17.3602	-0.381638	148688	0.648091	H3BL49
ACTB	264985000	298370000	294480000	210680000	297420000	251325000	111310000	313605000	201510000	458215000	289370000	169220000	66.4	66.4	2.69543e+08	257205000	1.23383e+07	28.0059	27.9383	0.0675985	2.63374e+08	0.650797	P60710
RTN4	0	526380	0	0	0	0	0	303205	496440	0	0	0	13.5	13.5	87730	133274	-45544.2	16.4208	17.024	-0.603249	110502	0.652017	Q8BH78
6PGD	0	0	2433100	774150	0	0	0	2574700	0	1218350	0	0	14.5	14.5	534542	632175	-97633.3	19.0279	19.27	-0.242021	583358	0.654548	Q9DCD0
TBA1A	33439000	37856500	29925500	34559000	39640000	42780500	19127500	26525000	28395500	40557000	62320000	26993000	41.2	41.2	36366750	3.39863e+07	2.38042e+06	25.1161	25.0185	0.0976653	3.51765e+07	0.654581	P68369
ACTR3	835750	0	2030200	734500	1695900	0	0	1596000	1562350	681850	762600	0	40.3	40.3	882725	767133	115592	19.7516	19.5491	0.202486	824929	0.6581	A0A087WRA1
KCRU	0	0	0	0	931750	0	0	0	723300	0	0	0	10.3	10.3	155292	120550	34741.7	17.2446	16.8793	0.365346	137921	0.663859	P30275
Gm3839_G3P	14189500	13725000	16920500	14705500	18164500	16410500	6736400	14176000	12913500	15348000	26262000	11976500	34.8	34.8	1.56859e+07	1.45687e+07	1.11718e+06	23.903	23.7964	0.106594	15127325	0.669959	S4R1W1_P16858
ALBUb	23046500	13655500	22000000	33706500	34732500	77192000	18658500	27809500	30692000	46270000	35318500	33192500	40.7	34.4	34055500	3.19902e+07	2.06533e+06	25.0214	24.9311	0.0902593	3.30228e+07	0.673228	P02769
NFL	0	0	525200	0	1319000	2438500	0	525350	600900	1215950	1573750	1160150	11.8	10.1	713783	846017	-132233	19.4451	19.6903	-0.2452	779900	0.675585	P08551
FBX50	13005500	30874000	18151500	8129500	3874500	5670650	5278400	22098500	9128900	20266000	9060600	8258000	40.2	40.2	13284275	12348400	935875	23.6632	23.5578	0.105395	1.28163e+07	0.679593	G3X9C2
MBP	27389000	13364500	23889000	39235000	39546000	55463500	15665500	21818000	32320500	41561500	42254500	33458000	33.2	33.2	3.31478e+07	3.11797e+07	1.96817e+06	24.9824	24.8941	0.0883091	32163750	0.679618	F7A0B0
PSME2	0	270565	0	0	0	0	0	163455	0	0	0	0	29.1	29.1	45094.2	27242.5	17851.7	15.4607	14.7336	0.727061	36168.3	0.682564	E0CZ90
PARK7	0	442360	280935	0	0	0	0	454950	0	458015	0	0	30.1	30.1	120549	152161	-31611.7	16.8793	17.2152	-0.335973	136355	0.683386	A2A815
PPIB	3009300	2977400	2383450	2527900	1298100	1958200	4024250	1961100	1098950	1923400	1252950	2583000	11.1	11.1	2.35906e+06	2.14061e+06	218450	21.1698	21.0296	0.14019	2.24983e+06	0.689477	P24369
EFHD2	938775	1294300	1125850	510200	788430	0	0	2094850	928100	1618850	552300	0	21.7	21.7	776259	865683	-89424.2	19.5662	19.7235	-0.157301	820971	0.694589	Q8C845
MYPR	0	0	4260900	5683300	6092300	9655950	1945000	4059250	4820200	6976550	8052950	2317050	8.7	8.7	4282075	4.69517e+06	-413092	22.0299	22.1627	-0.132866	4.48862e+06	0.697245	P60202
SPR1A	4927800	4273550	3428050	0	4672450	1526800	0	4630450	3034550	3843000	2681800	3049250	48.6	48.6	3.13811e+06	2873175	264933	21.5815	21.4542	0.127249	3.00564e+06	0.697402	Q62266
ROA2	4262250	2594600	4080700	4181550	4831200	4227800	2445050	3886000	4863450	4216050	6785450	4123000	22.1	22.1	4.02968e+06	4386500	-356817	21.9422	22.0646	-0.122404	4.20809e+06	0.703303	O88569
HS90A	2652200	2048300	2901650	3444200	4511900	5268600	2419150	2636450	2719200	4641300	7028750	3266600	17.7	8.6	3.47114e+06	3.78524e+06	-314100	21.727	21.852	-0.124975	3.62819e+06	0.704664	P07901
CLH1	3315750	2668750	2890900	3361100	3267250	4341450	2562000	2788450	2553050	3120500	4403950	2832400	9.4	9.4	3.30753e+06	3.04339e+06	264142	21.6573	21.5372	0.120076	3.17546e+06	0.705295	Q68FD5
MCG129038	3887900	2308300	1455200	3559300	6067700	897650	0	3859300	1309700	4766600	3309450	3390900	27.6	27.6	3.02934e+06	2.77266e+06	256683	21.5306	21.4028	0.127734	2901000	0.706274	G3X9V8
NDKB	3793750	4484500	3126850	3886550	4721450	4039550	1973250	4375650	2912350	4094800	5596650	3280750	28.3	28.3	4008775	3705575	303200	21.9347	21.8213	0.113464	3857175	0.708805	Q01768
CLUS	10599050	14954000	4500350	4890450	5281450	3398050	22629500	3244900	7187650	3541900	1994350	2098200	25.4	25.4	7.27056e+06	6782750	487808	22.7936	22.6934	0.100196	7.02665e+06	0.710315	Q06890
TBB4B	32112000	37145000	32575500	36345500	44375500	53829000	19349500	30470000	35151500	49647500	57446000	32818000	59.1	59.1	3.93971e+07	3.74804e+07	1.91667e+06	25.2316	25.1596	0.0719518	38438750	0.711004	P68372
MYL12A_MYL12B	1995650	2480350	2263650	1610800	2621450	1749450	717700	2731050	1444100	3082350	2097850	1598400	24.4	24.4	2120225	1.94524e+06	174983	21.0158	20.8915	0.124268	2.03273e+06	0.714224	Q6ZWQ9_Q3THE2
AATM	1216450	0	1212950	0	1922300	902000	0	1247900	758350	543850	2076900	1283950	8.4	8.4	875617	985158	-109542	19.7399	19.91	-0.170056	930388	0.720299	P05202
PTMA	466220	0	933125	0	2059000	1359350	0	995345	578700	2010200	770900	1077450	35.1	35.1	802949	905432	-102483	19.615	19.7882	-0.173298	854191	0.721651	P26350
MDHM	3356350	2304950	2785450	4543350	5243150	5378050	2572700	3049800	4470850	3707600	7400700	4241850	25.7	25.7	3.93522e+06	4.24058e+06	-305367	21.908	22.0158	-0.10782	4087900	0.727046	P08249
PDIA1	6243650	6003550	4232350	5416150	5388900	5268650	5054100	4450400	5048500	5259100	6084550	4562300	29.7	29.7	5.42554e+06	5.07649e+06	349050	22.3713	22.2754	0.0959354	5.25102e+06	0.727469	P09103
LMNB1	1016370	326875	1957950	871565	1050210	0	0	1812150	1040150	0	1025200	799345	15.1	15.1	870495	779474	91020.8	19.7315	19.5721	0.159335	824985	0.72917	P14733
TCPB	0	0	0	0	413575	0	0	0	0	0	530100	0	4.5	4.5	68929.2	88350	-19420.8	16.0728	16.431	-0.358111	78639.6	0.731369	P80314
GELS	603400	1981250	1848450	0	0	0	0	1726100	919650	2270950	0	0	12.8	12.8	738850	819450	-80600	19.4949	19.6443	-0.149374	779150	0.732133	P13020
OVOS	18978500	13013000	5778800	9587050	10336000	6417800	9764600	12296500	11806000	11001000	5256300	10469000	18.3	18.3	1.06852e+07	10098900	586292	23.3491	23.2677	0.0814146	1.0392e+07	0.732689	Q3UU35
G6PD1	1760950	2749100	1804500	0	1362050	0	0	2766150	1395550	2831700	0	0	20.8	20.8	1.27943e+06	1.16557e+06	113867	20.2871	20.1526	0.134473	1222500	0.739253	Q00612
MYH14	3172550	3507350	3292600	1077750	4033950	0	0	6603200	3489850	4086000	1350300	710050	14.8	14.8	2.51403e+06	2.70657e+06	-192533	21.2616	21.368	-0.10646	2610300	0.744315	K3W4R2
LYPD2	1562150	2468800	2950700	1528500	1787100	0	612200	2895650	2656200	1258350	1701500	2025400	26	26	1.71621e+06	1.85822e+06	-142008	20.7108	20.8255	-0.114694	1.78721e+06	0.757436	Q9DD23
MDHC	3384800	3718550	3192250	3491700	4399250	4202900	2066750	3032350	2708550	4637650	5681600	3003150	21.6	21.6	3731575	3521675	209900	21.8314	21.7478	0.0835229	3626625	0.75917	P14152
PCBP1	1181100	1473500	1077905	1219450	1243000	1448050	880655	1314050	1034575	1107350	1747300	1045000	10.7	10.7	1.27383e+06	1188155	85679.2	20.2807	20.1803	0.100454	1.23099e+06	0.76229	P60335
CO1A2	6335850	3498400	7322450	8725650	10339650	12801500	5457950	8320650	8706650	11430000	9857550	7784600	5.3	5.3	8.17058e+06	8592900	-422317	22.962	23.0347	-0.072706	8.38174e+06	0.767029	Q01149
RAC1	0	989205	1292150	439700	1289350	0	0	1185950	663515	714860	1015180	852505	14.6	14.6	668401	738668	-70267.5	19.3504	19.4946	-0.144213	703535	0.767311	P63001
PPBT	0	557960	1019650	0	0	0	0	795680	0	0	0	625305	5.3	5.3	262935	236831	26104.2	18.0044	17.8535	0.150849	249883	0.767809	P09242
VATA	815545	938210	916115	977055	1131850	530800	414740	945765	810995	1329150	1388750	828665	10.5	10.5	884929	953011	-68081.7	19.7552	19.8621	-0.106931	918970	0.77239	P50516
CO1A1	10823800	6300850	13911000	15030000	15916500	24878000	8543250	12620000	13263500	21257000	14179500	13600000	5.7	5.7	1.44767e+07	1.39105e+07	566150	23.7872	23.7297	0.0575533	1.41936e+07	0.772689	P11087
S6A14	0	788650	1800150	0	1216050	0	0	2278450	820900	502950	0	593400	8.3	8.3	634142	699283	-65141.7	19.2744	19.4155	-0.141072	666712	0.775917	Q9JMA9
SPB11	1294450	1630700	539450	929860	944230	0	3643300	326465	0	0	460675	1227100	7.5	7.5	889782	942923	-53141.7	19.7631	19.8468	-0.083689	916352	0.778963	Q9CQV3
PEBP1	3527550	5601700	2634900	2827900	3351100	3298350	1721650	5006100	1974550	8420250	3227400	2066150	40.6	40.6	3540250	3.73602e+06	-195767	21.7554	21.8331	-0.0776496	3.63813e+06	0.779012	P70296
MYG	688550	473995	746900	1194700	1111090	1220600	393060	529760	539500	742750	2385450	513950	11.7	11.7	905972	850745	55227.5	19.7891	19.6984	0.0907404	878359	0.781519	P04247
CAN2	181350	379675	195445	0	415785	0	0	643255	0	502365	0	0	3.3	3.3	195376	190937	4439.17	17.5759	17.5427	0.0331577	193156	0.785411	O08529
Gm5428_RL6	465265	694860	743410	698920	1175015	393205	251145	963885	751415	742365	1072050	680960	6.8	6.8	695112	743637	-48524.2	19.4069	19.5042	-0.0973513	719375	0.78956	E9PUX4_P47911
APRV1	95845500	145670000	98436500	44336500	52854500	47873000	39300500	113415000	37919000	199060000	36315000	47566000	48.4	48.4	80836000	78929250	1906750	26.2685	26.2341	0.0344379	79882625	0.792606	Q09PK2
MYH8	715300	753500	1969750	3498650	3897350	2443450	619350	594300	2470000	0	7888950	2349650	8.6	8.6	2213000	2320375	-107375	21.0776	21.1459	-0.0683545	2.26669e+06	0.792971	P13542
CLD11	259750	0	0	907280	416870	587050	0	225495	321750	415335	1377300	0	6.8	6.8	361825	389980	-28155	18.4649	18.573	-0.108108	375902	0.797577	Q60771
LDHA	5979250	6813000	4803950	5041400	6217700	5155450	3230400	7573550	3968050	8064800	6428550	3572650	21.4	21.4	5.66846e+06	5473000	195458	22.4345	22.3839	0.0506245	5.57073e+06	0.804515	P06151
GDIR2	1303800	1277550	1282100	1030300	1429900	0	485745	1770800	401480	2796800	0	568300	38.5	38.5	1.05394e+06	1.00385e+06	50087.5	20.0074	19.9371	0.0702453	1.0289e+06	0.805054	Q61599
VIME	3887300	2405900	3980950	5674600	6683950	10743650	2746700	3748150	5158650	6301050	9340800	4957000	21	21	5562725	5.37539e+06	187333	22.4074	22.3579	0.0494219	5.46906e+06	0.806805	P20152
DNJC3	7112600	4820500	3632850	3352550	3034500	1784250	9523550	1477500	4171900	2028850	2263450	3419500	20.6	20.6	3.95621e+06	3814125	142083	21.9157	21.8629	0.0527663	3.88517e+06	0.806805	Q91YW3
S10AE	1094300	1247150	2750100	1259450	2682300	0	892350	3372800	3381050	0	0	1751450	33.7	33.7	1505550	1566275	-60725	20.5219	20.5789	-0.0570469	1.53591e+06	0.812232	Q9D2Q8
STXB1	0	0	244875	762050	993235	1497850	0	253285	936610	894455	491450	823195	5.9	5.9	583002	566499	16502.5	19.1531	19.1117	0.0414261	574750	0.81371	O08599
TERA	932900	1048450	1607950	0	0	0	0	1326700	0	1713650	757400	0	11.4	11.4	598217	632958	-34741.7	19.1903	19.2718	-0.0814423	615588	0.815809	Q01853
ACADM	0	380425	0	0	0	0	0	436110	0	0	0	0	6.4	6.4	63404.2	72685	-9280.83	15.9523	16.1494	-0.197077	68044.6	0.816647	P45952
LGALS7	0	0	396170	0	0	0	0	349655	0	0	0	0	18.4	18.4	66028.3	58275.8	7752.5	16.0108	15.8306	0.180185	62152.1	0.816788	Q9CRB1
HMGB1	1878250	1095600	2166100	1903400	2279300	2467600	939650	1445800	1621350	1892000	3809300	1666700	13.5	13.5	1.96504e+06	1895800	69241.7	20.9061	20.8544	0.0517531	1.93042e+06	0.81956	P63158
ATPB	17607500	15200000	19152500	18725500	25464000	24311500	10214700	20860000	27282000	15488500	32414000	17343000	52.4	52.4	2.00768e+07	2.06004e+07	-523533	24.259	24.2962	-0.0371383	20338600	0.821535	P56480
CYB5A	0	1446650	0	0	0	0	0	1360300	0	0	0	0	34.7	34.7	241108	226717	14391.7	17.8793	17.7905	0.0887907	233912	0.823676	G5E850
CNDP2	0	374580	757460	0	711260	347680	0	978550	0	963585	0	0	6.7	6.7	365163	323689	41474.2	18.4782	18.3043	0.173932	344426	0.826423	Q9D1A2
BASP1	1254600	616340	1197350	1951800	1867500	1958850	398045	976775	1791600	1802250	2461200	1761850	36.3	36.3	1.47441e+06	1.53195e+06	-57546.7	20.4917	20.5469	-0.0552378	1503180	0.830224	Q91XV3
RS8	0	0	510500	535700	1044100	0	0	1033200	873980	0	0	293465	11.5	11.5	348383	366774	-18390.8	18.4103	18.4845	-0.0742162	357579	0.834996	P62242
MYL6	5313100	6535400	5043700	3474150	5782850	3992900	2646350	7608200	4762500	8395550	4267450	3269350	43	43	5.02368e+06	5.15823e+06	-134550	22.2603	22.2984	-0.0381315	5.09096e+06	0.840448	Q60605
SCEL	2028550	2001000	2302150	671650	1935550	0	0	4597300	2030950	0	1360350	1175460	12.4	12.4	1.48982e+06	1.52734e+06	-37526.7	20.5067	20.5426	-0.0358896	1508580	0.841934	Q9EQG3
CB054	0	0	851355	0	0	0	0	659450	321510	0	0	0	5.1	5.1	141892	163493	-21600.8	17.1144	17.3189	-0.204432	152693	0.84571	Q8CEZ4
ACLY	0	144335	0	0	0	0	0	122125	0	0	0	0	2.8	2.8	24055.8	20354.2	3701.67	14.5542	14.3131	0.241052	22205	0.846407	Q91V92
CALM4	1280350	0	1316250	929575	868845	618050	469930	1008750	945480	1123300	1133455	562850	16.2	16.2	835512	873961	-38449.2	19.6723	19.7372	-0.0649086	854736	0.853485	Q9JM83
SPTN1	4520800	3499400	5090300	3730550	4949900	4426450	1782300	5475400	4394700	3885650	6216950	3991400	11.5	11.5	4.36957e+06	4.29107e+06	78500	22.0591	22.0329	0.0261539	4.33032e+06	0.85361	P16546
TPM3	3429650	3983850	3882550	4631350	4627450	4599400	2628200	4578650	3475900	7300250	4575400	3137250	33.9	24.2	4192375	4.28261e+06	-90233.3	21.9993	22.0301	-0.030722	4.23749e+06	0.856946	E9Q7Q3
ADSV	0	2080150	2490200	0	632850	0	0	2645500	0	2181500	0	512600	14.4	14.4	867200	889933	-22733.3	19.726	19.7633	-0.0373325	878567	0.864266	Q60604
ROA1	1986150	1563450	1314410	906100	1742750	2036900	0	1057650	1749400	1327050	4023200	1512650	21.9	21.9	1.59163e+06	1.61166e+06	-20031.7	20.6021	20.6201	-0.0180439	1.60164e+06	0.869378	P49312
ADH7	0	2984700	2267100	0	2275600	0	0	3076250	1516450	1557800	0	1332250	21.9	21.9	1.25457e+06	1247125	7441.67	20.2588	20.2502	0.00858306	1.25085e+06	0.870224	Q64437
HS90B	17419500	13948500	15336000	18623500	22654000	22757500	9736950	16956500	15097000	24633500	31125000	14557000	24.2	24.2	18456500	18684325	-227825	24.1376	24.1553	-0.0176995	1.85704e+07	0.870357	P11499
ATPA	10622000	7652300	10490150	11410500	12786500	14597000	6883500	10595000	12690500	9764350	17834500	10661000	27.7	27.7	1.12597e+07	1.14048e+07	-145067	23.4247	23.4431	-0.0184685	11332275	0.872423	Q03265
BLMH	0	0	434775	693900	427080	2170250	0	355245	0	1081800	1253600	1121300	7.9	7.9	621001	635324	-14323.3	19.2442	19.2771	-0.0328976	628162	0.872813	Q8R016
GNAO	0	0	0	616050	0	628950	0	667800	0	616800	0	0	11.6	11.6	207500	214100	-6600	17.6628	17.7079	-0.0451732	210800	0.874058	P18872
FETUA	6977550	3677150	6746450	11153500	11442500	19792500	6170750	8780050	9457150	14458000	10349250	10122300	18.4	18.4	9.96494e+06	9.88958e+06	75358.3	23.2484	23.2375	0.0109516	9.92726e+06	0.879917	P12763
HBBT1_HBB-BS	0	0	3757950	0	0	0	0	0	0	0	3832100	0	76.2	17	626325	638683	-12358.3	19.2566	19.2847	-0.0281893	632504	0.880382	A8DUK4_E9Q223
NPM1	899650	685450	1503200	1942350	1624350	2430400	850200	844050	1949350	680650	2629500	2054000	12.5	12.5	1.51423e+06	1.50129e+06	12941.7	20.5302	20.5178	0.0123832	1.50776e+06	0.88483	Q9DAY9
YBX1	0	109145	246640	260575	606145	0	0	0	266920	217115	691200	0	23.4	23.4	203751	195872	7878.33	17.6365	17.5796	0.0568908	199812	0.886008	A2BGG7
1433Z	15908000	19751000	14900000	12789000	14882000	13765500	6997250	15616000	9766200	33503000	16569000	9107450	50.6	46.5	1.53326e+07	1.52598e+07	72766.7	23.8701	23.8632	0.00686316	15296200	0.887734	P63101
AT1A1	409480	0	0	380270	360665	452910	0	332465	320030	869780	0	0	13.7	3.6	267221	253712	13508.3	18.0277	17.9528	0.0748376	260467	0.897602	Q8VDN2
HSP7C	13794500	9320100	11091000	16711000	19408000	20410000	7444850	12233500	13402000	18075500	25280500	14259500	32.7	25.2	1.51224e+07	15115975	6458.33	23.8502	23.8496	0.000616263	1.51192e+07	0.903759	P63017
LMNA	3017200	2045400	4238550	3003500	4236150	3338100	1676600	4454050	4776200	2516350	3592600	2952700	23	23	3313150	3.32808e+06	-14933.3	21.6598	21.6663	-0.00648803	3.32062e+06	0.90434	P48678
ACTS	15355000	14529500	14146500	16603000	21772000	11980500	11778500	15996000	18513000	19102000	16915000	12268500	42.4	20.7	1.57311e+07	1.57622e+07	-31083.3	23.9071	23.91	-0.00284783	15746625	0.908896	P68134
PROF1	3355150	6732900	4053150	2707500	4300000	3388200	2518200	7150750	2899800	5009050	4046100	2931050	65.7	65.7	4.08948e+06	4.09249e+06	-3008.33	21.9635	21.9645	-0.00106089	4.09099e+06	0.913477	P62962

## Sheet: OBP_peptides LCMS
N: R Count	N: K Count	N: Length	N: Mass	N: PEP	N: Score	N: Intensity	N: MS/MS Count	T: Sequence	T: Proteins	T: Gene names	T: Protein names	M: Protein group IDs
1	0	15	1770.81	1.4768e-149	207.55	3142300000	225	ATSENLVFYDENVDR	tr|A2BHD2|A2BHD2_MOUSE;mus_OBP8;tr|A2AEP0|A2AEP0_MOUSE;musD_OBP7*;mus_OBP7(OBP1b);musM_OBP7*		OBP7/OBP8	82;88
2	0	18	2084.98	7.1436e-11	123.76	334660000	15	ATSENLVFYDENVDRASR	tr|A2BHD2|A2BHD2_MOUSE;mus_OBP8;tr|A2AEP0|A2AEP0_MOUSE;musD_OBP7*;mus_OBP7(OBP1b);musM_OBP7*			82;88
0	1	16	1966.7	6.9725e-63	243.99	3601200000	125	AYFEHMECNDDCGTLK	tr|Q9D3N5|Q9D3N5_MOUSE;mus_OBP2;tr|B1AVU4|B1AVU4_MOUSE;mus_OBP1;musM_OBP1*		OBP2	85;80
0	2	18	2193.87	0.0095601	67.685	36350000	3	AYFEHMECNDDCGTLKVK	tr|Q9D3N5|Q9D3N5_MOUSE;mus_OBP2;musM_OBP1*			85;80
0	1	10	1146.52	3.9384e-51	191.33	128610000	48	CQTHTVVGEK	tr|Q9D3N5|Q9D3N5_MOUSE;mus_OBP2;tr|B1AVU4|B1AVU4_MOUSE;mus_OBP1;musD_OBP1*;musM_OBP1*			85;80
1	1	15	1731.77	3.3912e-12	198.38	84318000	23	CQTHTVVGEKQEDGR	tr|Q9D3N5|Q9D3N5_MOUSE;mus_OBP2;tr|B1AVU4|B1AVU4_MOUSE;mus_OBP1;musD_OBP1*;musM_OBP1*			85;80
0	1	26	2772.37	2.2816e-192	246.53	3205300000	612	DGALFFHNVNVDESGQETNVILVAGK	musM_OBP1*		OBP1	85
0	2	32	3387.69	0.0009355	51.096	7887300	8	DGALFFHNVNVDESGQETNVILVAGKGETLSK	musM_OBP1*			85
0	1	13	1481.6	4.2665e-05	131.79	23641000	13	DSGENPEAMEEFK	sp|Q8K1H9|OBP2A_MOUSE;mus_LCN13			70
0	1	27	2901.41	4.3078e-176	243.91	44822000	36	EDGALFFHNVNVDESGQETNVILVAGK	tr|Q9D3N5|Q9D3N5_MOUSE;mus_OBP2;tr|B1AVU4|B1AVU4_MOUSE;mus_OBP1;musD_OBP1*		?	80
0	1	10	1216.42	1.7788e-12	182.39	4894500000	96	EITCDEGCQK	tr|A2BHD2|A2BHD2_MOUSE;mus_OBP8;tr|A2AEP0|A2AEP0_MOUSE;musD_OBP7*;mus_OBP7(OBP1b);musM_OBP7*			82;88
0	2	12	1475.56	0.00086399	151.98	263350000	9	EITCDEGCQKMK	tr|A2BHD2|A2BHD2_MOUSE;mus_OBP8;tr|A2AEP0|A2AEP0_MOUSE;musD_OBP7*;mus_OBP7(OBP1b);musM_OBP7*			82;88
0	2	10	1192.6	0.0094097	150.51	1078100000	4	EKFAELAEEK	musM_OBP5*;tr|Q9D3H2|Q9D3H2_MOUSE;musD_OBP5*;mus_OBP5(OBP1a)			86;81
0	3	15	1658.89	1.0631e-07	141.34	7533600	1	EKFAELAEEKGIPAK	musM_OBP5*			86
0	0	10	1188.44	0.001575	135.71	14084000000	117	ELAHEDTCPE	tr|A2BHD2|A2BHD2_MOUSE;mus_OBP8;tr|A2AEP0|A2AEP0_MOUSE;musD_OBP7*;mus_OBP7(OBP1b);musM_OBP7*			82;88
0	0	14	1628.69	6.5263e-175	247.11	307870000	79	ENIQHLAPTDTCNQ	tr|Q9D3N5|Q9D3N5_MOUSE;mus_OBP2;tr|B1AVU4|B1AVU4_MOUSE;mus_OBP1;musD_OBP1*;musM_OBP1*			85;80
1	1	10	1187.65	0.0094287	126.03	23818000	1	ERLTELATQK	tr|A2BHD2|A2BHD2_MOUSE;mus_OBP8;tr|A2AEP0|A2AEP0_MOUSE;musD_OBP7*;mus_OBP7(OBP1b);musM_OBP7*			82;88
1	0	15	1810.84	4.2019e-12	163.62	755050000	20	ETPENLVFYSENVDR	musM_OBP6*;tr|A2AEN9|A2AEN9_MOUSE;musD_OBP6*;mus_OBP6			87
0	0	10	1226.52	0.00072745	138.98	22558000000	26	EVLITDYCPE	musM_OBP5*;tr|Q9D3H2|Q9D3H2_MOUSE;musD_OBP5*;mus_OBP5(OBP1a)			86;81
0	1	20	2373.07	6.5687e-27	137.32	96118000	8	EYNIPKENIQHLAPTDTCNQ	tr|Q9D3N5|Q9D3N5_MOUSE;mus_OBP2;tr|B1AVU4|B1AVU4_MOUSE;mus_OBP1;musD_OBP1*;musM_OBP1*			85;80
0	1	8	935.46	3.6152e-11	176.09	0	69	FAELAEEK	musM_OBP5*;tr|Q9D3H2|Q9D3H2_MOUSE;musD_OBP5*;mus_OBP5(OBP1a)			86;81
0	2	13	1401.75	2.2097e-20	224.43	814650000	25	FAELAEEKGIPAK	musM_OBP5*			86
0	1	9	1011.5	0.0046256	187.22	12905000	7	GEALTHEQK	tr|A2BHD2|A2BHD2_MOUSE;mus_OBP8;tr|A2AEP0|A2AEP0_MOUSE;musD_OBP7*;mus_OBP7(OBP1b);musM_OBP7*			82;88
1	2	19	2181.14	3.2518e-11	124.2	26478000	7	GEALTHEQKERLTELATQK	tr|A2BHD2|A2BHD2_MOUSE;mus_OBP8;tr|A2AEP0|A2AEP0_MOUSE;musD_OBP7*;mus_OBP7(OBP1b);musM_OBP7*			82;88
0	3	14	1515.83	0.0031858	102.9	1133500	1	GETLSKAQKQELGK	tr|Q9D3N5|Q9D3N5_MOUSE;mus_OBP2;tr|B1AVU4|B1AVU4_MOUSE;mus_OBP1;musD_OBP1*;musM_OBP1*			85;80
0	1	18	1938.88	0.021473	62.469	617250000	1	GIPAGNLKELAHEDTCPE	tr|A2BHD2|A2BHD2_MOUSE;mus_OBP8;musM_OBP7*			82;88
0	0	10	1116.46	0.014356	87.639	12374000	3	HVLGTDTCPE	musM_OBP6*;tr|A2AEN9|A2AEN9_MOUSE;musD_OBP6*;mus_OBP6			87
1	0	12	1359.74	2.4927e-22	229.68	25817000000	399	IETSGPLELFVR	tr|A2BHD2|A2BHD2_MOUSE;mus_OBP8;tr|A2AEP0|A2AEP0_MOUSE;musD_OBP7*;mus_OBP7(OBP1b);musM_OBP7*			82;88
1	0	9	1026.62	0.017243	97.431	36988000	1	IPSIVFPVR	sp|Q8K1H9|OBP2A_MOUSE;mus_LCN13			70
0	2	27	2900.47	2.8243e-194	231.51	1917800000	190	KDGALFFHNVNVDESGQETNVILVAGK	musM_OBP1*			85
0	3	28	3028.56	7.5686e-116	226.24	680280000	78	KKDGALFFHNVNVDESGQETNVILVAGK	musM_OBP1*			85
0	3	18	2009.17	0.0096197	65.287	125280000	7	KTKLLFILGHGPLTSEQK	musM_OBP5*;tr|Q9D3H2|Q9D3H2_MOUSE;musD_OBP5*;mus_OBP5(OBP1a)			86;81
0	1	12	1390.68	0.0050032	89.663	15785000	8	LENMFVPEIGDK	sp|Q8K1H9|OBP2A_MOUSE;mus_LCN13			70
1	1	17	1958.05	1.1725e-13	142.54	556110000	15	LIFVLGNKPLTSEENER	musM_OBP6*;tr|A2AEN9|A2AEN9_MOUSE;musD_OBP6*;mus_OBP6			87
0	1	15	1651.93	0	365.6	23623000000	697	LLFILGHGPLTSEQK	musM_OBP5*;tr|Q9D3H2|Q9D3H2_MOUSE;musD_OBP5*;mus_OBP5(OBP1a)			86;81
0	2	17	1909.07	2.5315e-13	139.66	717230000	17	LLFILGHGPLTSEQKEK	musM_OBP5*;tr|Q9D3H2|Q9D3H2_MOUSE;musD_OBP5*;mus_OBP5(OBP1a)			86;81
0	3	25	2826.52	2.7178e-08	79.341	61913000	9	LLFILGHGPLTSEQKEKFAELAEEK	musM_OBP5*;tr|Q9D3H2|Q9D3H2_MOUSE;musD_OBP5*;mus_OBP5(OBP1a)			86;81
1	1	18	2125.07	7.2898e-25	180.93	647020000	22	LLKATSENLVFYDENVDR	tr|A2BHD2|A2BHD2_MOUSE;mus_OBP8;tr|A2AEP0|A2AEP0_MOUSE;musD_OBP7*;mus_OBP7(OBP1b);musM_OBP7*			82;88
0	2	16	1812.01	2.0236e-09	136.83	1174900000	12	LLYILGKGEALTHEQK	tr|A2BHD2|A2BHD2_MOUSE;mus_OBP8;tr|A2AEP0|A2AEP0_MOUSE;musD_OBP7*;mus_OBP7(OBP1b);musM_OBP7*			82;88
1	2	18	2097.16	0.00059948	95.662	37829000	8	LLYILGKGEALTHEQKER	tr|A2BHD2|A2BHD2_MOUSE;mus_OBP8;tr|A2AEP0|A2AEP0_MOUSE;musD_OBP7*;mus_OBP7(OBP1b);musM_OBP7*			82;88
0	1	8	902.507	0.0017355	150.05	0	53	LTELATQK	tr|A2BHD2|A2BHD2_MOUSE;mus_OBP8;tr|A2AEP0|A2AEP0_MOUSE;musD_OBP7*;mus_OBP7(OBP1b);musM_OBP7*			82;88
0	2	16	1652.95	2.234e-47	233.52	1615800000	17	LTELATQKGIPAGNLK	tr|A2BHD2|A2BHD2_MOUSE;mus_OBP8;musM_OBP7*			82;88
1	0	18	2138.02	1.4467e-149	222.09	13521000000	505	LVDESPENLIFYSENVDR	musM_OBP5*			86
2	0	21	2480.18	1.7469e-16	123.14	271730000	29	LVDESPENLIFYSENVDRADR	musM_OBP5*			86
2	1	22	2608.28	0.00022515	74.812	63872000	5	LVDESPENLIFYSENVDRADRK	musM_OBP5*			86
1	0	18	2125.98	2.7753e-94	174.59	29813000	19	LVDESPENLTFYSENVDR	tr|Q9D3H2|Q9D3H2_MOUSE;musD_OBP5*;mus_OBP5(OBP1a)			81
0	2	9	1102.64	0.01302	137.95	30834000	4	LVKEYNIPK	tr|Q9D3N5|Q9D3N5_MOUSE;mus_OBP2;tr|B1AVU4|B1AVU4_MOUSE;mus_OBP1;musD_OBP1*;musM_OBP1*			85;80
0	1	10	1257.53	0.00015785	135.86	95474000	29	NQYEGENNYK	tr|A2BHD2|A2BHD2_MOUSE;mus_OBP8;tr|A2AEP0|A2AEP0_MOUSE;musD_OBP7*;mus_OBP7(OBP1b);musM_OBP7*			82;88
0	2	13	1611.79	6.179e-05	179.59	581840000	20	NQYEGENNYKLLK	tr|A2BHD2|A2BHD2_MOUSE;mus_OBP8;tr|A2AEP0|A2AEP0_MOUSE;musD_OBP7*;mus_OBP7(OBP1b);musM_OBP7*			82;88
0	1	14	1544.7	2.2206e-05	141.59	79116000	15	QNGQCSLTTVTGYK	tr|A2BHD2|A2BHD2_MOUSE;mus_OBP8;tr|A2AEP0|A2AEP0_MOUSE;musD_OBP7*;mus_OBP7(OBP1b)			82
0	2	9	1131.44	0.01301	131.62	11358000	2	SLTCEKECK	musM_OBP6*;tr|A2AEN9|A2AEN9_MOUSE;musD_OBP6*;mus_OBP6;musM_OBP5*;tr|Q9D3H2|Q9D3H2_MOUSE;musD_OBP5*;mus_OBP5(OBP1a)			86;81;87
0	2	13	1633.74	1.1948e-234	258.23	341290000	40	TFKNQYEGENNYK	tr|A2BHD2|A2BHD2_MOUSE;mus_OBP8;tr|A2AEP0|A2AEP0_MOUSE;musD_OBP7*;mus_OBP7(OBP1b);musM_OBP7*			82;88
0	2	11	1313.65	3.8392e-11	188.27	17000000000	43	TFYIAADKEEK	musM_OBP1*			85
0	3	13	1540.81	0.0092046	120.55	63666000	5	TFYIAADKEEKVK	musM_OBP1*/OBP2			85
0	2	17	1881.07	3.2413e-18	166.9	994660000	23	TKLLFILGHGPLTSEQK	musM_OBP5*;tr|Q9D3H2|Q9D3H2_MOUSE;musD_OBP5*;mus_OBP5(OBP1a)			86;81
0	3	19	2138.21	0.010097	63.443	14846000	3	TKLLFILGHGPLTSEQKEK	musM_OBP5*;tr|Q9D3H2|Q9D3H2_MOUSE;musD_OBP5*;mus_OBP5(OBP1a)			86;81
0	3	18	2041.16	0.013503	59.579	10536000	1	TKLLYILGKGEALTHEQK	tr|A2BHD2|A2BHD2_MOUSE;mus_OBP8;tr|A2AEP0|A2AEP0_MOUSE;musD_OBP7*;mus_OBP7(OBP1b);musM_OBP7*			82;88
1	0	8	963.452	0.026355	89.55	0	1	TQFQGNNR	musM_OBP5*;tr|Q9D3H2|Q9D3H2_MOUSE;musD_OBP5*;mus_OBP5(OBP1a)			86;81
2	1	28	3374.62	0.013406	38.484	3019600	1	TQFQGNNRYKLVDESPENLIFYSENVDR	musM_OBP5*			86
0	1	13	1593.74	0.00069009	99.669	659380000	10	TQYQGDNHYELVK	musM_OBP6*;tr|A2AEN9|A2AEN9_MOUSE;musD_OBP6*;mus_OBP6			87
1	0	14	1762.74	0.0015941	80.632	7574600	2	TSVNEHYIFYCEGR	sp|Q8K1H9|OBP2A_MOUSE;mus_LCN13			70
0	1	11	1191.58	2.1063e-14	218.55	10965000000	152	TTAIMADNIDK	tr|A2BHD2|A2BHD2_MOUSE;mus_OBP8;tr|A2AEP0|A2AEP0_MOUSE;musD_OBP7*;mus_OBP7(OBP1b);musM_OBP7*			82;88
1	1	23	2533.31	0	295.03	14034000000	879	TTAIMADNIDKIETSGPLELFVR	tr|A2BHD2|A2BHD2_MOUSE;mus_OBP8;tr|A2AEP0|A2AEP0_MOUSE;musD_OBP7*;mus_OBP7(OBP1b);musM_OBP7*			82;88
1	0	8	815.45	0.0074498	99.136	0	6	TVAIAADR	musM_OBP6*;tr|A2AEN9|A2AEN9_MOUSE;musD_OBP6*;mus_OBP6;musM_OBP5*;tr|Q9D3H2|Q9D3H2_MOUSE;musD_OBP5*;mus_OBP5(OBP1a)			86;81;87
1	1	11	1157.64	0.0091067	147.58	86611000	6	TVAIAADRVDK	musM_OBP6*;tr|A2AEN9|A2AEN9_MOUSE;musD_OBP6*;mus_OBP6;musM_OBP5*;tr|Q9D3H2|Q9D3H2_MOUSE;musD_OBP5*;mus_OBP5(OBP1a)			86;81;87
2	1	14	1555.87	0.017824	83.182	160980000	2	TVAIAADRVDKIER	musM_OBP6*;tr|A2AEN9|A2AEN9_MOUSE;musD_OBP6*;mus_OBP6;musM_OBP5*;tr|Q9D3H2|Q9D3H2_MOUSE;musD_OBP5*;mus_OBP5(OBP1a)			86;81;87
1	1	11	1355.66	0.011794	105.17	105130000	9	TYKTQFQGNNR	musM_OBP5*;tr|Q9D3H2|Q9D3H2_MOUSE;musD_OBP5*;mus_OBP5(OBP1a)			86;81
1	2	13	1646.82	0.014421	90.913	989320	1	TYKTQFQGNNRYK	musM_OBP5*;tr|Q9D3H2|Q9D3H2_MOUSE;musD_OBP5*;mus_OBP5(OBP1a)			86;81
2	1	11	1270.7	0.018231	93.839	2498600	0	VDKIERGGELR	musM_OBP6*;musM_OBP5*;tr|Q9D3H2|Q9D3H2_MOUSE;musD_OBP5*;mus_OBP5(OBP1a)			86;81;87
0	1	25	2825.29	1.7459e-71	133.41	449170000	39	VTFYVNENGQCSLTTITGYLQEDGK	musM_OBP5*;tr|Q9D3H2|Q9D3H2_MOUSE;musD_OBP5*;mus_OBP5(OBP1a)			86;81
0	1	20	2268.06	8.5756e-77	171.79	241830000	49	VTFYVNQNGQCSLTTVTGYK	musM_OBP7*			88
1	0	13	1481.76	0.0021677	103.11	30414000	8	YAVSSHIPPENIR	musM_OBP6*;tr|A2AEN9|A2AEN9_MOUSE;musD_OBP6*;mus_OBP6			87
1	1	20	2429.18	7.7645e-32	145.88	215250000	16	YKLVDESPENLIFYSENVDR	musM_OBP5*			86
1	0	8	961.414	0.028669	93.143	0	1	YTTDYSGR	tr|Q9D3N5|Q9D3N5_MOUSE;mus_OBP2;tr|B1AVU4|B1AVU4_MOUSE;mus_OBP1;musD_OBP1*;musM_OBP1*			85;80
2	0	15	1868.87	2.9065e-06	129.37	128070000	10	YTTDYSGRNYFEVVR	musM_OBP1*			85

## Sheet: MUP_peptides LCMS
N: R Count	N: K Count	N: Length	N: Mass	N: PEP	N: Score	N: Intensity	N: MS/MS Count	T: Sequence	T: Proteins	T: Gene names	T: Protein names	M: Protein group IDs
0	1	18	2054.97	1.4038e-13	129.36	355150000	13	AGEYSVMYDGFNTFTILK	sp|P11590|MUP4_MOUSE;mus_MUP4			77
0	1	18	2024.97	0.0075917	74.793	47241000	2	AGEYSVTYDGFNTFTILK	tr|B5TE77|B5TE77_MOUSE;sp|P11591|MUP5_MOUSE;mus_MUP5			78
0	1	18	2008.94	3.2857e-16	133.52	995960000	12	AGEYSVTYDGFNTFTIPK	sp|B5X0G2|MUP17_MOUSE;mus_MUP17;tr|A2BIN0|A2BIN0_MOUSE;sp|P04938|MUP8_MOUSE;tr|A2AKN9|A2AKN9_MOUSE;sp|P02762|MUP6_MOUSE;mus_MUP9;mus_MUP2;mus_MUP19;mus_MUP16;tr|A2BIM8|A2BIM8_MOUSE;mus_MUP18;mus_MUP11;tr|A9R9W0|A9R9W0_MOUSE;tr|A2CEL1|A2CEL1_MOUSE;sp|P11588|MUP1_MOUSE;mus_MUP15;mus_MUP12;mus_MUP1;tr|A9C497|A9C497_MOUSE;tr|A9C496|A9C496_MOUSE;tr|A2CEL0|A2CEL0_MOUSE;tr|L7MUC7|L7MUC7_MOUSE;sp|P11589|…			72;209;71;73;79;74;665
0	1	13	1500.58	7.2472e-05	145.6	819420000	67	DEECSELSMVADK	sp|B5X0G2|MUP17_MOUSE;mus_MUP17;tr|A2CEK6|A2CEK6_MOUSE;mus_MUP13;tr|L7N222|L7N222_MOUSE;sp|P04938|MUP8_MOUSE;tr|A2AKN9|A2AKN9_MOUSE;sp|P02762|MUP6_MOUSE;mus_MUP9;mus_MUP2;mus_MUP19;mus_MUP16;tr|A2BIM8|A2BIM8_MOUSE;mus_MUP18;mus_MUP11;tr|A9R9W0|A9R9W0_MOUSE;tr|A2CEL1|A2CEL1_MOUSE;sp|P11588|MUP1_MOUSE;mus_MUP15;mus_MUP12;mus_MUP1;tr|A9C497|A9C497_MOUSE;tr|A9C496|A9C496_MOUSE;tr|A2CEL0|A2CEL0_MOUSE;…			72;209;71;73;79;74
0	2	16	1858.76	8.5517e-05	101.42	32682000	8	DEECSELSMVADKTEK	sp|B5X0G2|MUP17_MOUSE;mus_MUP17;tr|A2CEK6|A2CEK6_MOUSE;mus_MUP13;tr|L7N222|L7N222_MOUSE;sp|P04938|MUP8_MOUSE;tr|A2AKN9|A2AKN9_MOUSE;sp|P02762|MUP6_MOUSE;mus_MUP9;mus_MUP2;mus_MUP19;mus_MUP16;tr|A2BIM8|A2BIM8_MOUSE;mus_MUP18;mus_MUP11;tr|A9R9W0|A9R9W0_MOUSE;tr|A2CEL1|A2CEL1_MOUSE;sp|P11588|MUP1_MOUSE;mus_MUP15;mus_MUP12;mus_MUP1;tr|A9C497|A9C497_MOUSE;tr|A9C496|A9C496_MOUSE;tr|A2CEL0|A2CEL0_MOUSE;…			72;209;71;73;79;74
1	0	13	1626.73	0.0015674	119.39	34976000	5	DEENFQLMELFGR	tr|B5TE77|B5TE77_MOUSE;sp|P11591|MUP5_MOUSE;mus_MUP5			78
1	1	22	2611.21	3.944e-16	101.92	4662800	3	DEENFQLMELFGREPDLSSDIK	tr|B5TE77|B5TE77_MOUSE;sp|P11591|MUP5_MOUSE;mus_MUP5			78
1	0	13	1557.71	0.0088017	70.438	6642600	1	DGETFQLMELYGR	sp|Q5FW60|MUP20_MOUSE;mus_MUP20/Darcin			75
1	0	13	1485.69	8.4235e-06	176.87	3774500000	66	DGETFQLMGLYGR	sp|B5X0G2|MUP17_MOUSE;mus_MUP17;tr|A2CEK6|A2CEK6_MOUSE;mus_MUP13;tr|L7N222|L7N222_MOUSE;tr|A2BIN0|A2BIN0_MOUSE;sp|P04938|MUP8_MOUSE;tr|A2AKN9|A2AKN9_MOUSE;sp|P02762|MUP6_MOUSE;mus_MUP9;mus_MUP2;mus_MUP19;mus_MUP16;tr|A2BIM8|A2BIM8_MOUSE;mus_MUP18;mus_MUP11;tr|A9R9W0|A9R9W0_MOUSE;tr|A2CEL1|A2CEL1_MOUSE;sp|P11588|MUP1_MOUSE;mus_MUP15;mus_MUP12;mus_MUP1;tr|A9C497|A9C497_MOUSE;tr|A9C496|A9C496_MOUSE;…			72;209;71;73;79;74;665
1	1	22	2470.17	3.0698e-17	111.01	29660000	15	DGETFQLMGLYGREPDLSSDIK	sp|B5X0G2|MUP17_MOUSE;mus_MUP17;tr|A2CEK6|A2CEK6_MOUSE;mus_MUP13;tr|L7N222|L7N222_MOUSE;tr|A2BIN0|A2BIN0_MOUSE;sp|P04938|MUP8_MOUSE;tr|A2AKN9|A2AKN9_MOUSE;sp|P02762|MUP6_MOUSE;mus_MUP9;mus_MUP2;mus_MUP19;mus_MUP16;tr|A2BIM8|A2BIM8_MOUSE;mus_MUP18;mus_MUP11;tr|A9R9W0|A9R9W0_MOUSE;tr|A2CEL1|A2CEL1_MOUSE;sp|P11588|MUP1_MOUSE;mus_MUP15;mus_MUP12;mus_MUP1;tr|A9C497|A9C497_MOUSE;tr|A9C496|A9C496_MOUSE;…			72;209;71;73;79;74;665
1	1	10	1220.58	0.0079711	132.88	149540000	5	EKIEDNGNFR	sp|P04938|MUP8_MOUSE;tr|A2AKN9|A2AKN9_MOUSE;sp|P02762|MUP6_MOUSE;mus_MUP9;mus_MUP2;mus_MUP19;mus_MUP16;tr|A2BIM8|A2BIM8_MOUSE;mus_MUP18;mus_MUP11;tr|A9R9W0|A9R9W0_MOUSE;tr|A2CEL1|A2CEL1_MOUSE;sp|P11588|MUP1_MOUSE;mus_MUP15;mus_MUP12;mus_MUP1;tr|A9C497|A9C497_MOUSE;tr|A9C496|A9C496_MOUSE;tr|A2CEL0|A2CEL0_MOUSE;tr|L7MUC7|L7MUC7_MOUSE;sp|P11589|MUP2_MOUSE;mus_MUP10;tr|A2BIN1|A2BIN1_MOUSE;tr|B8JI96|B…			72;209;71;73;79;665
1	1	10	1257.61	0.0016701	132.32	1325700000	17	EKIEEHGNFR	sp|B5X0G2|MUP17_MOUSE;mus_MUP17;tr|A2CEK6|A2CEK6_MOUSE;mus_MUP13;tr|L7N222|L7N222_MOUSE			74
1	1	10	1228.59	0.029858	72.607	10667000	1	EKIEEHGTMR	tr|B5TE77|B5TE77_MOUSE;sp|P11591|MUP5_MOUSE;mus_MUP5			78
1	0	11	1257.63	0.00015536	201.09	2327200000	19	ENIIDLSNANR	sp|B5X0G2|MUP17_MOUSE;mus_MUP17;tr|A2CEK6|A2CEK6_MOUSE;mus_MUP13;tr|A2BIN0|A2BIN0_MOUSE;tr|A2CEK9|A2CEK9_MOUSE;sp|P04938|MUP8_MOUSE;tr|A2AKN9|A2AKN9_MOUSE;sp|P02762|MUP6_MOUSE;mus_MUP9;mus_MUP2;mus_MUP19;mus_MUP16;tr|A2BIM8|A2BIM8_MOUSE;mus_MUP18;mus_MUP11;tr|A9R9W0|A9R9W0_MOUSE;tr|A2CEL1|A2CEL1_MOUSE;sp|P11588|MUP1_MOUSE;mus_MUP15;mus_MUP12;mus_MUP1;sp|P11589|MUP2_MOUSE;mus_MUP10;tr|A2BIN1|A2BIN…			72;209;71;73;79;74;665;78
1	0	11	1271.65	0.0070565	139.86	25652000	12	ENIIDLTNANR	sp|Q5FW60|MUP20_MOUSE;mus_MUP20/Darcin			75
1	0	11	1299.68	0.0024116	121.02	38808000	14	ENIIDLTNVNR	tr|Q3KQQ2|Q3KQQ2_MOUSE;sp|P04939|MUP3_MOUSE;mus_MUP3			76
0	1	9	1002.49	0.012745	107.21	1382200000	13	EPDLSSDIK	sp|B5X0G2|MUP17_MOUSE;mus_MUP17;tr|A2CEK6|A2CEK6_MOUSE;mus_MUP13;tr|L7N222|L7N222_MOUSE;tr|A2BIN0|A2BIN0_MOUSE;sp|P04938|MUP8_MOUSE;tr|A2AKN9|A2AKN9_MOUSE;sp|P02762|MUP6_MOUSE;mus_MUP9;mus_MUP2;mus_MUP19;mus_MUP16;tr|A2BIM8|A2BIM8_MOUSE;mus_MUP18;mus_MUP11;tr|A9R9W0|A9R9W0_MOUSE;tr|A2CEL1|A2CEL1_MOUSE;sp|P11588|MUP1_MOUSE;mus_MUP15;mus_MUP12;mus_MUP1;tr|A9C497|A9C497_MOUSE;tr|A9C496|A9C496_MOUSE;…			72;209;71;73;79;74;665;78;75
1	1	11	1287.63	0.012244	103.31	14469000	3	EPDLSSDIKER	sp|B5X0G2|MUP17_MOUSE;mus_MUP17;tr|A2CEK6|A2CEK6_MOUSE;mus_MUP13;tr|L7N222|L7N222_MOUSE;tr|A2BIN0|A2BIN0_MOUSE;sp|P04938|MUP8_MOUSE;tr|A2AKN9|A2AKN9_MOUSE;sp|P02762|MUP6_MOUSE;mus_MUP9;mus_MUP2;mus_MUP19;mus_MUP16;tr|A2BIM8|A2BIM8_MOUSE;mus_MUP18;mus_MUP11;tr|A9R9W0|A9R9W0_MOUSE;tr|A2CEL1|A2CEL1_MOUSE;sp|P11588|MUP1_MOUSE;mus_MUP15;mus_MUP12;mus_MUP1;tr|A9C497|A9C497_MOUSE;tr|A9C496|A9C496_MOUSE;…			72;209;71;73;79;74;665
1	0	12	1460.69	1.2658e-25	236.11	3034500000	51	FAQLCEEHGILR	sp|B5X0G2|MUP17_MOUSE;mus_MUP17;tr|A2CEK6|A2CEK6_MOUSE;mus_MUP13;tr|L7N222|L7N222_MOUSE;tr|A2BIN0|A2BIN0_MOUSE;sp|P04938|MUP8_MOUSE;tr|A2AKN9|A2AKN9_MOUSE;sp|P02762|MUP6_MOUSE;mus_MUP9;mus_MUP2;mus_MUP19;mus_MUP16;tr|A2BIM8|A2BIM8_MOUSE;mus_MUP18;mus_MUP11;tr|A9C497|A9C497_MOUSE;tr|A9C496|A9C496_MOUSE;mus_MUP10;tr|A2BIN1|A2BIN1_MOUSE;tr|B8JI96|B8JI96_MOUSE;tr|A2AKN8|A2AKN8_MOUSE;mus_MUP8;tr|E9PVW…			72;71;73;79;74;665
1	0	12	1384.71	0.0030848	88.155	25897000	11	FAQLSEEHGIVR	sp|Q5FW60|MUP20_MOUSE;mus_MUP20/Darcin			75
0	1	18	2170	9.4401e-09	117.53	53123000	10	FHTVIDEECTEIYLVADK	tr|B5TE77|B5TE77_MOUSE;sp|P11591|MUP5_MOUSE;mus_MUP5			78
0	1	18	2067.96	5.0398e-26	195.38	181070000	63	FHTVIDGECSEIFLVADK	sp|P11590|MUP4_MOUSE;mus_MUP4			77
0	2	21	2426.15	0.0038437	62.556	2979200	1	FHTVIDGECSEIFLVADKTEK	sp|P11590|MUP4_MOUSE;mus_MUP4			77
1	1	18	2140.92	1.5809e-24	160.09	1669300000	55	FHTVRDEECSELSMVADK	sp|P04938|MUP8_MOUSE;tr|A2AKN9|A2AKN9_MOUSE;sp|P02762|MUP6_MOUSE;mus_MUP9;mus_MUP2;mus_MUP19;mus_MUP16;tr|A2BIM8|A2BIM8_MOUSE;mus_MUP18;mus_MUP11;tr|A9R9W0|A9R9W0_MOUSE;tr|A2CEL1|A2CEL1_MOUSE;sp|P11588|MUP1_MOUSE;mus_MUP15;mus_MUP12;mus_MUP1;tr|A9C497|A9C497_MOUSE;tr|A9C496|A9C496_MOUSE;tr|A2CEL0|A2CEL0_MOUSE;sp|P11589|MUP2_MOUSE;mus_MUP10;tr|A2BIN1|A2BIN1_MOUSE;tr|A2CEK7|A2CEK7_MOUSE;mus_MUP14			72;209;71;73
1	2	21	2499.11	1.1028e-28	144.27	126200000	16	FHTVRDEECSELSMVADKTEK	sp|P04938|MUP8_MOUSE;tr|A2AKN9|A2AKN9_MOUSE;sp|P02762|MUP6_MOUSE;mus_MUP9;mus_MUP2;mus_MUP19;mus_MUP16;tr|A2BIM8|A2BIM8_MOUSE;mus_MUP18;mus_MUP11;tr|A9R9W0|A9R9W0_MOUSE;tr|A2CEL1|A2CEL1_MOUSE;sp|P11588|MUP1_MOUSE;mus_MUP15;mus_MUP12;mus_MUP1;tr|A9C497|A9C497_MOUSE;tr|A9C496|A9C496_MOUSE;tr|A2CEL0|A2CEL0_MOUSE;sp|P11589|MUP2_MOUSE;mus_MUP10;tr|A2BIN1|A2BIN1_MOUSE;tr|A2CEK7|A2CEK7_MOUSE;mus_MUP14			72;209;71;73
1	0	8	963.441	8.295e-17	178.08	0	2	IEDNGNFR	sp|P04938|MUP8_MOUSE;tr|A2AKN9|A2AKN9_MOUSE;sp|P02762|MUP6_MOUSE;mus_MUP9;mus_MUP2;mus_MUP19;mus_MUP16;tr|A2BIM8|A2BIM8_MOUSE;mus_MUP18;mus_MUP11;tr|A9R9W0|A9R9W0_MOUSE;tr|A2CEL1|A2CEL1_MOUSE;sp|P11588|MUP1_MOUSE;mus_MUP15;mus_MUP12;mus_MUP1;tr|A9C497|A9C497_MOUSE;tr|A9C496|A9C496_MOUSE;tr|A2CEL0|A2CEL0_MOUSE;tr|L7MUC7|L7MUC7_MOUSE;sp|P11589|MUP2_MOUSE;mus_MUP10;tr|A2BIN1|A2BIN1_MOUSE;tr|B8JI96|B…			72;209;71;73;79;665
0	1	14	1591.82	0.00049228	127.03	58809000	10	INGEWFSILLASDK	sp|P11590|MUP4_MOUSE;mus_MUP4			77
1	1	15	1747.93	0.00079851	87.083	89879000	2	INGEWFSILLASDKR	sp|P11590|MUP4_MOUSE;mus_MUP4			77
0	1	14	1595.83	1.5402e-07	169.98	317650000	13	INGEWHTIILASDK	sp|B5X0G2|MUP17_MOUSE;mus_MUP17;tr|A2CEK6|A2CEK6_MOUSE;mus_MUP13;tr|L7N222|L7N222_MOUSE;sp|P04938|MUP8_MOUSE;tr|A2AKN9|A2AKN9_MOUSE;sp|P02762|MUP6_MOUSE;mus_MUP9;mus_MUP2;mus_MUP19;mus_MUP16;tr|A2BIM8|A2BIM8_MOUSE;mus_MUP18;mus_MUP11;tr|A9R9W0|A9R9W0_MOUSE;tr|A2CEL1|A2CEL1_MOUSE;sp|P11588|MUP1_MOUSE;mus_MUP15;mus_MUP12;mus_MUP1;tr|A9C497|A9C497_MOUSE;tr|A9C496|A9C496_MOUSE;tr|A2CEL0|A2CEL0_MOUSE;…			72;209;71;73;79;74;665
1	1	15	1751.93	3.432e-12	193.45	344910000	22	INGEWHTIILASDKR	sp|B5X0G2|MUP17_MOUSE;mus_MUP17;tr|A2CEK6|A2CEK6_MOUSE;mus_MUP13;tr|L7N222|L7N222_MOUSE;sp|P04938|MUP8_MOUSE;tr|A2AKN9|A2AKN9_MOUSE;sp|P02762|MUP6_MOUSE;mus_MUP9;mus_MUP2;mus_MUP19;mus_MUP16;tr|A2BIM8|A2BIM8_MOUSE;mus_MUP18;mus_MUP11;tr|A9R9W0|A9R9W0_MOUSE;tr|A2CEL1|A2CEL1_MOUSE;sp|P11588|MUP1_MOUSE;mus_MUP15;mus_MUP12;mus_MUP1;tr|A9C497|A9C497_MOUSE;tr|A9C496|A9C496_MOUSE;tr|A2CEL0|A2CEL0_MOUSE;…			72;209;71;73;79;74;665
0	2	9	1002.53	0.000222	139.15	198760000	4	KADLNSDIK	sp|P11590|MUP4_MOUSE;mus_MUP4			77
0	3	11	1259.67	3.9159e-26	132.14	6903200	1	KADLNSDIKEK	sp|P11590|MUP4_MOUSE;mus_MUP4			77
1	1	14	1754.83	4.3184e-08	151.3	75190000	9	KDEENFQLMELFGR	tr|B5TE77|B5TE77_MOUSE;sp|P11591|MUP5_MOUSE;mus_MUP5			78
1	2	23	2739.31	1.2038e-17	112.85	8735600	1	KDEENFQLMELFGREPDLSSDIK	tr|B5TE77|B5TE77_MOUSE;sp|P11591|MUP5_MOUSE;mus_MUP5			78
0	1	9	1086.52	2.9147e-06	162.97	284380000	11	LCEEHGIIK	sp|P11590|MUP4_MOUSE;mus_MUP4			77
1	0	9	1114.53	0.00035441	109.48	5913200	7	LCEEHGILR	sp|P11589|MUP2_MOUSE			209
1	0	9	1100.51	0.0026321	177.3	99343000	12	LCEEHGIVR	tr|B5TE77|B5TE77_MOUSE;sp|P11591|MUP5_MOUSE;mus_MUP5			78
0	1	11	1367.78	0.0048537	89.171	50080000	5	LFLEQIHVLEK	sp|P11589|MUP2_MOUSE;mus_MUP10;tr|A2BIN1|A2BIN1_MOUSE			209;71
0	1	16	1894.09	2.544e-99	261.17	970760000	42	LFLEQIHVLENSLVLK	sp|B5X0G2|MUP17_MOUSE;mus_MUP17;tr|A2CEK6|A2CEK6_MOUSE;mus_MUP13;tr|L7N222|L7N222_MOUSE;sp|P04938|MUP8_MOUSE;tr|A2AKN9|A2AKN9_MOUSE;sp|P02762|MUP6_MOUSE;mus_MUP9;mus_MUP2;mus_MUP19;mus_MUP16;tr|A2BIM8|A2BIM8_MOUSE;mus_MUP18;mus_MUP11;tr|A9R9W0|A9R9W0_MOUSE;tr|A2CEL1|A2CEL1_MOUSE;sp|P11588|MUP1_MOUSE;mus_MUP15;mus_MUP12;mus_MUP1;tr|A9C497|A9C497_MOUSE;tr|A9C496|A9C496_MOUSE;tr|A2CEL0|A2CEL0_MOUSE;…			72;74
0	1	15	1822.86	4.795e-05	119.96	4621300000	38	TDYDNFLMAHLINEK	sp|B5X0G2|MUP17_MOUSE;mus_MUP17;tr|A2CEK6|A2CEK6_MOUSE;mus_MUP13;tr|L7N222|L7N222_MOUSE;tr|A2BIN0|A2BIN0_MOUSE;sp|P04938|MUP8_MOUSE;tr|A2AKN9|A2AKN9_MOUSE;sp|P02762|MUP6_MOUSE;mus_MUP9;mus_MUP2;mus_MUP19;mus_MUP16;tr|A2BIM8|A2BIM8_MOUSE;mus_MUP18;mus_MUP11;tr|A9R9W0|A9R9W0_MOUSE;tr|A2CEL1|A2CEL1_MOUSE;sp|P11588|MUP1_MOUSE;mus_MUP15;mus_MUP12;mus_MUP1;tr|A9C497|A9C497_MOUSE;tr|A9C496|A9C496_MOUSE;…			72;209;71;73;79;74;665
1	1	28	3290.54	3.0705e-07	68.309	63729000	11	TDYDNFLMAHLINEKDGETFQLMGLYGR	sp|B5X0G2|MUP17_MOUSE;mus_MUP17;tr|A2CEK6|A2CEK6_MOUSE;mus_MUP13;tr|L7N222|L7N222_MOUSE;tr|A2BIN0|A2BIN0_MOUSE;sp|P04938|MUP8_MOUSE;tr|A2AKN9|A2AKN9_MOUSE;sp|P02762|MUP6_MOUSE;mus_MUP9;mus_MUP2;mus_MUP19;mus_MUP16;tr|A2BIM8|A2BIM8_MOUSE;mus_MUP18;mus_MUP11;tr|A9R9W0|A9R9W0_MOUSE;tr|A2CEL1|A2CEL1_MOUSE;sp|P11588|MUP1_MOUSE;mus_MUP15;mus_MUP12;mus_MUP1;tr|A9C497|A9C497_MOUSE;tr|A9C496|A9C496_MOUSE;…			72;209;71;73;79;74;665
0	1	15	1914.88	1.8852e-12	157.09	2522700000	23	TDYDNYIMFHLINEK	sp|P11590|MUP4_MOUSE;mus_MUP4			77
0	1	14	1785.84	0.00066912	115.34	103200000	10	TDYDNYIMFHLINK	tr|B5TE77|B5TE77_MOUSE;sp|P11591|MUP5_MOUSE;mus_MUP5			78
0	2	15	1913.93	0.0079129	65.043	9623800	3	TDYDNYIMFHLINKK	tr|B5TE77|B5TE77_MOUSE;sp|P11591|MUP5_MOUSE;mus_MUP5			78
0	1	14	1751.86	0.0092689	58.781	8790500	1	TDYDNYIMIHLINK	tr|Q3KQQ2|Q3KQQ2_MOUSE;sp|P04939|MUP3_MOUSE;mus_MUP3;sp|Q5FW60|MUP20_MOUSE;mus_MUP20/Darcin			75;76
1	0	10	1256.62	0.0015709	140.49	924850000	46	TFQLMELYGR	sp|P11590|MUP4_MOUSE;mus_MUP4;tr|Q3KQQ2|Q3KQQ2_MOUSE;sp|P04939|MUP3_MOUSE;mus_MUP3			77;76
0	1	16	1858.98	1.7945e-13	177.04	316610000	19	VFVEHIDVLENSLAFK	tr|B5TE77|B5TE77_MOUSE;sp|P11591|MUP5_MOUSE;mus_MUP5			78
0	1	16	1881.01	3.5235e-54	181.97	2173200000	25	VFVEHIHVLENSLAFK	sp|P11590|MUP4_MOUSE;mus_MUP4			77
1	1	18	2092.92	0.021397	66.977	9439200	2	VHTVRDEECSELSMVADK	sp|B5X0G2|MUP17_MOUSE;mus_MUP17;tr|A2CEK6|A2CEK6_MOUSE;mus_MUP13;tr|L7N222|L7N222_MOUSE;tr|A2AKN8|A2AKN8_MOUSE;mus_MUP8;tr|E9PVW0|E9PVW0_MOUSE			79;74
0	1	9	1013.61	0.013377	101.65	12091000	2	VLENSLVLK	tr|B8JI96|B8JI96_MOUSE;tr|A2AKN8|A2AKN8_MOUSE;mus_MUP8;tr|E9PVW0|E9PVW0_MOUSE;tr|A2CEK7|A2CEK7_MOUSE;mus_MUP14			73;79;665
0	1	10	1178.63	0.0015281	119.34	38807000	3	WFSILLASDK	tr|B5TE77|B5TE77_MOUSE;sp|P11591|MUP5_MOUSE;mus_MUP5			78
1	1	11	1334.73	0.0086599	117.09	72062000	3	WFSILLASDKR	tr|B5TE77|B5TE77_MOUSE;sp|P11591|MUP5_MOUSE;mus_MUP5			78
					MUP4 NCBI
0	1	18	2054.97	1.4038e-13	129.36	355150000	13	AGEYSVMYDGFNTFTILK	sp|P11590|MUP4_MOUSE;mus_MUP4		MUP4	77
0	1	18	2067.96	5.0398e-26	195.38	181070000	63	FHTVIDGECSEIFLVADK	sp|P11590|MUP4_MOUSE;mus_MUP4		MUP4	77
0	2	21	2426.15	0.0038437	62.556	2979200	1	FHTVIDGECSEIFLVADKTEK	sp|P11590|MUP4_MOUSE;mus_MUP4		MUP4	77
0	1	14	1591.82	0.00049228	127.03	58809000	10	INGEWFSILLASDK	sp|P11590|MUP4_MOUSE;mus_MUP4		MUP4	77
1	1	15	1747.93	0.00079851	87.083	89879000	2	INGEWFSILLASDKR	sp|P11590|MUP4_MOUSE;mus_MUP4		MUP4	77
0	2	9	1002.53	0.000222	139.15	198760000	4	KADLNSDIK	sp|P11590|MUP4_MOUSE;mus_MUP4		MUP4	77
0	3	11	1259.67	3.9159e-26	132.14	6903200	1	KADLNSDIKEK	sp|P11590|MUP4_MOUSE;mus_MUP4		MUP4	77
0	1	9	1086.52	2.9147e-06	162.97	284380000	11	LCEEHGIIK	sp|P11590|MUP4_MOUSE;mus_MUP4		MUP4	77
0	1	15	1914.88	1.8852e-12	157.09	2522700000	23	TDYDNYIMFHLINEK	sp|P11590|MUP4_MOUSE;mus_MUP4		MUP4	77
0	1	16	1881.01	3.5235e-54	181.97	2173200000	25	VFVEHIHVLENSLAFK	sp|P11590|MUP4_MOUSE;mus_MUP4		MUP4	77
					MUP5
0	1	10	1178.63	0.0015281	119.34	38807000	3	WFSILLASDK	tr|B5TE77|B5TE77_MOUSE;sp|P11591|MUP5_MOUSE;mus_MUP5		MUP5/mup4	78
1	1	11	1334.73	0.0086599	117.09	72062000	3	WFSILLASDKR	tr|B5TE77|B5TE77_MOUSE;sp|P11591|MUP5_MOUSE;mus_MUP5		MUP5/mup4	78
0	1	16	1858.98	1.7945e-13	177.04	316610000	19	VFVEHIDVLENSLAFK	tr|B5TE77|B5TE77_MOUSE;sp|P11591|MUP5_MOUSE;mus_MUP5		MUP5	78
0	1	14	1785.84	0.00066912	115.34	103200000	10	TDYDNYIMFHLINK	tr|B5TE77|B5TE77_MOUSE;sp|P11591|MUP5_MOUSE;mus_MUP5		MUP5	78
0	2	15	1913.93	0.0079129	65.043	9623800	3	TDYDNYIMFHLINKK	tr|B5TE77|B5TE77_MOUSE;sp|P11591|MUP5_MOUSE;mus_MUP5		MUP5	78
1	1	14	1754.83	4.3184e-08	151.3	75190000	9	KDEENFQLMELFGR	tr|B5TE77|B5TE77_MOUSE;sp|P11591|MUP5_MOUSE;mus_MUP5		MUP5	78
1	2	23	2739.31	1.2038e-17	112.85	8735600	1	KDEENFQLMELFGREPDLSSDIK	tr|B5TE77|B5TE77_MOUSE;sp|P11591|MUP5_MOUSE;mus_MUP5		MUP5	78
0	1	18	2024.97	0.0075917	74.793	47241000	2	AGEYSVTYDGFNTFTILK	tr|B5TE77|B5TE77_MOUSE;sp|P11591|MUP5_MOUSE;mus_MUP5		MUP5	78
1	0	13	1626.73	0.0015674	119.39	34976000	5	DEENFQLMELFGR	tr|B5TE77|B5TE77_MOUSE;sp|P11591|MUP5_MOUSE;mus_MUP5		MUP5	78
1	1	22	2611.21	3.944e-16	101.92	4662800	3	DEENFQLMELFGREPDLSSDIK	tr|B5TE77|B5TE77_MOUSE;sp|P11591|MUP5_MOUSE;mus_MUP5		MUP5	78
1	1	10	1228.59	0.029858	72.607	10667000	1	EKIEEHGTMR	tr|B5TE77|B5TE77_MOUSE;sp|P11591|MUP5_MOUSE;mus_MUP5		MUP5	78
0	1	18	2170	9.4401e-09	117.53	53123000	10	FHTVIDEECTEIYLVADK	tr|B5TE77|B5TE77_MOUSE;sp|P11591|MUP5_MOUSE;mus_MUP5		MUP5	78
0	1	18	2008.94	3.2857e-16	133.52	995960000	12	AGEYSVTYDGFNTFTIPK	sp|B5X0G2|MUP17_MOUSE;mus_MUP17;tr|A2BIN0|A2BIN0_MOUSE;sp|P04938|MUP8_MOUSE;tr|A2AKN9|A2AKN9_MOUSE;sp|P02762|MUP6_MOUSE;mus_MUP9;mus_MUP2;mus_MUP19;mus_MUP16;tr|A2BIM8|A2BIM8_MOUSE;mus_MUP18;mus_MUP11;tr|A9R9W0|A9R9W0_MOUSE;tr|A2CEL1|A2CEL1_MOUSE;sp|P11588|MUP1_MOUSE;mus_MUP15;mus_MUP12;mus_MUP1;tr|A9C497|A9C497_MOUSE;tr|A9C496|A9C496_MOUSE;tr|A2CEL0|A2CEL0_MOUSE;tr|L7MUC7|L7MUC7_MOUSE;sp|P11589|…		MUP 1,2, 7-12,14-19	72;209;71;73;79;74;665
0	1	13	1500.58	7.2472e-05	145.6	819420000	67	DEECSELSMVADK	sp|B5X0G2|MUP17_MOUSE;mus_MUP17;tr|A2CEK6|A2CEK6_MOUSE;mus_MUP13;tr|L7N222|L7N222_MOUSE;sp|P04938|MUP8_MOUSE;tr|A2AKN9|A2AKN9_MOUSE;sp|P02762|MUP6_MOUSE;mus_MUP9;mus_MUP2;mus_MUP19;mus_MUP16;tr|A2BIM8|A2BIM8_MOUSE;mus_MUP18;mus_MUP11;tr|A9R9W0|A9R9W0_MOUSE;tr|A2CEL1|A2CEL1_MOUSE;sp|P11588|MUP1_MOUSE;mus_MUP15;mus_MUP12;mus_MUP1;tr|A9C497|A9C497_MOUSE;tr|A9C496|A9C496_MOUSE;tr|A2CEL0|A2CEL0_MOUSE;…		MUP 1,2,7-19	72;209;71;73;79;74
0	2	16	1858.76	8.5517e-05	101.42	32682000	8	DEECSELSMVADKTEK	sp|B5X0G2|MUP17_MOUSE;mus_MUP17;tr|A2CEK6|A2CEK6_MOUSE;mus_MUP13;tr|L7N222|L7N222_MOUSE;sp|P04938|MUP8_MOUSE;tr|A2AKN9|A2AKN9_MOUSE;sp|P02762|MUP6_MOUSE;mus_MUP9;mus_MUP2;mus_MUP19;mus_MUP16;tr|A2BIM8|A2BIM8_MOUSE;mus_MUP18;mus_MUP11;tr|A9R9W0|A9R9W0_MOUSE;tr|A2CEL1|A2CEL1_MOUSE;sp|P11588|MUP1_MOUSE;mus_MUP15;mus_MUP12;mus_MUP1;tr|A9C497|A9C497_MOUSE;tr|A9C496|A9C496_MOUSE;tr|A2CEL0|A2CEL0_MOUSE;…		MUP 1,2,7-19	72;209;71;73;79;74
1	0	13	1485.69	8.4235e-06	176.87	3774500000	66	DGETFQLMGLYGR	sp|B5X0G2|MUP17_MOUSE;mus_MUP17;tr|A2CEK6|A2CEK6_MOUSE;mus_MUP13;tr|L7N222|L7N222_MOUSE;tr|A2BIN0|A2BIN0_MOUSE;sp|P04938|MUP8_MOUSE;tr|A2AKN9|A2AKN9_MOUSE;sp|P02762|MUP6_MOUSE;mus_MUP9;mus_MUP2;mus_MUP19;mus_MUP16;tr|A2BIM8|A2BIM8_MOUSE;mus_MUP18;mus_MUP11;tr|A9R9W0|A9R9W0_MOUSE;tr|A2CEL1|A2CEL1_MOUSE;sp|P11588|MUP1_MOUSE;mus_MUP15;mus_MUP12;mus_MUP1;tr|A9C497|A9C497_MOUSE;tr|A9C496|A9C496_MOUSE;…		MUP 1,2,7-19	72;209;71;73;79;74;665
1	1	22	2470.17	3.0698e-17	111.01	29660000	15	DGETFQLMGLYGREPDLSSDIK	sp|B5X0G2|MUP17_MOUSE;mus_MUP17;tr|A2CEK6|A2CEK6_MOUSE;mus_MUP13;tr|L7N222|L7N222_MOUSE;tr|A2BIN0|A2BIN0_MOUSE;sp|P04938|MUP8_MOUSE;tr|A2AKN9|A2AKN9_MOUSE;sp|P02762|MUP6_MOUSE;mus_MUP9;mus_MUP2;mus_MUP19;mus_MUP16;tr|A2BIM8|A2BIM8_MOUSE;mus_MUP18;mus_MUP11;tr|A9R9W0|A9R9W0_MOUSE;tr|A2CEL1|A2CEL1_MOUSE;sp|P11588|MUP1_MOUSE;mus_MUP15;mus_MUP12;mus_MUP1;tr|A9C497|A9C497_MOUSE;tr|A9C496|A9C496_MOUSE;…		MUP 1,2,7-19	72;209;71;73;79;74;665
1	1	10	1257.61	0.0016701	132.32	1325700000	17	EKIEEHGNFR	sp|B5X0G2|MUP17_MOUSE;mus_MUP17;tr|A2CEK6|A2CEK6_MOUSE;mus_MUP13;tr|L7N222|L7N222_MOUSE		MUP 13,17	74
1	1	11	1287.63	0.012244	103.31	14469000	3	EPDLSSDIKER	sp|B5X0G2|MUP17_MOUSE;mus_MUP17;tr|A2CEK6|A2CEK6_MOUSE;mus_MUP13;tr|L7N222|L7N222_MOUSE;tr|A2BIN0|A2BIN0_MOUSE;sp|P04938|MUP8_MOUSE;tr|A2AKN9|A2AKN9_MOUSE;sp|P02762|MUP6_MOUSE;mus_MUP9;mus_MUP2;mus_MUP19;mus_MUP16;tr|A2BIM8|A2BIM8_MOUSE;mus_MUP18;mus_MUP11;tr|A9R9W0|A9R9W0_MOUSE;tr|A2CEL1|A2CEL1_MOUSE;sp|P11588|MUP1_MOUSE;mus_MUP15;mus_MUP12;mus_MUP1;tr|A9C497|A9C497_MOUSE;tr|A9C496|A9C496_MOUSE;…		MUP1,2,7-19	72;209;71;73;79;74;665
1	0	12	1460.69	1.2658e-25	236.11	3034500000	51	FAQLCEEHGILR	sp|B5X0G2|MUP17_MOUSE;mus_MUP17;tr|A2CEK6|A2CEK6_MOUSE;mus_MUP13;tr|L7N222|L7N222_MOUSE;tr|A2BIN0|A2BIN0_MOUSE;sp|P04938|MUP8_MOUSE;tr|A2AKN9|A2AKN9_MOUSE;sp|P02762|MUP6_MOUSE;mus_MUP9;mus_MUP2;mus_MUP19;mus_MUP16;tr|A2BIM8|A2BIM8_MOUSE;mus_MUP18;mus_MUP11;tr|A9C497|A9C497_MOUSE;tr|A9C496|A9C496_MOUSE;mus_MUP10;tr|A2BIN1|A2BIN1_MOUSE;tr|B8JI96|B8JI96_MOUSE;tr|A2AKN8|A2AKN8_MOUSE;mus_MUP8;tr|E9PVW…		MUP2,8-11,13,14,16-19	72;71;73;79;74;665
0	1	14	1595.83	1.5402e-07	169.98	317650000	13	INGEWHTIILASDK	sp|B5X0G2|MUP17_MOUSE;mus_MUP17;tr|A2CEK6|A2CEK6_MOUSE;mus_MUP13;tr|L7N222|L7N222_MOUSE;sp|P04938|MUP8_MOUSE;tr|A2AKN9|A2AKN9_MOUSE;sp|P02762|MUP6_MOUSE;mus_MUP9;mus_MUP2;mus_MUP19;mus_MUP16;tr|A2BIM8|A2BIM8_MOUSE;mus_MUP18;mus_MUP11;tr|A9R9W0|A9R9W0_MOUSE;tr|A2CEL1|A2CEL1_MOUSE;sp|P11588|MUP1_MOUSE;mus_MUP15;mus_MUP12;mus_MUP1;tr|A9C497|A9C497_MOUSE;tr|A9C496|A9C496_MOUSE;tr|A2CEL0|A2CEL0_MOUSE;…		MUP1,2, 7-19	72;209;71;73;79;74;665
1	1	15	1751.93	3.432e-12	193.45	344910000	22	INGEWHTIILASDKR	sp|B5X0G2|MUP17_MOUSE;mus_MUP17;tr|A2CEK6|A2CEK6_MOUSE;mus_MUP13;tr|L7N222|L7N222_MOUSE;sp|P04938|MUP8_MOUSE;tr|A2AKN9|A2AKN9_MOUSE;sp|P02762|MUP6_MOUSE;mus_MUP9;mus_MUP2;mus_MUP19;mus_MUP16;tr|A2BIM8|A2BIM8_MOUSE;mus_MUP18;mus_MUP11;tr|A9R9W0|A9R9W0_MOUSE;tr|A2CEL1|A2CEL1_MOUSE;sp|P11588|MUP1_MOUSE;mus_MUP15;mus_MUP12;mus_MUP1;tr|A9C497|A9C497_MOUSE;tr|A9C496|A9C496_MOUSE;tr|A2CEL0|A2CEL0_MOUSE;…		MUP1,2, 7-19	72;209;71;73;79;74;665
0	1	16	1894.09	2.544e-99	261.17	970760000	42	LFLEQIHVLENSLVLK	sp|B5X0G2|MUP17_MOUSE;mus_MUP17;tr|A2CEK6|A2CEK6_MOUSE;mus_MUP13;tr|L7N222|L7N222_MOUSE;sp|P04938|MUP8_MOUSE;tr|A2AKN9|A2AKN9_MOUSE;sp|P02762|MUP6_MOUSE;mus_MUP9;mus_MUP2;mus_MUP19;mus_MUP16;tr|A2BIM8|A2BIM8_MOUSE;mus_MUP18;mus_MUP11;tr|A9R9W0|A9R9W0_MOUSE;tr|A2CEL1|A2CEL1_MOUSE;sp|P11588|MUP1_MOUSE;mus_MUP15;mus_MUP12;mus_MUP1;tr|A9C497|A9C497_MOUSE;tr|A9C496|A9C496_MOUSE;tr|A2CEL0|A2CEL0_MOUSE;…		MUP 1,2,7,9,11-13, 15-19	72;74
0	1	15	1822.86	4.795e-05	119.96	4621300000	38	TDYDNFLMAHLINEK	sp|B5X0G2|MUP17_MOUSE;mus_MUP17;tr|A2CEK6|A2CEK6_MOUSE;mus_MUP13;tr|L7N222|L7N222_MOUSE;tr|A2BIN0|A2BIN0_MOUSE;sp|P04938|MUP8_MOUSE;tr|A2AKN9|A2AKN9_MOUSE;sp|P02762|MUP6_MOUSE;mus_MUP9;mus_MUP2;mus_MUP19;mus_MUP16;tr|A2BIM8|A2BIM8_MOUSE;mus_MUP18;mus_MUP11;tr|A9R9W0|A9R9W0_MOUSE;tr|A2CEL1|A2CEL1_MOUSE;sp|P11588|MUP1_MOUSE;mus_MUP15;mus_MUP12;mus_MUP1;tr|A9C497|A9C497_MOUSE;tr|A9C496|A9C496_MOUSE;…		MUP 1,2,7-19	72;209;71;73;79;74;665
1	1	28	3290.54	3.0705e-07	68.309	63729000	11	TDYDNFLMAHLINEKDGETFQLMGLYGR	sp|B5X0G2|MUP17_MOUSE;mus_MUP17;tr|A2CEK6|A2CEK6_MOUSE;mus_MUP13;tr|L7N222|L7N222_MOUSE;tr|A2BIN0|A2BIN0_MOUSE;sp|P04938|MUP8_MOUSE;tr|A2AKN9|A2AKN9_MOUSE;sp|P02762|MUP6_MOUSE;mus_MUP9;mus_MUP2;mus_MUP19;mus_MUP16;tr|A2BIM8|A2BIM8_MOUSE;mus_MUP18;mus_MUP11;tr|A9R9W0|A9R9W0_MOUSE;tr|A2CEL1|A2CEL1_MOUSE;sp|P11588|MUP1_MOUSE;mus_MUP15;mus_MUP12;mus_MUP1;tr|A9C497|A9C497_MOUSE;tr|A9C496|A9C496_MOUSE;…		MUP 1,2,7-19	72;209;71;73;79;74;665
1	1	18	2092.92	0.021397	66.977	9439200	2	VHTVRDEECSELSMVADK	sp|B5X0G2|MUP17_MOUSE;mus_MUP17;tr|A2CEK6|A2CEK6_MOUSE;mus_MUP13;tr|L7N222|L7N222_MOUSE;tr|A2AKN8|A2AKN8_MOUSE;mus_MUP8;tr|E9PVW0|E9PVW0_MOUSE		MUP 17,13, 7,8	79;74
0	1	11	1367.78	0.0048537	89.171	50080000	5	LFLEQIHVLEK	sp|P11589|MUP2_MOUSE;mus_MUP10;tr|A2BIN1|A2BIN1_MOUSE		MUP10	209;71
					MUP20
1	0	11	1271.65	0.0070565	139.86	25652000	12	ENIIDLTNANR	sp|Q5FW60|MUP20_MOUSE;mus_MUP20/Darcin		Mup20	75
1	0	12	1384.71	0.0030848	88.155	25897000	11	FAQLSEEHGIVR	sp|Q5FW60|MUP20_MOUSE;mus_MUP20/Darcin		MUP20	75
1	0	13	1557.71	0.0088017	70.438	6642600	1	DGETFQLMELYGR	sp|Q5FW60|MUP20_MOUSE;mus_MUP20/Darcin		MUP20/MUP21	75
1	0	9	1114.53	0.00035441	109.48	5913200	7	LCEEHGILR	sp|P11589|MUP2_MOUSE		MUP 2,8-11,13,14,16-19	209
1	1	10	1220.58	0.0079711	132.88	149540000	5	EKIEDNGNFR	sp|P04938|MUP8_MOUSE;tr|A2AKN9|A2AKN9_MOUSE;sp|P02762|MUP6_MOUSE;mus_MUP9;mus_MUP2;mus_MUP19;mus_MUP16;tr|A2BIM8|A2BIM8_MOUSE;mus_MUP18;mus_MUP11;tr|A9R9W0|A9R9W0_MOUSE;tr|A2CEL1|A2CEL1_MOUSE;sp|P11588|MUP1_MOUSE;mus_MUP15;mus_MUP12;mus_MUP1;tr|A9C497|A9C497_MOUSE;tr|A9C496|A9C496_MOUSE;tr|A2CEL0|A2CEL0_MOUSE;tr|L7MUC7|L7MUC7_MOUSE;sp|P11589|MUP2_MOUSE;mus_MUP10;tr|A2BIN1|A2BIN1_MOUSE;tr|B8JI96|B…		MUP 1,2,8-12, 14-16, 18,19	72;209;71;73;79;665
1	1	18	2140.92	1.5809e-24	160.09	1669300000	55	FHTVRDEECSELSMVADK	sp|P04938|MUP8_MOUSE;tr|A2AKN9|A2AKN9_MOUSE;sp|P02762|MUP6_MOUSE;mus_MUP9;mus_MUP2;mus_MUP19;mus_MUP16;tr|A2BIM8|A2BIM8_MOUSE;mus_MUP18;mus_MUP11;tr|A9R9W0|A9R9W0_MOUSE;tr|A2CEL1|A2CEL1_MOUSE;sp|P11588|MUP1_MOUSE;mus_MUP15;mus_MUP12;mus_MUP1;tr|A9C497|A9C497_MOUSE;tr|A9C496|A9C496_MOUSE;tr|A2CEL0|A2CEL0_MOUSE;sp|P11589|MUP2_MOUSE;mus_MUP10;tr|A2BIN1|A2BIN1_MOUSE;tr|A2CEK7|A2CEK7_MOUSE;mus_MUP14		MUP 1,2,9-12, 14-16, 18,19	72;209;71;73
1	2	21	2499.11	1.1028e-28	144.27	126200000	16	FHTVRDEECSELSMVADKTEK	sp|P04938|MUP8_MOUSE;tr|A2AKN9|A2AKN9_MOUSE;sp|P02762|MUP6_MOUSE;mus_MUP9;mus_MUP2;mus_MUP19;mus_MUP16;tr|A2BIM8|A2BIM8_MOUSE;mus_MUP18;mus_MUP11;tr|A9R9W0|A9R9W0_MOUSE;tr|A2CEL1|A2CEL1_MOUSE;sp|P11588|MUP1_MOUSE;mus_MUP15;mus_MUP12;mus_MUP1;tr|A9C497|A9C497_MOUSE;tr|A9C496|A9C496_MOUSE;tr|A2CEL0|A2CEL0_MOUSE;sp|P11589|MUP2_MOUSE;mus_MUP10;tr|A2BIN1|A2BIN1_MOUSE;tr|A2CEK7|A2CEK7_MOUSE;mus_MUP14		MUP 1,2,9-12, 14-16, 18,19	72;209;71;73
1	0	8	963.441	8.295e-17	178.08	0	2	IEDNGNFR	sp|P04938|MUP8_MOUSE;tr|A2AKN9|A2AKN9_MOUSE;sp|P02762|MUP6_MOUSE;mus_MUP9;mus_MUP2;mus_MUP19;mus_MUP16;tr|A2BIM8|A2BIM8_MOUSE;mus_MUP18;mus_MUP11;tr|A9R9W0|A9R9W0_MOUSE;tr|A2CEL1|A2CEL1_MOUSE;sp|P11588|MUP1_MOUSE;mus_MUP15;mus_MUP12;mus_MUP1;tr|A9C497|A9C497_MOUSE;tr|A9C496|A9C496_MOUSE;tr|A2CEL0|A2CEL0_MOUSE;tr|L7MUC7|L7MUC7_MOUSE;sp|P11589|MUP2_MOUSE;mus_MUP10;tr|A2BIN1|A2BIN1_MOUSE;tr|B8JI96|B…		MUP 1,2,8-12, 14-16, 18,19	72;209;71;73;79;665
0	1	9	1013.61	0.013377	101.65	12091000	2	VLENSLVLK	tr|B8JI96|B8JI96_MOUSE;tr|A2AKN8|A2AKN8_MOUSE;mus_MUP8;tr|E9PVW0|E9PVW0_MOUSE;tr|A2CEK7|A2CEK7_MOUSE;mus_MUP14		Mup 1,7,8,9,11-19	73;79;665
1	0	10	1256.62	0.0015709	140.49	924850000	46	TFQLMELYGR	sp|P11590|MUP4_MOUSE;mus_MUP4;tr|Q3KQQ2|Q3KQQ2_MOUSE;sp|P04939|MUP3_MOUSE;mus_MUP3		MUP3/MUP4	77;76
0	1	14	1751.86	0.0092689	58.781	8790500	1	TDYDNYIMIHLINK	tr|Q3KQQ2|Q3KQQ2_MOUSE;sp|P04939|MUP3_MOUSE;mus_MUP3;sp|Q5FW60|MUP20_MOUSE;mus_MUP20/Darcin		MP3/MUP20	75;76
1	0	11	1299.68	0.0024116	121.02	38808000	14	ENIIDLTNVNR	tr|Q3KQQ2|Q3KQQ2_MOUSE;sp|P04939|MUP3_MOUSE;mus_MUP3		MUP3/MUP21	76
